# Supplementary material for: Computationally defined and in vitro validated putative genomic safe harbour loci for transgene expression in human cells
Source: eLife journal article supplement (doi:10.7554/elife.79592), 2024-01-02

# Targeted GSH on chr1

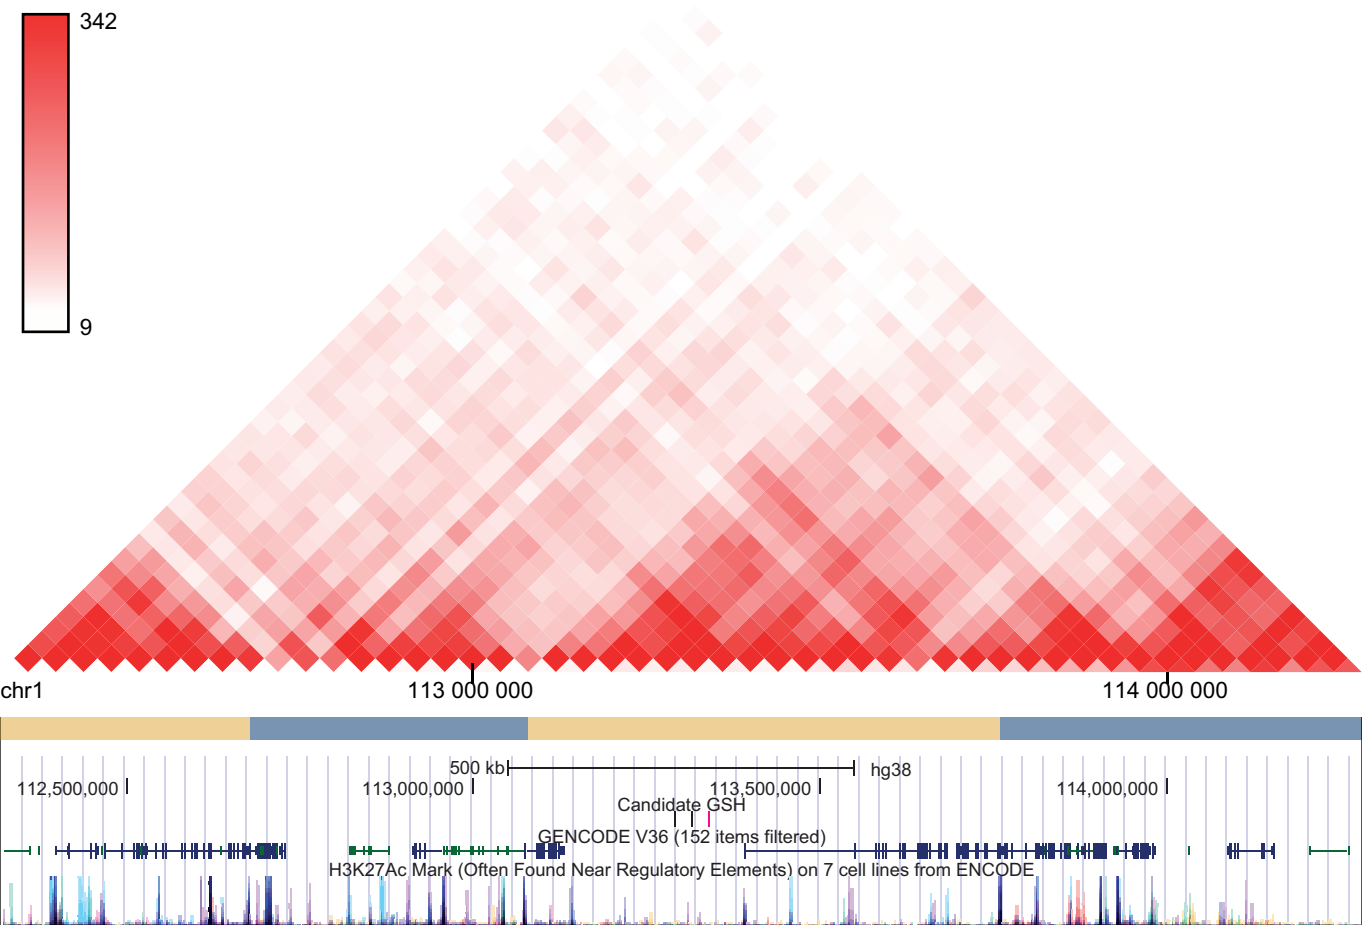

# Targeted GSH on chr2

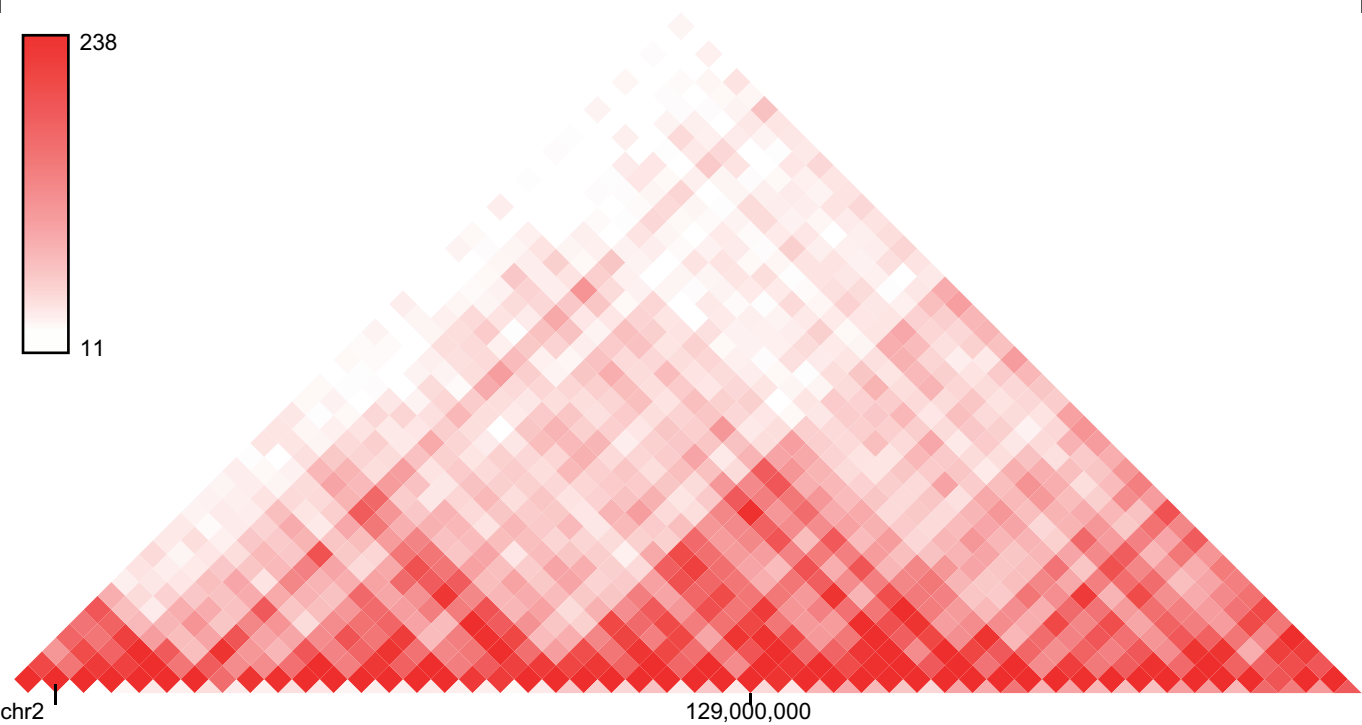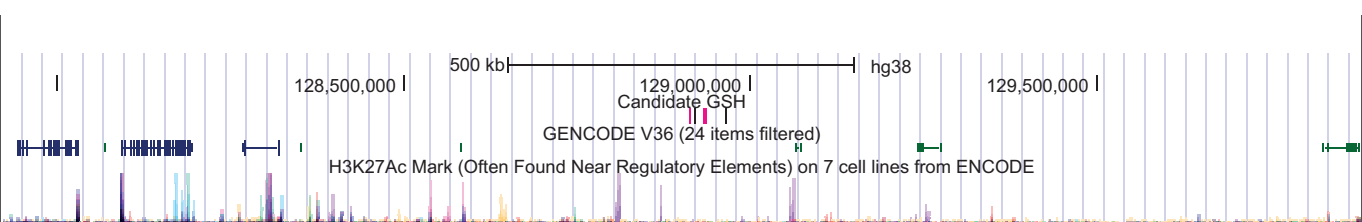

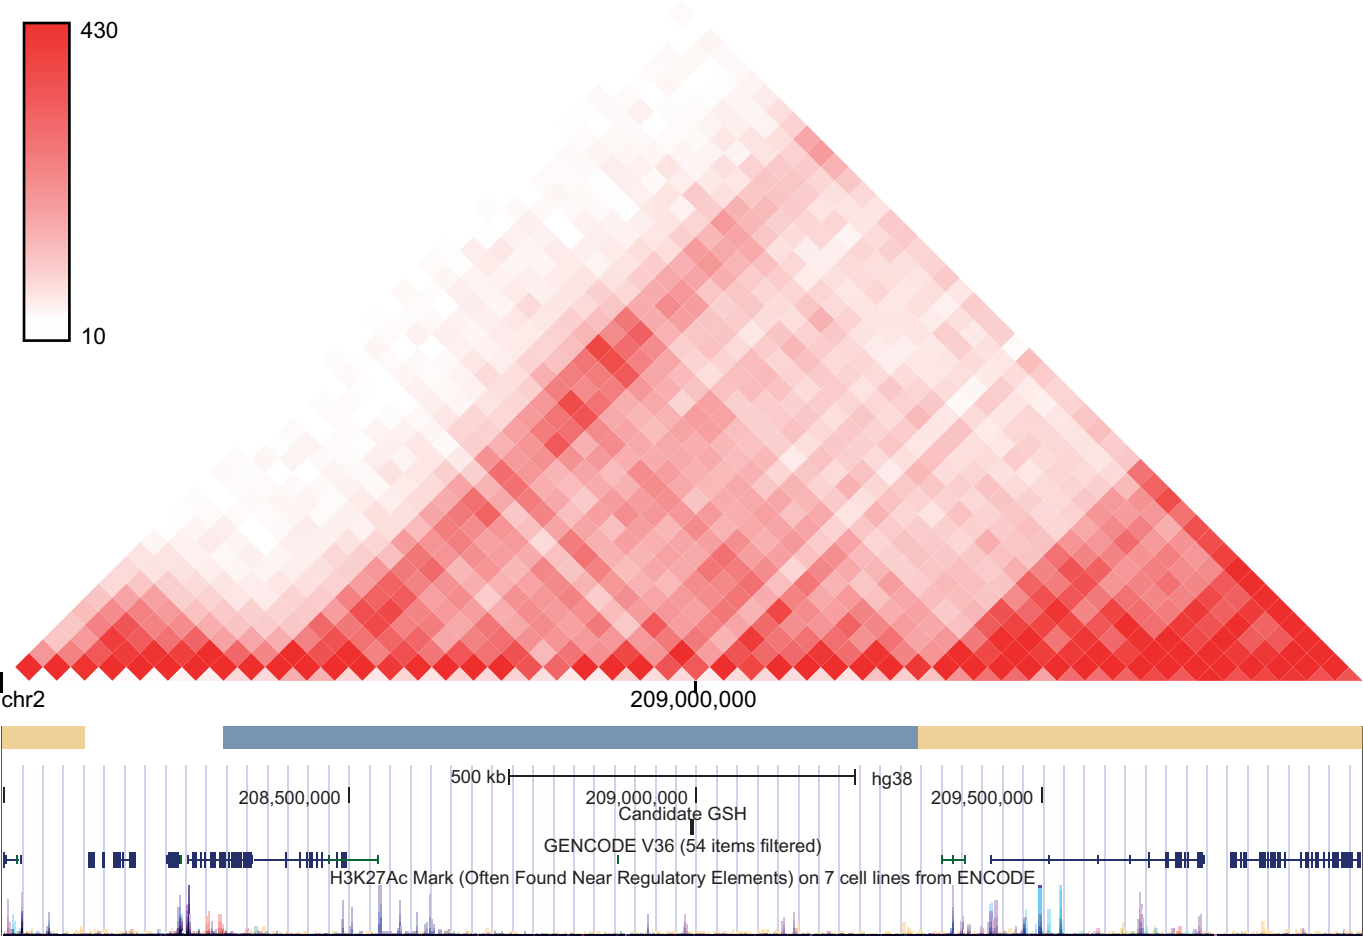

# Targeted GSH on chr4

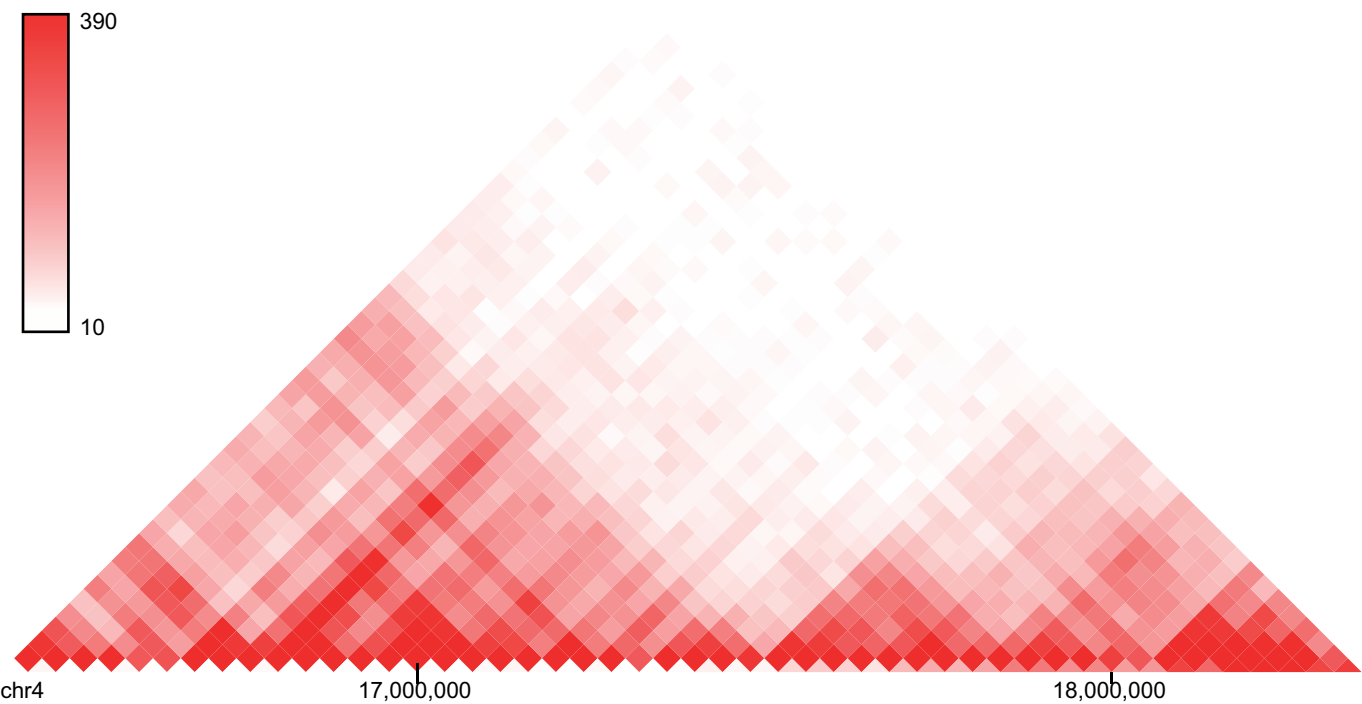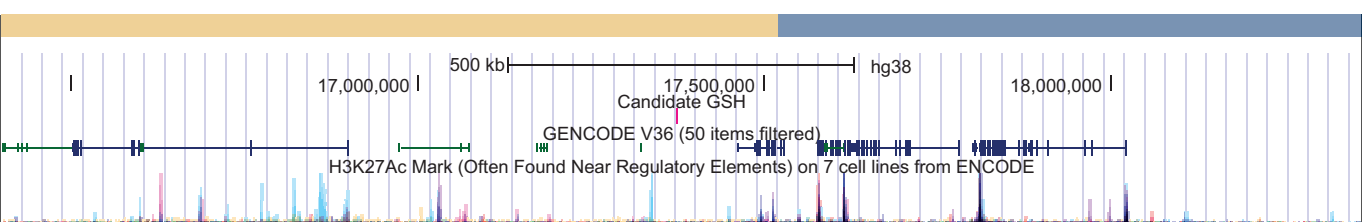

# Targeted GSH on chr6

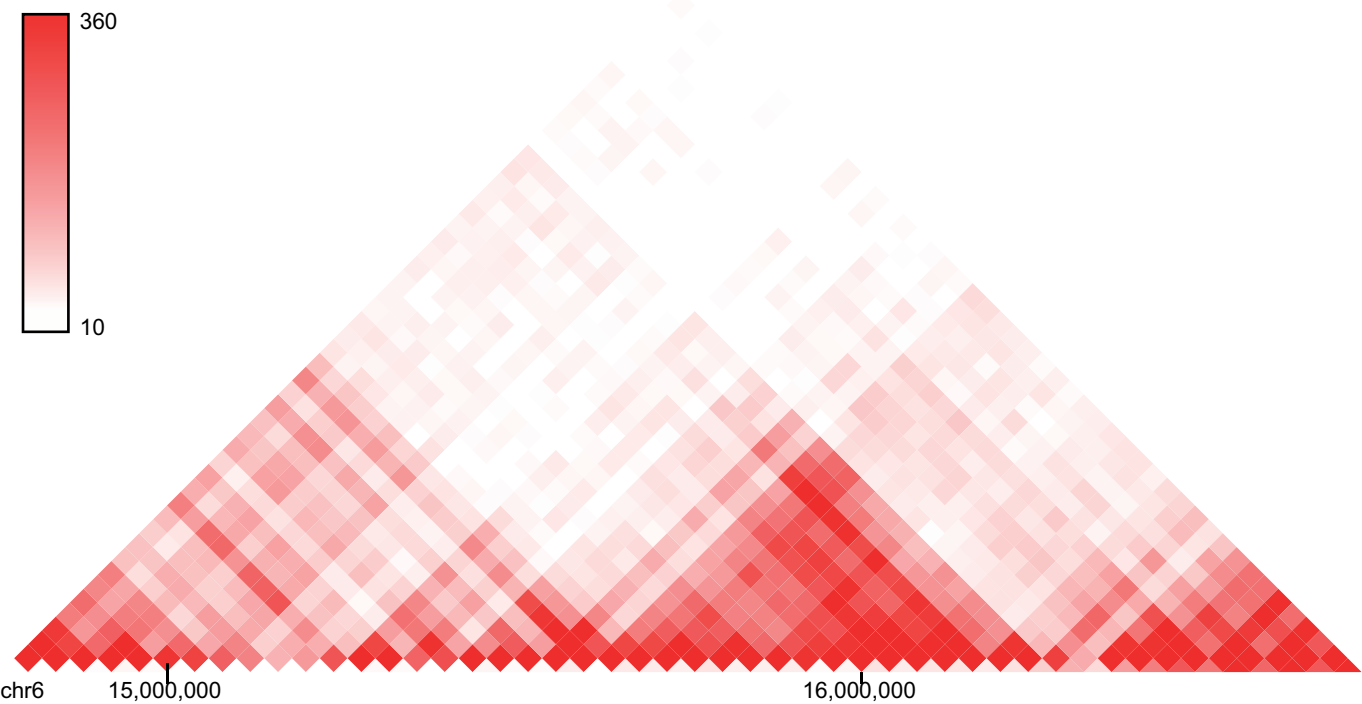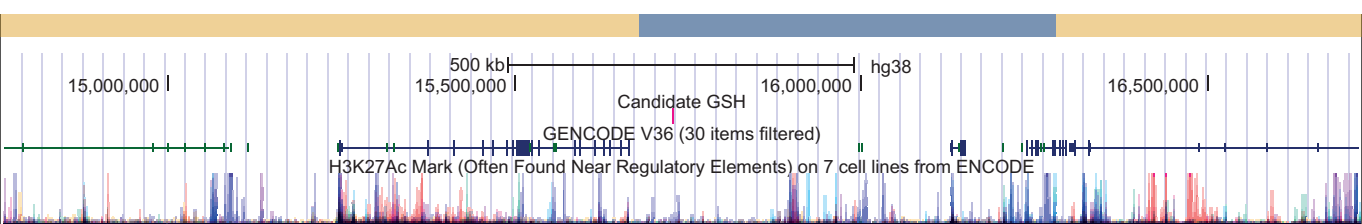

# Targeted GSH on chr18

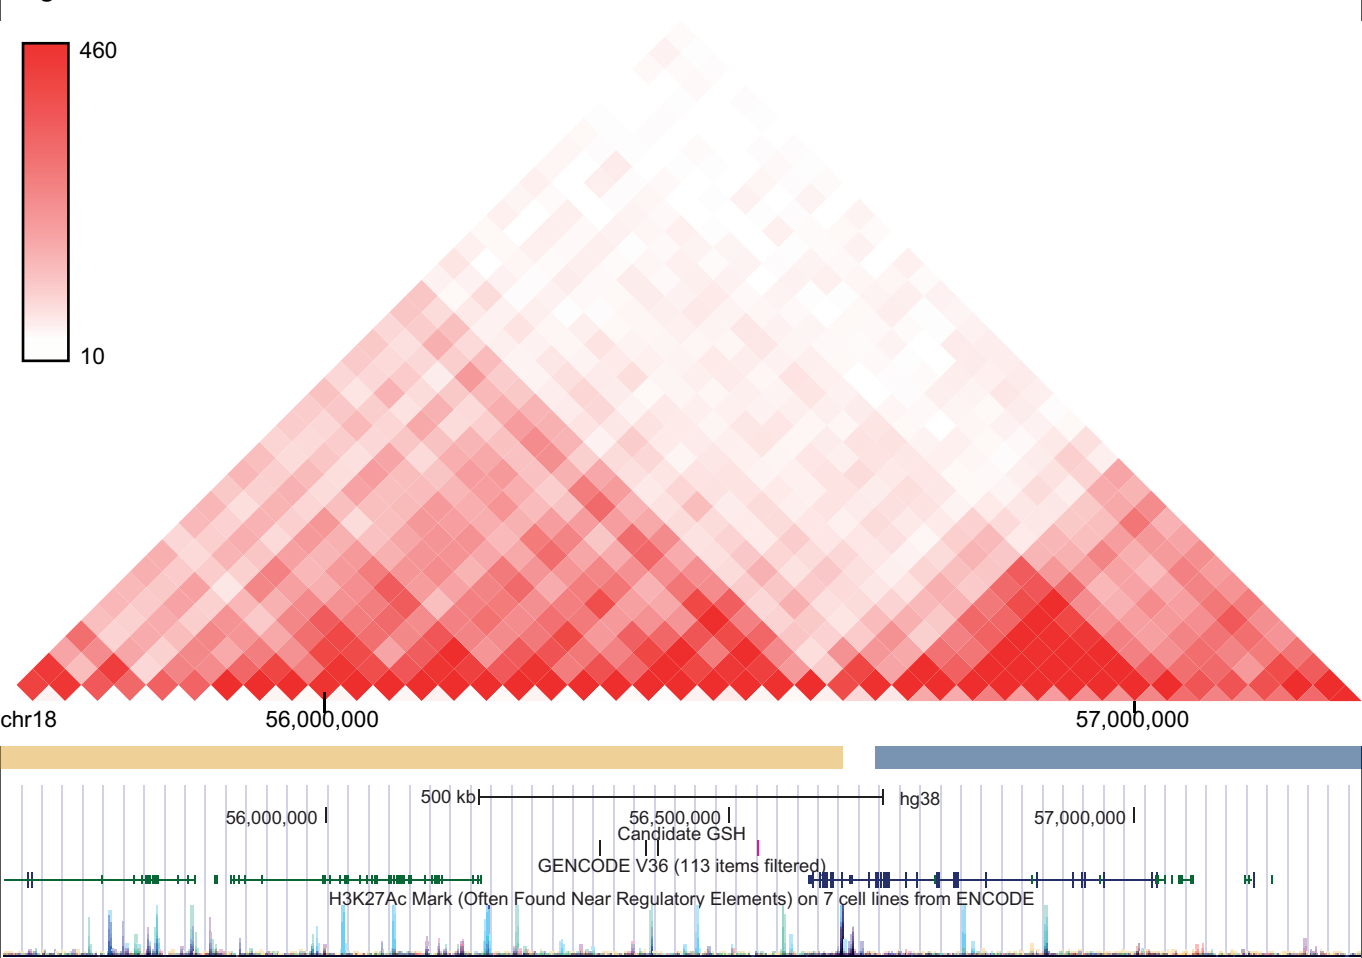

# Targeted GSH on chr19

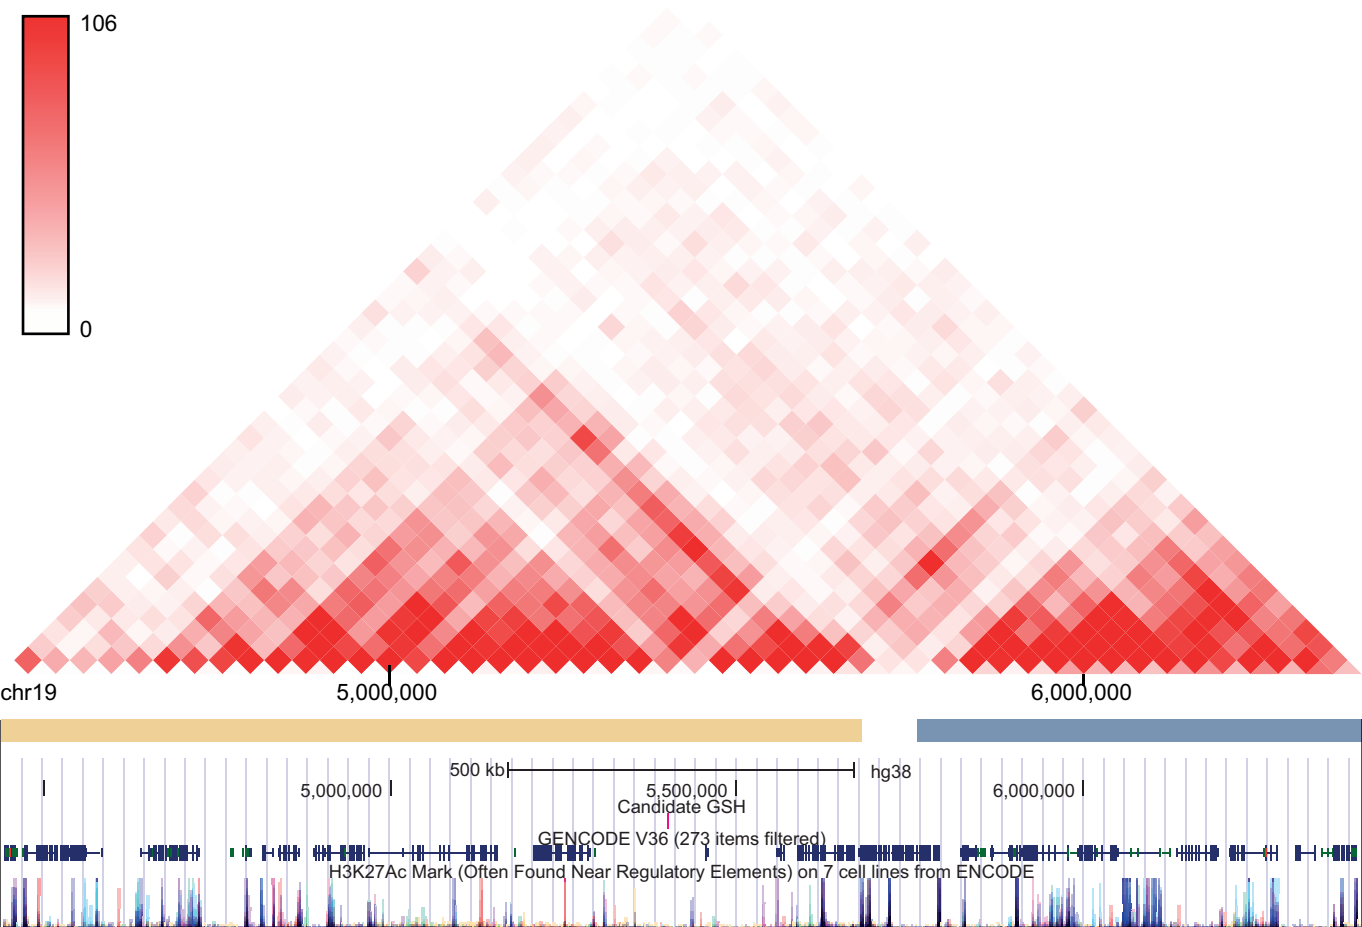

Supplement: supp [file elife-79592-supp-v1.zip]
