# Supplementary material for: Computationally defined and in vitro validated putative genomic safe harbour loci for transgene expression in human cells
Source: eLife. 2024 Jan 2;13:e79592. doi: 10.7554/eLife.79592 (PMC10836832; doi:10.7554/eLife.79592)
Supplement: Supplementary file 1. — (1) Coordinates that pass safe site filters. (2) Regions that pass active filters. (3) Overlap of safe sites and active regions. [file elife-79592-supp1.xlsx]

## Sheet: safe sites
Supplementary File 1-1: Coordinates that pass safe site filters
seqnames	start	end	width	strand
1	106380621	106380622	2	*
1	221043237	221043239	3	*
1	188612972	188612979	8	*
1	238707313	238707323	11	*
1	238989617	238989630	14	*
1	123693328	123693345	18	*
1	91168661	91168681	21	*
1	238727927	238727951	25	*
1	124701719	124701746	28	*
1	106342490	106342518	29	*
1	195641791	195641819	29	*
1	124225423	124225454	32	*
1	105787718	105787759	42	*
1	221194875	221194920	46	*
1	82170041	82170087	47	*
1	122540566	122540612	47	*
1	164212585	164212639	55	*
1	187905541	187905599	59	*
1	217414121	217414179	59	*
1	83312461	83312521	61	*
1	164075757	164075825	69	*
1	163832028	163832099	72	*
1	4260499	4260571	73	*
1	123525022	123525097	76	*
1	123518059	123518135	77	*
1	122849991	122850080	90	*
1	106451441	106451539	99	*
1	195654981	195655079	99	*
1	192012701	192012801	101	*
1	221019081	221019182	102	*
1	203576081	203576184	104	*
1	79601553	79601657	105	*
1	192017274	192017379	106	*
1	195371201	195371310	110	*
1	124662669	124662779	111	*
1	79758514	79758632	119	*
1	102541261	102541379	119	*
1	191361277	191361399	123	*
1	98591141	98591264	124	*
1	123006500	123006623	124	*
1	123879652	123879779	128	*
1	105835418	105835549	132	*
1	78804861	78804994	134	*
1	124229568	124229704	137	*
1	106353221	106353359	139	*
1	123360233	123360373	141	*
1	103287661	103287803	143	*
1	80887781	80887925	145	*
1	87606506	87606658	153	*
1	105183166	105183321	156	*
1	198059535	198059692	158	*
1	199625019	199625179	161	*
1	106468073	106468239	167	*
1	106482981	106483159	179	*
1	195399866	195400050	185	*
1	60362061	60362246	186	*
1	104640853	104641041	189	*
1	192026261	192026455	195	*
1	195920561	195920756	196	*
1	104553621	104553817	197	*
1	194572943	194573139	197	*
1	123688995	123689194	200	*
1	118540821	118541023	203	*
1	122639025	122639230	206	*
1	195587830	195588035	206	*
1	124269121	124269331	211	*
1	73047221	73047434	214	*
1	60370041	60370256	216	*
1	102745621	102745839	219	*
1	105504581	105504799	219	*
1	79765161	79765384	224	*
1	105334846	105335071	226	*
1	82054849	82055080	232	*
1	102158613	102158847	235	*
1	102548621	102548859	239	*
1	218235053	218235292	240	*
1	195883901	195884142	242	*
1	123269076	123269318	243	*
1	79835868	79836117	250	*
1	123923041	123923294	254	*
1	217286121	217286375	255	*
1	123513681	123513951	271	*
1	123562737	123563011	275	*
1	123637690	123637968	279	*
1	79794841	79795134	294	*
1	195905961	195906254	294	*
1	192083901	192084195	295	*
1	122868612	122868907	296	*
1	123699056	123699353	298	*
1	79908041	79908339	299	*
1	123807030	123807331	302	*
1	189593176	189593479	304	*
1	113289036	113289342	307	*
1	189234447	189234754	308	*
1	217280521	217280839	319	*
1	238683761	238684079	319	*
1	104561841	104562163	323	*
1	122760896	122761219	324	*
1	60466121	60466450	330	*
1	121761621	121761953	333	*
1	189209381	189209719	339	*
1	102674681	102675021	341	*
1	83233558	83233899	342	*
1	123252390	123252736	347	*
1	60480701	60481049	349	*
1	195192903	195193259	357	*
1	79753961	79754319	359	*
1	118378721	118379079	359	*
1	188608540	188608899	360	*
1	79931629	79931999	371	*
1	103982861	103983243	383	*
1	105208442	105208827	386	*
1	102583721	102584119	399	*
1	194580862	194581262	401	*
1	123436172	123436573	402	*
1	217247601	217248003	403	*
1	189611849	189612259	411	*
1	83320692	83321106	415	*
1	83293321	83293739	419	*
1	118793361	118793779	419	*
1	124033266	124033684	419	*
1	163630601	163631019	419	*
1	124158676	124159097	422	*
1	164193153	164193578	426	*
1	98412401	98412839	439	*
1	105230598	105231042	445	*
1	122749354	122749817	464	*
1	122939141	122939605	465	*
1	125083246	125083719	474	*
1	199469337	199469810	474	*
1	104306370	104306847	478	*
1	124870912	124871401	490	*
1	199564870	199565359	490	*
1	80228018	80228508	491	*
1	123772462	123772959	498	*
1	218757421	218757919	499	*
1	221051179	221051679	501	*
1	218230410	218230916	507	*
1	123273405	123273922	518	*
1	98877118	98877639	522	*
1	123333314	123333841	528	*
1	238666441	238666979	539	*
1	113339961	113340514	554	*
1	191539323	191539881	559	*
1	103987401	103987960	560	*
1	79918495	79919059	565	*
1	189395331	189395899	569	*
1	191411247	191411819	573	*
1	74815401	74815979	579	*
1	80978961	80979539	579	*
1	123799858	123800440	583	*
1	104723321	104723919	599	*
1	217385441	217386039	599	*
1	214731441	214732045	605	*
1	124971241	124971859	619	*
1	199825521	199826139	619	*
1	195283361	195283985	625	*
1	104589132	104589759	628	*
1	143260824	143261455	632	*
1	105774181	105774813	633	*
1	102667775	102668410	636	*
1	105356728	105357364	637	*
1	189427011	189427656	646	*
1	122701005	122701654	650	*
1	123869201	123869850	650	*
1	96141415	96142067	653	*
1	83242314	83242971	658	*
1	79577721	79578379	659	*
1	195300481	195301139	659	*
1	73408421	73409082	662	*
1	195363134	195363798	665	*
1	195100241	195100919	679	*
1	102574880	102575564	685	*
1	189342934	189343619	686	*
1	123262830	123263524	695	*
1	122616760	122617459	700	*
1	106294441	106295159	719	*
1	164242381	164243099	719	*
1	190061401	190062119	719	*
1	122842628	122843359	732	*
1	238631967	238632699	733	*
1	213342881	213343619	739	*
1	242599298	242600039	742	*
1	189418364	189419110	747	*
1	104547112	104547859	748	*
1	104350891	104351639	749	*
1	195387066	195387819	754	*
1	105380741	105381499	759	*
1	189362981	189363739	759	*
1	98569210	98569979	770	*
1	74843069	74843839	771	*
1	123927396	123928167	772	*
1	80954861	80955639	779	*
1	189272201	189272982	782	*
1	195534377	195535159	783	*
1	124470704	124471501	798	*
1	187856741	187857539	799	*
1	191524581	191525379	799	*
1	195552782	195553585	804	*
1	60312501	60313319	819	*
1	189390321	189391139	819	*
1	122926280	122927099	820	*
1	124074934	124075758	825	*
1	208870824	208871659	836	*
1	102683501	102684339	839	*
1	213358801	213359639	839	*
1	122779645	122780484	840	*
1	79444981	79445832	852	*
1	79697422	79698284	863	*
1	102533344	102534208	865	*
1	187834281	187835150	870	*
1	118770261	118771139	879	*
1	106321141	106322039	899	*
1	221062261	221063159	899	*
1	123933355	123934257	903	*
1	91084981	91085889	909	*
1	38647377	38648299	923	*
1	123901241	123902173	933	*
1	238031781	238032714	934	*
1	195314061	195315004	944	*
1	238977291	238978242	952	*
1	123538221	123539179	959	*
1	124413908	124414877	970	*
1	104432337	104433308	972	*
1	105224602	105225579	978	*
1	124016941	124017921	981	*
1	79729189	79730171	983	*
1	125077230	125078219	990	*
1	118371021	118372011	991	*
1	195559260	195560252	993	*
1	104674581	104675576	996	*
1	195269793	195270819	1027	*
1	106262108	106263137	1030	*
1	124680175	124681207	1033	*
1	122518281	122519319	1039	*
1	104668741	104669780	1040	*
1	218722175	218723219	1045	*
1	118363121	118364170	1050	*
1	102599361	102600415	1055	*
1	199595767	199596828	1062	*
1	189483486	189484555	1070	*
1	103183955	103185026	1072	*
1	124454268	124455340	1073	*
1	106390041	106391119	1079	*
1	199456321	199457405	1085	*
1	122345473	122346559	1087	*
1	190874619	190875719	1101	*
1	198050411	198051518	1108	*
1	103173481	103174599	1119	*
1	191447981	191449099	1119	*
1	124713658	124714779	1122	*
1	106631421	106632560	1140	*
1	118445039	118446179	1141	*
1	98857261	98858414	1154	*
1	214805826	214806979	1154	*
1	124571208	124572363	1156	*
1	122890663	122891825	1163	*
1	124902336	124903499	1164	*
1	123454742	123455913	1172	*
1	123792085	123793258	1174	*
1	123400975	123402150	1176	*
1	104624182	104625359	1178	*
1	118418858	118420039	1182	*
1	122933316	122934511	1196	*
1	123292864	123294059	1196	*
1	118450761	118451959	1199	*
1	79890091	79891299	1209	*
1	122340103	122341320	1218	*
1	106247141	106248369	1229	*
1	98584661	98585899	1239	*
1	104541761	104543019	1259	*
1	188399821	188401079	1259	*
1	123466325	123467599	1275	*
1	79582581	79583859	1279	*
1	190854941	190856219	1279	*
1	122607624	122608909	1286	*
1	195417867	195419160	1294	*
1	103837707	103839003	1297	*
1	104583321	104584619	1299	*
1	105153621	105154919	1299	*
1	105262301	105263605	1305	*
1	99379841	99381147	1307	*
1	198044460	198045766	1307	*
1	195215215	195216525	1311	*
1	96530601	96531919	1319	*
1	123576743	123578070	1328	*
1	189188116	189189444	1329	*
1	195220933	195222265	1333	*
1	106992746	106994079	1334	*
1	122467821	122469156	1336	*
1	121882506	121883842	1337	*
1	73428821	73430159	1339	*
1	125159454	125160799	1346	*
1	82132561	82133908	1348	*
1	101488841	101490199	1359	*
1	189242621	189243982	1362	*
1	123056201	123057577	1377	*
1	101514860	101516239	1380	*
1	194540748	194542127	1380	*
1	81025681	81027064	1384	*
1	122958101	122959490	1390	*
1	123078990	123080379	1390	*
1	121769051	121770444	1394	*
1	189580465	189581859	1395	*
1	79879381	79880779	1399	*
1	123366321	123367719	1399	*
1	189297531	189298930	1400	*
1	106427241	106428641	1401	*
1	102618221	102619627	1407	*
1	163599320	163600735	1416	*
1	124057521	124058948	1428	*
1	122722481	122723910	1430	*
1	195468921	195470358	1438	*
1	4287878	4289316	1439	*
1	191442381	191443819	1439	*
1	73036941	73038384	1444	*
1	106300763	106302219	1457	*
1	124086701	124088159	1459	*
1	218652921	218654379	1459	*
1	122878684	122880157	1474	*
1	124547034	124548515	1482	*
1	195163229	195164714	1486	*
1	105487531	105489019	1489	*
1	189400317	189401806	1490	*
1	74837524	74839016	1493	*
1	199673101	199674600	1500	*
1	125071581	125073088	1508	*
1	124364400	124365919	1520	*
1	124097493	124099027	1535	*
1	125010321	125011859	1539	*
1	122904980	122906524	1545	*
1	123042536	123044088	1553	*
1	73457263	73458846	1584	*
1	123625582	123627176	1595	*
1	195350761	195352359	1599	*
1	73496141	73497759	1619	*
1	103239841	103241459	1619	*
1	105748541	105750159	1619	*
1	91210001	91211624	1624	*
1	80860275	80861899	1625	*
1	195258853	195260479	1627	*
1	195447261	195448899	1639	*
1	195168860	195170501	1642	*
1	195381241	195382899	1659	*
1	124286492	124288159	1668	*
1	105177201	105178885	1685	*
1	122995646	122997339	1694	*
1	122559275	122560978	1704	*
1	124685293	124686997	1705	*
1	96896921	96898648	1728	*
1	104340107	104341841	1735	*
1	104015321	104017059	1739	*
1	122716625	122718375	1751	*
1	195453146	195454899	1754	*
1	218188742	218190499	1758	*
1	104480794	104482559	1766	*
1	195109821	195111590	1770	*
1	105780559	105782344	1786	*
1	122884241	122886029	1789	*
1	189412401	189414204	1804	*
1	195146379	195148190	1812	*
1	106333982	106335795	1814	*
1	118521581	118523399	1819	*
1	103843549	103845379	1831	*
1	199635372	199637219	1848	*
1	198036801	198038659	1859	*
1	124475561	124477436	1876	*
1	123631721	123633604	1884	*
1	217216881	217218770	1890	*
1	118513289	118515179	1891	*
1	217232681	217234579	1899	*
1	122768669	122770579	1911	*
1	124025421	124027336	1916	*
1	238946281	238948217	1937	*
1	191436081	191438021	1941	*
1	104528616	104530559	1944	*
1	124705814	124707758	1945	*
1	223450301	223452251	1951	*
1	105826001	105827972	1972	*
1	118854384	118856359	1976	*
1	103803515	103805493	1979	*
1	80795561	80797561	2001	*
1	60438527	60440530	2004	*
1	122594571	122596585	2015	*
1	123190041	123192059	2019	*
1	106346979	106348999	2021	*
1	60492556	60494579	2024	*
1	123942081	123944106	2026	*
1	122625599	122627626	2028	*
1	124736031	124738059	2029	*
1	82147941	82149975	2035	*
1	83184925	83186959	2035	*
1	123223199	123225242	2044	*
1	164201614	164203659	2046	*
1	123679211	123681268	2058	*
1	163676561	163678618	2058	*
1	123997708	123999773	2066	*
1	191678527	191680594	2068	*
1	105809521	105811599	2079	*
1	79463941	79466039	2099	*
1	191374411	191376511	2101	*
1	106238703	106240807	2105	*
1	103976569	103978699	2131	*
1	112105740	112107870	2131	*
1	164168734	164170864	2131	*
1	91184241	91186394	2154	*
1	195647667	195649825	2159	*
1	82102578	82104739	2162	*
1	191473321	191475487	2167	*
1	104498101	104500269	2169	*
1	199555689	199557859	2171	*
1	96152521	96154699	2179	*
1	121774519	121776699	2181	*
1	82068701	82070892	2192	*
1	98578301	98580499	2199	*
1	105250181	105252379	2199	*
1	196221141	196223373	2233	*
1	105305422	105307659	2238	*
1	70597101	70599359	2259	*
1	104394861	104397119	2259	*
1	123459971	123462256	2286	*
1	106281045	106283336	2292	*
1	123644621	123646919	2299	*
1	217397101	217399399	2299	*
1	105346674	105348982	2309	*
1	102634421	102636739	2319	*
1	104752481	104754799	2319	*
1	189570201	189572519	2319	*
1	123445656	123447978	2323	*
1	121968143	121970478	2336	*
1	124633976	124636312	2337	*
1	83266040	83268379	2340	*
1	118779135	118781479	2345	*
1	124882909	124885274	2366	*
1	163717122	163719527	2406	*
1	83170306	83172712	2407	*
1	98518938	98521359	2422	*
1	123748679	123751102	2424	*
1	105289618	105292045	2428	*
1	102195409	102197839	2431	*
1	123377381	123379818	2438	*
1	163688015	163690459	2445	*
1	123138066	123140530	2465	*
1	118833469	118835938	2470	*
1	102142921	102145411	2491	*
1	215237091	215239596	2506	*
1	124103105	124105614	2510	*
1	164158861	164161399	2539	*
1	217305801	217308339	2539	*
1	122236821	122239370	2550	*
1	91144121	91146677	2557	*
1	163641451	163644007	2557	*
1	123710058	123712628	2571	*
1	79674879	79677455	2577	*
1	196188421	196191043	2623	*
1	60323581	60326236	2656	*
1	123827661	123830319	2659	*
1	195924881	195927539	2659	*
1	98540454	98543119	2666	*
1	124515261	124517943	2683	*
1	195611776	195614459	2684	*
1	104299501	104302196	2696	*
1	218628561	218631259	2699	*
1	124954581	124957286	2706	*
1	102492941	102495659	2719	*
1	123033977	123036699	2723	*
1	91155596	91158319	2724	*
1	124187201	124189926	2726	*
1	123286059	123288786	2728	*
1	102150121	102152859	2739	*
1	123838141	123840907	2767	*
1	123979860	123982634	2775	*
1	98441761	98444549	2789	*
1	122753996	122756800	2805	*
1	164218501	164221319	2819	*
1	189491303	189494122	2820	*
1	4840541	4843379	2839	*
1	188389941	188392816	2876	*
1	102176541	102179439	2899	*
1	191623149	191626048	2900	*
1	217358219	217361126	2908	*
1	124493239	124496148	2910	*
1	105320509	105323419	2911	*
1	232295661	232298588	2928	*
1	164068641	164071582	2942	*
1	104616321	104619279	2959	*
1	123099701	123102659	2959	*
1	102511108	102514079	2972	*
1	122587462	122590433	2972	*
1	195176358	195179334	2977	*
1	4245053	4248039	2987	*
1	73414701	73417694	2994	*
1	189287437	189290447	3011	*
1	195631781	195634800	3020	*
1	101469061	101472139	3079	*
1	105238410	105241499	3090	*
1	105189441	105192539	3099	*
1	123231056	123234160	3105	*
1	122984484	122987599	3116	*
1	190071061	190074184	3124	*
1	208440576	208443719	3144	*
1	104771061	104774219	3159	*
1	164144621	164147799	3179	*
1	238712966	238716159	3194	*
1	214795995	214799199	3205	*
1	122895921	122899131	3211	*
1	38629601	38632839	3239	*
1	79940247	79943499	3253	*
1	191655909	191659179	3271	*
1	105312401	105315677	3277	*
1	122569221	122572506	3286	*
1	242588571	242591865	3295	*
1	121873581	121876879	3299	*
1	124875498	124878821	3324	*
1	123026587	123029918	3332	*
1	191337801	191341139	3339	*
1	124484304	124487673	3370	*
1	122784591	122787979	3389	*
1	105159121	105162519	3399	*
1	124977290	124980707	3418	*
1	189599441	189602879	3439	*
1	122693401	122696883	3483	*
1	195620821	195624303	3483	*
1	123012647	123016146	3500	*
1	190867025	190870539	3515	*
1	113314841	113318369	3529	*
1	96121669	96125299	3631	*
1	163619261	163622911	3651	*
1	96856813	96860464	3652	*
1	242616793	242620459	3667	*
1	104914361	104918099	3739	*
1	123568221	123571959	3739	*
1	118405456	118409199	3744	*
1	163848141	163851899	3759	*
1	195226431	195230192	3762	*
1	123145703	123149471	3769	*
1	106931410	106935201	3792	*
1	102503081	102506884	3804	*
1	79867861	79871679	3819	*
1	104568641	104572488	3848	*
1	104693692	104697559	3868	*
1	123069065	123072939	3875	*
1	124063005	124066900	3896	*
1	104451680	104455579	3900	*
1	104519560	104523459	3900	*
1	194781601	194785516	3916	*
1	98830786	98834705	3920	*
1	123477391	123481319	3929	*
1	91108869	91112819	3951	*
1	123277985	123281939	3955	*
1	122972219	122976183	3965	*
1	221005201	221009186	3986	*
1	83222061	83226056	3996	*
1	122949961	122953957	3997	*
1	73505081	73509153	4073	*
1	102166061	102170159	4099	*
1	104372400	104376499	4100	*
1	124961457	124965559	4103	*
1	123956444	123960561	4118	*
1	80782481	80786619	4139	*
1	123118410	123122559	4150	*
1	60379000	60383159	4160	*
1	103864181	103868359	4179	*
1	124249697	124253888	4192	*
1	124894001	124898197	4197	*
1	199441850	199446047	4198	*
1	123406258	123410493	4236	*
1	73530961	73535215	4255	*
1	123323381	123327659	4279	*
1	105140950	105145239	4290	*
1	4236521	4240819	4299	*
1	195320121	195324433	4313	*
1	213627097	213631415	4319	*
1	122830918	122835239	4322	*
1	195116301	195120643	4343	*
1	123859856	123864216	4361	*
1	195523979	195528341	4363	*
1	104331561	104335943	4383	*
1	187804641	187809029	4389	*
1	103849681	103854087	4407	*
1	195040301	195044711	4411	*
1	124640401	124644884	4484	*
1	191566025	191570585	4561	*
1	98807301	98811887	4587	*
1	78860144	78864739	4596	*
1	123314661	123319280	4620	*
1	164080021	164084646	4626	*
1	124260281	124264963	4683	*
1	124178394	124183115	4722	*
1	74020060	74024789	4730	*
1	104006441	104011173	4733	*
1	208488139	208492885	4747	*
1	123967047	123971816	4770	*
1	189261901	189266732	4832	*
1	189278301	189283162	4862	*
1	194637741	194642613	4873	*
1	164117381	164122259	4879	*
1	124166737	124171624	4888	*
1	124213534	124218441	4908	*
1	194646803	194651739	4937	*
1	122735592	122740559	4968	*
1	124718912	124723991	5080	*
1	124794541	124799626	5086	*
1	104832848	104837934	5087	*
1	4860481	4865579	5099	*
1	195087481	195092579	5099	*
1	78847141	78852253	5113	*
1	106309901	106315085	5185	*
1	124342588	124347779	5192	*
1	105277075	105282284	5210	*
1	124785215	124790452	5238	*
1	102553061	102558339	5279	*
1	124432921	124438231	5311	*
1	123242301	123247617	5317	*
1	194552707	194558059	5353	*
1	188328584	188333946	5363	*
1	123300007	123305371	5365	*
1	98507486	98512879	5394	*
1	195129981	195135439	5459	*
1	104606680	104612154	5475	*
1	124623439	124628929	5491	*
1	122493261	122498792	5532	*
1	98528701	98534379	5679	*
1	124351855	124357545	5691	*
1	124648977	124654667	5691	*
1	124666867	124672559	5693	*
1	118463426	118469157	5732	*
1	96167281	96173019	5739	*
1	122523490	122529291	5802	*
1	123665361	123671206	5846	*
1	103819262	103825139	5878	*
1	238037061	238042959	5899	*
1	124148718	124154620	5903	*
1	83301231	83307163	5933	*
1	105815841	105821799	5959	*
1	124576503	124582508	6006	*
1	122914257	122920314	6058	*
1	124459419	124465482	6064	*
1	189452026	189458092	6067	*
1	112152521	112158599	6079	*
1	191392821	191398913	6093	*
1	123717341	123723470	6130	*
1	122435826	122441956	6131	*
1	124742120	124748312	6193	*
1	123987232	123993577	6346	*
1	104845061	104851417	6357	*
1	189441141	189447539	6399	*
1	163988001	163994471	6471	*
1	199649061	199655546	6486	*
1	123086641	123093244	6604	*
1	105213821	105220468	6648	*
1	189465481	189472246	6766	*
1	123127031	123133968	6938	*
1	217201114	217208079	6966	*
1	118545754	118552799	7046	*
1	124535782	124542857	7076	*
1	104417024	104424155	7132	*
1	124907661	124914799	7139	*
1	124384356	124391609	7254	*
1	124559837	124567143	7307	*
1	123547769	123555130	7362	*
1	124329701	124337163	7463	*
1	123106794	123114279	7486	*
1	123848241	123855751	7511	*
1	123339344	123346859	7516	*
1	123593214	123600782	7569	*
1	124442587	124450160	7574	*
1	124421065	124428842	7778	*
1	216487697	216495479	7783	*
1	124500281	124508199	7919	*
1	104896321	104904259	7939	*
1	124292208	124300246	8039	*
1	164001571	164009613	8043	*
1	118350114	118358179	8066	*
1	102698641	102706715	8075	*
1	104815241	104823405	8165	*
1	122045139	122053356	8218	*
1	123383904	123392159	8256	*
1	104280197	104288472	8276	*
1	106662181	106670459	8279	*
1	124523390	124531684	8295	*
1	124984839	124993179	8341	*
1	194660376	194668794	8419	*
1	124997321	125005812	8492	*
1	98595416	98604008	8593	*
1	189325401	189334179	8779	*
1	123171361	123180181	8821	*
1	214776041	214784862	8822	*
1	83196341	83205219	8879	*
1	124273473	124282421	8949	*
1	73480701	73489737	9037	*
1	123909020	123918128	9109	*
1	199533998	199543108	9111	*
1	124233761	124243030	9270	*
1	123777018	123786292	9275	*
1	124312161	124321461	9301	*
1	124593008	124602311	9304	*
1	104652949	104662427	9479	*
1	199600886	199610397	9512	*
1	78809221	78818959	9739	*
1	83277158	83286973	9816	*
1	122392901	122402722	9822	*
1	124370049	124380234	10186	*
1	124194021	124204231	10211	*
1	122673807	122684065	10259	*
1	122854192	122864523	10332	*
1	122816409	122826803	10395	*
1	123734091	123744598	10508	*
1	124399001	124409715	10715	*
1	123883854	123894879	11026	*
1	123607787	123618959	11173	*
1	124606386	124617604	11219	*
1	122109775	122121188	11414	*
1	124039221	124051028	11808	*
1	124124662	124136618	11957	*
1	143281221	143293179	11959	*
1	123811435	123823489	12055	*
1	124752371	124764537	12167	*
1	123419733	123432081	12349	*
1	124768616	124781113	12498	*
1	123153541	123167159	13619	*
1	122448901	122463584	14684	*
1	80935640	80950687	15048	*
1	123201490	123217227	15738	*
1	122473229	122489132	15904	*
1	122350841	122366949	16109	*
1	122273367	122290987	17621	*
1	122371071	122388763	17693	*
1	124804784	124824139	19356	*
1	122212927	122232703	19777	*
1	125125876	125145879	20004	*
1	122406823	122427839	21017	*
1	121846746	121869459	22714	*
1	121680526	121705159	24634	*
1	122243452	122269223	25772	*
1	125090121	125116226	26106	*
1	121935771	121964001	28231	*
1	124918922	124950439	31518	*
1	122128981	122165179	36199	*
1	124828341	124866839	38499	*
1	122169321	122208866	39546	*
1	122295081	122336019	40939	*
1	121888360	121930489	42130	*
1	121709341	121753539	44199	*
1	125017765	125062177	44413	*
1	122057461	122105719	48259	*
1	121780741	121842398	61658	*
1	121974561	122041068	66508	*
1	125186468	143182711	17996244	*
10	9447341	9447342	2	*
10	80832215	80832217	3	*
10	131422173	131422176	4	*
10	37473004	37473010	7	*
10	125366240	125366256	17	*
10	109597661	109597681	21	*
10	111718332	111718359	28	*
10	105613681	105613711	31	*
10	34035381	34035419	39	*
10	83228081	83228119	39	*
10	39046233	39046279	47	*
10	71110486	71110533	48	*
10	55825561	55825619	59	*
10	111750186	111750259	74	*
10	53672561	53672639	79	*
10	83377601	83377688	88	*
10	107629880	107629968	89	*
10	81311600	81311699	100	*
10	41192241	41192343	103	*
10	37455514	37455627	114	*
10	92776064	92776179	116	*
10	105424935	105425054	120	*
10	111609023	111609150	128	*
10	44087585	44087719	135	*
10	56100157	56100291	135	*
10	76745841	76745979	139	*
10	83197361	83197499	139	*
10	107550654	107550796	143	*
10	115960341	115960487	147	*
10	57782101	57782256	156	*
10	90284881	90285039	159	*
10	81512736	81512899	164	*
10	107288661	107288825	165	*
10	129150146	129150319	174	*
10	84656981	84657156	176	*
10	83392387	83392563	177	*
10	90311361	90311539	179	*
10	108401761	108401939	179	*
10	58460698	58460879	182	*
10	90350206	90350404	199	*
10	127623924	127624123	200	*
10	56472956	56473159	204	*
10	9460961	9461179	219	*
10	57711401	57711619	219	*
10	56064721	56064955	235	*
10	107236121	107236358	238	*
10	107405441	107405679	239	*
10	36708850	36709099	250	*
10	40986797	40987050	254	*
10	65426206	65426459	254	*
10	56144581	56144839	259	*
10	123247721	123247979	259	*
10	131483143	131483406	264	*
10	80868111	80868379	269	*
10	85065701	85065973	273	*
10	107399821	107400118	298	*
10	53515401	53515709	309	*
10	57735361	57735670	310	*
10	2828269	2828579	311	*
10	81561881	81562192	312	*
10	56203047	56203359	313	*
10	16150801	16151119	319	*
10	41801041	41801359	319	*
10	53186423	53186754	332	*
10	128503108	128503439	332	*
10	56121039	56121377	339	*
10	56510881	56511231	351	*
10	111627001	111627359	359	*
10	84792778	84793143	366	*
10	9632207	9632584	378	*
10	56162381	56162759	379	*
10	106330014	106330419	406	*
10	53567901	53568307	407	*
10	56730628	56731039	412	*
10	108350481	108350919	439	*
10	53510784	53511229	446	*
10	100595817	100596279	463	*
10	39849341	39849833	493	*
10	106490762	106491259	498	*
10	109407601	109408104	504	*
10	111669291	111669799	509	*
10	80875989	80876499	511	*
10	53145141	53145659	519	*
10	109040281	109040799	519	*
10	9567841	9568361	521	*
10	107359381	107359909	529	*
10	105630850	105631379	530	*
10	36805610	36806145	536	*
10	44080301	44080839	539	*
10	106477181	106477735	555	*
10	76692621	76693176	556	*
10	84814221	84814779	559	*
10	81441739	81442299	561	*
10	109414697	109415259	563	*
10	56787614	56788177	564	*
10	105416290	105416859	570	*
10	53548844	53549419	576	*
10	61228157	61228739	583	*
10	84747870	84748459	590	*
10	85331641	85332231	591	*
10	127644765	127645359	595	*
10	83201681	83202279	599	*
10	111574881	111575479	599	*
10	128426841	128427439	599	*
10	10634441	10635059	619	*
10	37461601	37462219	619	*
10	9132592	9133222	631	*
10	55848581	55849222	642	*
10	41440335	41440979	645	*
10	39976709	39977360	652	*
10	56479061	56479715	655	*
10	109057701	109058359	659	*
10	36746541	36747211	671	*
10	81272581	81273258	678	*
10	78824717	78825399	683	*
10	81416341	81417025	685	*
10	37445161	37445859	699	*
10	85308981	85309739	759	*
10	81454303	81455070	768	*
10	83467071	83467839	769	*
10	40894297	40895081	785	*
10	124275394	124276179	786	*
10	81243561	81244355	795	*
10	116019660	116020459	800	*
10	81635561	81636377	817	*
10	9078520	9079342	823	*
10	84856701	84857530	830	*
10	107678510	107679353	844	*
10	9498197	9499054	858	*
10	81556781	81557639	859	*
10	56892576	56893439	864	*
10	109311261	109312126	866	*
10	84882253	84883119	867	*
10	40584781	40585659	879	*
10	127476801	127477679	879	*
10	42077153	42078048	896	*
10	55999581	56000499	919	*
10	107353358	107354279	922	*
10	105294541	105295471	931	*
10	56859181	56860126	946	*
10	80847543	80848491	949	*
10	125351181	125352137	957	*
10	131613290	131614250	961	*
10	85040341	85041303	963	*
10	56802337	56803312	976	*
10	56735201	56736179	979	*
10	53526031	53527023	993	*
10	36695061	36696059	999	*
10	57861361	57862359	999	*
10	111664161	111665163	1003	*
10	36700251	36701263	1013	*
10	110384963	110385979	1017	*
10	81653181	81654211	1031	*
10	84912961	84913999	1039	*
10	37450141	37451185	1045	*
10	56966409	56967459	1051	*
10	38891576	38892635	1060	*
10	9465339	9466399	1061	*
10	81323904	81324979	1076	*
10	59467541	59468619	1079	*
10	105310917	105311999	1083	*
10	81285201	81286299	1099	*
10	120292161	120293259	1099	*
10	81254449	81255564	1116	*
10	84618061	84619180	1120	*
10	44139725	44140859	1135	*
10	9640161	9641299	1139	*
10	83501881	83503019	1139	*
10	120297459	120298602	1144	*
10	83238535	83239679	1145	*
10	39423528	39424679	1152	*
10	40367592	40368746	1155	*
10	81209641	81210819	1179	*
10	47005365	47006545	1181	*
10	2847161	2848359	1199	*
10	81671830	81673039	1210	*
10	41516281	41517499	1219	*
10	56219138	56220359	1222	*
10	53640541	53641778	1238	*
10	57901601	57902841	1241	*
10	36773892	36775179	1288	*
10	81229373	81230672	1300	*
10	57887521	57888839	1319	*
10	56993877	56995199	1323	*
10	81640539	81641879	1341	*
10	41077212	41078596	1385	*
10	56765503	56766895	1393	*
10	131368080	131369499	1420	*
10	39628299	39629744	1446	*
10	81699314	81700800	1487	*
10	106469861	106471359	1499	*
10	57680837	57682358	1522	*
10	40731238	40732760	1523	*
10	84918237	84919759	1523	*
10	81335823	81337357	1535	*
10	37046553	37048099	1547	*
10	108415679	108417226	1548	*
10	85326023	85327572	1550	*
10	56197353	56198906	1554	*
10	57765841	57767413	1573	*
10	109354833	109356408	1576	*
10	41030822	41032419	1598	*
10	18852781	18854379	1599	*
10	106431577	106433179	1603	*
10	111682801	111684419	1619	*
10	41521621	41523257	1637	*
10	81475801	81477437	1637	*
10	85070201	85071839	1639	*
10	128593348	128594999	1652	*
10	81085659	81087334	1676	*
10	39934841	39936517	1677	*
10	40953801	40955480	1680	*
10	56884343	56886062	1720	*
10	38915374	38917099	1726	*
10	41751761	41753499	1739	*
10	56952121	56953899	1779	*
10	53654252	53656039	1788	*
10	84758608	84760395	1788	*
10	39962981	39964791	1811	*
10	109395884	109397699	1816	*
10	131468959	131470778	1820	*
10	39981472	39983309	1838	*
10	22063401	22065239	1839	*
10	34070261	34072099	1839	*
10	36260141	36261979	1839	*
10	109078321	109080160	1840	*
10	81446814	81448659	1846	*
10	81469031	81470879	1849	*
10	106343667	106345519	1853	*
10	56484561	56486419	1859	*
10	83494321	83496179	1859	*
10	41224229	41226099	1871	*
10	131506401	131508273	1873	*
10	39073641	39075534	1894	*
10	109320278	109322182	1905	*
10	39546697	39548603	1907	*
10	41082693	41084600	1908	*
10	53704781	53706713	1933	*
10	55839621	55841559	1939	*
10	9478123	9480074	1952	*
10	129081981	129083939	1959	*
10	81591081	81593099	2019	*
10	18846435	18848457	2023	*
10	83472221	83474279	2059	*
10	83568121	83570179	2059	*
10	90253740	90255799	2060	*
10	41527331	41529397	2067	*
10	57749061	57751139	2079	*
10	57671712	57673821	2110	*
10	81222041	81224156	2116	*
10	76660996	76663119	2124	*
10	81506537	81508663	2127	*
10	81235201	81237330	2130	*
10	109435861	109438000	2140	*
10	90333244	90335419	2176	*
10	56923461	56925645	2185	*
10	57719182	57721386	2205	*
10	81550411	81552619	2209	*
10	84774241	84776459	2219	*
10	56870041	56872268	2228	*
10	39413368	39415599	2232	*
10	56227301	56229539	2239	*
10	55876987	55879258	2272	*
10	76750481	76752772	2292	*
10	107571345	107573639	2295	*
10	9432761	9435065	2305	*
10	56072777	56075099	2323	*
10	56658530	56660858	2329	*
10	127631653	127633999	2347	*
10	127602806	127605179	2374	*
10	84806156	84808539	2384	*
10	10652860	10655263	2404	*
10	111585801	111588259	2459	*
10	53179800	53182275	2476	*
10	81389462	81391939	2478	*
10	90236461	90238959	2499	*
10	62139273	62141823	2551	*
10	90297481	90300034	2554	*
10	56235426	56237991	2566	*
10	107316721	107319299	2579	*
10	41024071	41026679	2609	*
10	41337742	41340372	2631	*
10	91330621	91333259	2639	*
10	56462401	56465117	2717	*
10	56525990	56528719	2730	*
10	127792731	127795474	2744	*
10	84729704	84732497	2794	*
10	41476794	41479618	2825	*
10	125358561	125361389	2829	*
10	109117861	109120739	2879	*
10	100602489	100605369	2881	*
10	55902063	55904968	2906	*
10	56188575	56191491	2917	*
10	106458181	106461119	2939	*
10	116033421	116036359	2939	*
10	36813058	36815999	2942	*
10	58032441	58035382	2942	*
10	83130510	83133463	2954	*
10	22859423	22862401	2979	*
10	80991621	80994619	2999	*
10	39109426	39112443	3018	*
10	40824596	40827639	3044	*
10	81396129	81399183	3055	*
10	55991503	55994579	3077	*
10	109092991	109096082	3092	*
10	81431001	81434095	3095	*
10	85075981	85079078	3098	*
10	100586472	100589579	3108	*
10	56149181	56152289	3109	*
10	127669193	127672371	3179	*
10	56792896	56796079	3184	*
10	106418061	106421299	3239	*
10	37421161	37424419	3259	*
10	81052337	81055607	3271	*
10	83438295	83441579	3285	*
10	109750081	109753366	3286	*
10	107306821	107310119	3299	*
10	59472816	59476156	3341	*
10	83384881	83388225	3345	*
10	15924021	15927389	3369	*
10	39894843	39898239	3397	*
10	81351971	81355381	3411	*
10	106319541	106322986	3446	*
10	85090961	85094409	3449	*
10	39127840	39131292	3453	*
10	105452235	105455739	3505	*
10	109084317	109087894	3578	*
10	16136041	16139619	3579	*
10	39968895	39972559	3665	*
10	56773621	56777295	3675	*
10	41432541	41436216	3676	*
10	109333546	109337239	3694	*
10	40102067	40105761	3695	*
10	41464238	41467939	3702	*
10	55804221	55807963	3743	*
10	38976208	38979979	3772	*
10	56166961	56170759	3799	*
10	39384317	39388139	3823	*
10	83173561	83177459	3899	*
10	84642281	84646237	3957	*
10	61307349	61311446	4098	*
10	15947101	15951211	4111	*
10	39429114	39433246	4133	*
10	81290841	81294979	4139	*
10	107254641	107258779	4139	*
10	128667001	128671148	4148	*
10	108378283	108382439	4157	*
10	56107172	56111351	4180	*
10	41111041	41115259	4219	*
10	81341846	81346119	4274	*
10	81517201	81521481	4281	*
10	37670001	37674299	4299	*
10	41502746	41507051	4306	*
10	56044741	56049099	4359	*
10	109130601	109135000	4400	*
10	61201761	61206166	4406	*
10	108992736	108997195	4460	*
10	81075534	81079999	4466	*
10	81359476	81363979	4504	*
10	81526761	81531272	4512	*
10	41036525	41041050	4526	*
10	9584553	9589119	4567	*
10	39200321	39204899	4579	*
10	80836461	80841077	4617	*
10	56253541	56258179	4639	*
10	56979181	56983839	4659	*
10	39000261	39004959	4699	*
10	40492576	40497299	4724	*
10	37406321	37411060	4740	*
10	83145773	83150535	4763	*
10	91321630	91326421	4792	*
10	111638027	111642840	4814	*
10	55916344	55921159	4816	*
10	39448261	39453105	4845	*
10	105405249	105410179	4931	*
10	40921441	40926383	4943	*
10	39569472	39574479	5008	*
10	39801447	39806519	5073	*
10	41703141	41708238	5098	*
10	22072681	22077788	5108	*
10	56683162	56688279	5118	*
10	41067947	41073111	5165	*
10	105316321	105321495	5175	*
10	39375001	39380206	5206	*
10	105442767	105448034	5268	*
10	39953531	39958799	5269	*
10	44146621	44152008	5388	*
10	41058441	41063867	5427	*
10	41569593	41575065	5473	*
10	109366221	109371806	5586	*
10	76703581	76709319	5739	*
10	81736111	81741919	5809	*
10	81581000	81586839	5840	*
10	55883441	55889363	5923	*
10	15913698	15919643	5946	*
10	40976644	40982714	6071	*
10	56706303	56712389	6087	*
10	81199381	81205479	6099	*
10	36829421	36835539	6119	*
10	56826161	56832451	6291	*
10	85014639	85020978	6340	*
10	18992234	18998599	6366	*
10	84974361	84980759	6399	*
10	128647781	128654219	6439	*
10	131594401	131600961	6561	*
10	39437381	39443979	6599	*
10	53586721	53593360	6640	*
10	39531200	39537859	6660	*
10	39757111	39763779	6669	*
10	80880741	80887608	6868	*
10	9117941	9124819	6879	*
10	39552686	39559679	6994	*
10	36288006	36295000	6995	*
10	81486581	81493639	7059	*
10	109604701	109611813	7113	*
10	105475901	105483035	7135	*
10	41397941	41405098	7158	*
10	39116521	39123679	7159	*
10	83410855	83418019	7165	*
10	61235061	61242379	7319	*
10	9522421	9529810	7390	*
10	39188782	39196173	7392	*
10	9484274	9491762	7489	*
10	65457314	65464846	7533	*
10	41757593	41765324	7732	*
10	107326290	107334139	7850	*
10	81538341	81546239	7899	*
10	39498105	39506059	7955	*
10	39137650	39145659	8010	*
10	41805561	41813699	8139	*
10	16123540	16131875	8336	*
10	53195286	53203839	8554	*
10	81616515	81625092	8578	*
10	39788063	39796744	8682	*
10	105372952	105381642	8691	*
10	41045203	41054089	8887	*
10	39031373	39040299	8927	*
10	37656741	37665819	9079	*
10	81371621	81380847	9227	*
10	81711201	81720479	9279	*
10	56014427	56023719	9293	*
10	39212719	39222739	10021	*
10	81761723	81771819	10097	*
10	39902381	39912598	10218	*
10	39810673	39821001	10329	*
10	39327641	39337976	10336	*
10	39392321	39403159	10839	*
10	41153122	41164144	11023	*
10	41486519	41497582	11064	*
10	41736181	41747547	11367	*
10	38984191	38996179	11989	*
10	40959560	40972299	12740	*
10	39510201	39523099	12899	*
10	40431868	40445255	13388	*
10	38896701	38910219	13519	*
10	40758972	40772759	13788	*
10	39916843	39930709	13867	*
10	39261943	39275939	13997	*
10	40207921	40222479	14559	*
10	41173162	41188102	14941	*
10	41445077	41460126	15050	*
10	39307981	39323416	15436	*
10	40501447	40517013	15567	*
10	38871839	38887439	15601	*
10	39767919	39783919	16001	*
10	40901201	40917336	16136	*
10	39089131	39105272	16142	*
10	41714181	41730349	16169	*
10	40521175	40537809	16635	*
10	41344480	41361699	17220	*
10	38922274	38939759	17486	*
10	40109861	40127819	17959	*
10	40736870	40754878	18009	*
10	39009161	39027310	18150	*
10	41088728	41106972	18245	*
10	41410183	41428450	18268	*
10	41196423	41214859	18437	*
10	39050515	39069571	19057	*
10	40930484	40949671	19188	*
10	40831687	40851107	19421	*
10	39825101	39845305	20205	*
10	40075550	40096019	20470	*
10	41820585	41841179	20595	*
10	41311893	41333639	21747	*
10	39463641	39486504	22864	*
10	38948561	38972134	23574	*
10	40372818	40396639	23822	*
10	39279981	39303816	23836	*
10	40994596	41019995	25400	*
10	40400741	40427753	27013	*
10	41769430	41796879	27450	*
10	41365773	41393779	28007	*
10	39724421	39753041	28621	*
10	39342115	39370760	28646	*
10	41119434	41148988	29555	*
10	41533596	41564206	30611	*
10	41277052	41307834	30783	*
10	39226821	39257658	30838	*
10	40642939	40674679	31741	*
10	39989961	40022330	32370	*
10	40855221	40887845	32625	*
10	39583341	39616619	33279	*
10	40290741	40324344	33604	*
10	39150761	39184539	33779	*
10	40328466	40362872	34407	*
10	38833006	38867754	34749	*
10	40543874	40580640	36767	*
10	39853954	39890779	36826	*
10	40449375	40488295	38921	*
10	41230138	41272667	42530	*
10	40776870	40820492	43623	*
10	40027280	40071493	44214	*
10	40678701	40727139	48439	*
10	40589850	40638771	48922	*
10	47813594	47868738	55145	*
10	40226677	40286653	59977	*
10	40133501	40203864	70364	*
10	39635768	39720297	84530	*
10	41587390	41699090	111701	*
10	41917061	42065360	148300	*
11	91895309	91895319	11	*
11	55183910	55183921	12	*
11	42872817	42872839	23	*
11	97491733	97491757	25	*
11	38390254	38390295	42	*
11	50795308	50795359	52	*
11	98805741	98805799	59	*
11	25229861	25229922	62	*
11	103518613	103518681	69	*
11	91646703	91646779	77	*
11	91561181	91561259	79	*
11	25401073	25401153	81	*
11	39786254	39786339	86	*
11	109336166	109336259	94	*
11	42607925	42608019	95	*
11	38829882	38829979	98	*
11	36805800	36805899	100	*
11	37206057	37206159	103	*
11	54377121	54377229	109	*
11	37330561	37330672	112	*
11	38762681	38762798	118	*
11	39634961	39635079	119	*
11	109314965	109315099	135	*
11	37636441	37636579	139	*
11	42366014	42366159	146	*
11	100503554	100503699	146	*
11	127550429	127550579	151	*
11	54415021	54415172	152	*
11	53265053	53265207	155	*
11	25362464	25362623	160	*
11	22998349	22998509	161	*
11	97376719	97376879	161	*
11	21607040	21607201	162	*
11	98232421	98232594	174	*
11	37399521	37399696	176	*
11	25207084	25207264	181	*
11	42636634	42636839	206	*
11	40007628	40007842	215	*
11	127535229	127535444	216	*
11	54313637	54313859	223	*
11	50733391	50733619	229	*
11	107089961	107090194	234	*
11	42781956	42782190	235	*
11	48759541	48759779	239	*
11	25285295	25285543	249	*
11	38822421	38822674	254	*
11	39547761	39548016	256	*
11	127870395	127870659	265	*
11	24115261	24115528	268	*
11	39455141	39455419	279	*
11	91284361	91284678	318	*
11	21620369	21620699	331	*
11	115027044	115027379	336	*
11	79731761	79732099	339	*
11	20283226	20283571	346	*
11	116291101	116291453	353	*
11	79775121	79775479	359	*
11	91466181	91466552	372	*
11	15330723	15331104	382	*
11	98368191	98368579	389	*
11	91521167	91521562	396	*
11	24023341	24023739	399	*
11	81455468	81455867	400	*
11	91568180	91568579	400	*
11	37155873	37156280	408	*
11	42753081	42753495	415	*
11	127723637	127724059	423	*
11	79765826	79766259	434	*
11	42446761	42447199	439	*
11	97564631	97565079	449	*
11	80191738	80192201	464	*
11	52425221	52425685	465	*
11	37580701	37581179	479	*
11	21662271	21662759	489	*
11	20256101	20256608	508	*
11	80171101	80171610	510	*
11	98372781	98373305	525	*
11	38781781	38782309	529	*
11	21599921	21600479	559	*
11	26893781	26894351	571	*
11	127545038	127545610	573	*
11	37359034	37359608	575	*
11	87389001	87389579	579	*
11	50759364	50759952	589	*
11	54933242	54933835	594	*
11	37493721	37494315	595	*
11	37160460	37161059	600	*
11	26809341	26809943	603	*
11	39552135	39552745	611	*
11	15338302	15338919	618	*
11	91551261	91551879	619	*
11	53227568	53228194	627	*
11	39719141	39719779	639	*
11	54251229	54251879	651	*
11	39538621	39539278	658	*
11	25498861	25499523	663	*
11	55188028	55188711	684	*
11	24147701	24148399	699	*
11	127855221	127855919	699	*
11	36906461	36907169	709	*
11	97767181	97767889	709	*
11	37295561	37296279	719	*
11	80889021	80889739	719	*
11	54787736	54788459	724	*
11	42661748	42662479	732	*
11	37094754	37095499	746	*
11	42453232	42453995	764	*
11	127885719	127886492	774	*
11	127540012	127540788	777	*
11	42867801	42868579	779	*
11	57113917	57114704	788	*
11	39023841	39024630	790	*
11	37248840	37249634	795	*
11	20241301	20242099	799	*
11	50583338	50584139	802	*
11	37218241	37219049	809	*
11	53768807	53769617	811	*
11	127718302	127719112	811	*
11	25405441	25406259	819	*
11	25517761	25518579	819	*
11	91600463	91601281	819	*
11	25258561	25259385	825	*
11	98384001	98384830	830	*
11	37820461	37821294	834	*
11	79868741	79869579	839	*
11	36893161	36894004	844	*
11	114968141	114968992	852	*
11	40012401	40013259	859	*
11	24016659	24017518	860	*
11	37799241	37800119	879	*
11	21591061	21591943	883	*
11	57108698	57109582	885	*
11	116252441	116253339	899	*
11	42989777	42990683	907	*
11	38261391	38262298	908	*
11	54405909	54406816	908	*
11	50783174	50784092	919	*
11	97593361	97594279	919	*
11	98400781	98401704	924	*
11	25214181	25215123	943	*
11	25346701	25347646	946	*
11	50718461	50719417	957	*
11	97486441	97487403	963	*
11	37546747	37547719	973	*
11	38133825	38134801	977	*
11	79722901	79723879	979	*
11	37148141	37149123	983	*
11	100522321	100523319	999	*
11	49507541	49508545	1005	*
11	104768099	104769119	1021	*
11	39417592	39418621	1030	*
11	25412849	25413879	1031	*
11	127743192	127744255	1064	*
11	91627921	91628986	1066	*
11	39017361	39018439	1079	*
11	52828741	52829819	1079	*
11	53163198	53164279	1082	*
11	39429965	39431059	1095	*
11	24366339	24367439	1101	*
11	51144777	51145880	1104	*
11	38342257	38343379	1123	*
11	127466641	127467763	1123	*
11	98460361	98461495	1135	*
11	107080683	107081819	1137	*
11	39812721	39813879	1159	*
11	24061201	24062371	1171	*
11	42617746	42618916	1171	*
11	38975881	38977052	1172	*
11	25333141	25334319	1179	*
11	97419181	97420359	1179	*
11	98319161	98320359	1199	*
11	80179761	80180979	1219	*
11	98335401	98336639	1239	*
11	52698121	52699394	1274	*
11	21579621	21580919	1299	*
11	38141561	38142879	1319	*
11	37522101	37523439	1339	*
11	55169361	55170719	1359	*
11	89122041	89123399	1359	*
11	20265821	20267182	1362	*
11	25224151	25225519	1369	*
11	98284741	98286119	1379	*
11	36828161	36829551	1391	*
11	37437502	37438898	1397	*
11	79838142	79839556	1415	*
11	22953057	22954479	1423	*
11	97440081	97441504	1424	*
11	91329897	91331334	1438	*
11	39648521	39649959	1439	*
11	23003261	23004720	1460	*
11	37138361	37139825	1465	*
11	39402721	39404199	1479	*
11	98187761	98189259	1499	*
11	24011001	24012502	1502	*
11	36813941	36815447	1507	*
11	100527910	100529419	1510	*
11	38847528	38849039	1512	*
11	38293859	38295374	1516	*
11	114944461	114945984	1524	*
11	106653221	106654746	1526	*
11	97382145	97383719	1575	*
11	38984876	38986456	1581	*
11	53076719	53078308	1590	*
11	25373961	25375560	1600	*
11	23936137	23937742	1606	*
11	37267063	37268679	1617	*
11	50788441	50790059	1619	*
11	116319501	116321159	1659	*
11	42458198	42459861	1664	*
11	42479243	42480919	1677	*
11	100570301	100571979	1679	*
11	39511941	39513631	1691	*
11	97598441	97600139	1699	*
11	38886759	38888459	1701	*
11	53529583	53531300	1718	*
11	48736521	48738239	1719	*
11	79779661	79781379	1719	*
11	39377401	39379160	1760	*
11	106638624	106640418	1795	*
11	36961272	36963067	1796	*
11	26921381	26923179	1799	*
11	42359981	42361779	1799	*
11	39408370	39410179	1810	*
11	51099563	51101377	1815	*
11	80905501	80907316	1816	*
11	25267581	25269399	1819	*
11	98254420	98256246	1827	*
11	53846521	53848353	1833	*
11	24072761	24074619	1859	*
11	38999155	39001019	1865	*
11	38769626	38771511	1886	*
11	26116041	26117943	1903	*
11	24001108	24003019	1912	*
11	26814801	26816716	1916	*
11	24104761	24106679	1919	*
11	106647141	106649059	1919	*
11	49484440	49486360	1921	*
11	25191025	25192953	1929	*
11	52871942	52873892	1951	*
11	114807699	114809699	2001	*
11	52684282	52686309	2028	*
11	39749921	39751979	2059	*
11	50711561	50713639	2079	*
11	98273241	98275319	2079	*
11	54392219	54394299	2081	*
11	39503541	39505639	2099	*
11	91455861	91457959	2099	*
11	26872389	26874496	2108	*
11	37316381	37318519	2139	*
11	52703514	52705667	2154	*
11	38895621	38897779	2159	*
11	50814515	50816724	2210	*
11	37348374	37350596	2223	*
11	55205467	55207719	2253	*
11	39940321	39942619	2299	*
11	97711061	97713375	2315	*
11	38931143	38933459	2317	*
11	50799621	50801999	2379	*
11	54292486	54294871	2386	*
11	91317443	91319839	2397	*
11	50561001	50563399	2399	*
11	97725141	97727539	2399	*
11	127837301	127839699	2399	*
11	54774849	54777268	2420	*
11	48763893	48766319	2427	*
11	37373881	37376319	2439	*
11	110533761	110536202	2442	*
11	42517221	42519679	2459	*
11	25479521	25482016	2496	*
11	114728529	114731079	2551	*
11	37832821	37835399	2579	*
11	48807081	48809663	2583	*
11	97781616	97784199	2584	*
11	21670399	21673002	2604	*
11	25427701	25430331	2631	*
11	39469397	39472035	2639	*
11	79789261	79791899	2639	*
11	48745509	48748179	2671	*
11	79750921	79753599	2679	*
11	80132041	80134719	2679	*
11	97369892	97372578	2687	*
11	55162460	55165199	2740	*
11	42566481	42569259	2779	*
11	80112108	80114899	2792	*
11	52353681	52356477	2797	*
11	38798562	38801379	2818	*
11	97585941	97588759	2819	*
11	38905551	38908386	2836	*
11	50744501	50747339	2839	*
11	39557541	39560400	2860	*
11	55197601	55200492	2892	*
11	97392561	97395459	2899	*
11	100454191	100457099	2909	*
11	114765539	114768454	2916	*
11	91441169	91444089	2921	*
11	25366815	25369759	2945	*
11	50459044	50461999	2956	*
11	38377041	38380059	3019	*
11	24095726	24098778	3053	*
11	109689542	109692629	3088	*
11	48752362	48755473	3112	*
11	39656601	39659719	3119	*
11	37241068	37244210	3143	*
11	37563508	37566699	3192	*
11	23029701	23032919	3219	*
11	106587341	106590559	3219	*
11	48826881	48830110	3230	*
11	37536114	37539347	3234	*
11	42485101	42488359	3259	*
11	98839194	98842459	3266	*
11	98502181	98505459	3279	*
11	106662041	106665319	3279	*
11	42789601	42792919	3319	*
11	97402523	97405964	3442	*
11	15351620	15355129	3510	*
11	52690384	52694029	3646	*
11	39005301	39008961	3661	*
11	52323101	52326819	3719	*
11	48677548	48681280	3733	*
11	37030541	37034287	3747	*
11	98263248	98266999	3752	*
11	91616887	91620639	3753	*
11	97789221	97792979	3759	*
11	15386751	15390519	3769	*
11	98324641	98328430	3790	*
11	53065561	53069365	3805	*
11	49493401	49497219	3819	*
11	54381347	54385239	3893	*
11	26885266	26889204	3939	*
11	48772761	48776709	3949	*
11	25470250	25474239	3990	*
11	107094801	107098799	3999	*
11	55175599	55179670	4072	*
11	127777795	127781879	4085	*
11	80217554	80221650	4097	*
11	42379401	42383499	4099	*
11	48816281	48820379	4099	*
11	100475881	100479991	4111	*
11	52330899	52335024	4126	*
11	131081323	131085476	4154	*
11	36796161	36800319	4159	*
11	114903021	114907179	4159	*
11	48780910	48785079	4170	*
11	98810021	98814299	4279	*
11	106571121	106575439	4319	*
11	98436887	98441299	4413	*
11	37428861	37433327	4467	*
11	98784566	98789057	4492	*
11	114838466	114843027	4562	*
11	52626661	52631239	4579	*
11	52675458	52680239	4782	*
11	116150973	116155754	4782	*
11	53253397	53258179	4783	*
11	25379781	25384579	4799	*
11	54072483	54077413	4931	*
11	25274041	25278979	4939	*
11	53667579	53672574	4996	*
11	100425141	100430212	5072	*
11	39796701	39801779	5079	*
11	20296341	20301456	5116	*
11	50569061	50574319	5259	*
11	52897460	52902728	5269	*
11	91577761	91583039	5279	*
11	42856194	42861475	5282	*
11	79874537	79879920	5384	*
11	100412201	100417638	5438	*
11	52662015	52667563	5549	*
11	36917472	36923047	5576	*
11	98479945	98485599	5655	*
11	53836754	53842410	5657	*
11	39604090	39609965	5876	*
11	114747461	114753345	5885	*
11	97829521	97835448	5928	*
11	114997872	115003812	5941	*
11	54349598	54355559	5962	*
11	39350184	39356159	5976	*
11	38940632	38946719	6088	*
11	53956136	53962283	6148	*
11	91504882	91511062	6181	*
11	109716701	109723019	6319	*
11	100488745	100495259	6515	*
11	54846681	54853199	6519	*
11	54857368	54863919	6552	*
11	52360566	52367169	6604	*
11	38912480	38919085	6606	*
11	98340841	98347470	6630	*
11	54937961	54944651	6691	*
11	25301695	25308721	7027	*
11	54921996	54929030	7035	*
11	37016121	37023165	7045	*
11	50771941	50779108	7168	*
11	97474995	97482219	7225	*
11	38858161	38865438	7278	*
11	54835100	54842519	7420	*
11	25458561	25466155	7595	*
11	52860191	52867819	7629	*
11	51463420	51471066	7647	*
11	15396330	15403978	7649	*
11	54116281	54123944	7664	*
11	53966450	53974259	7810	*
11	54060582	54068402	7821	*
11	50678261	50686439	8179	*
11	42999401	43007622	8222	*
11	50639041	50647420	8380	*
11	39757650	39766094	8445	*
11	53485171	53493699	8529	*
11	53803552	53812119	8568	*
11	127510141	127518790	8650	*
11	54885520	54894503	8984	*
11	52932101	52941459	9359	*
11	127749917	127759299	9383	*
11	53032221	53041659	9439	*
11	55030595	55040059	9465	*
11	55145701	55155379	9679	*
11	42878693	42888459	9767	*
11	50697001	50706769	9769	*
11	54359694	54369539	9846	*
11	54278381	54288287	9907	*
11	53773740	53783683	9944	*
11	39977916	39988150	10235	*
11	39388241	39398479	10239	*
11	52339145	52349554	10410	*
11	54298927	54309500	10574	*
11	55086909	55097674	10766	*
11	54008924	54020059	11136	*
11	54100741	54111924	11184	*
11	55071421	55082742	11322	*
11	53787721	53799422	11702	*
11	51110761	51122906	12146	*
11	48789761	48802030	12270	*
11	54130787	54143579	12793	*
11	54043690	54056500	12811	*
11	39520781	39534088	13308	*
11	54868081	54881419	13339	*
11	51127074	51140519	13446	*
11	22960701	22974257	13557	*
11	42427456	42441455	14000	*
11	53045702	53060059	14358	*
11	54948901	54963637	14737	*
11	54081531	54096445	14915	*
11	52985862	53000834	14973	*
11	54147676	54162819	15144	*
11	52877998	52893343	15346	*
11	54024188	54039601	15414	*
11	52192041	52208259	16219	*
11	42731949	42748198	16250	*
11	53816200	53832679	16480	*
11	52709750	52726316	16567	*
11	42680561	42697234	16674	*
11	53232321	53249329	17009	*
11	53141835	53159099	17265	*
11	54255919	54274299	18381	*
11	50467505	50486228	18724	*
11	54898628	54917906	19279	*
11	52371261	52390870	19610	*
11	52602837	52622519	19683	*
11	54967801	54987939	20139	*
11	52906821	52927920	21100	*
11	52429767	52450971	21205	*
11	53269280	53290508	21229	*
11	52577156	52598759	21604	*
11	50494681	50516339	21659	*
11	52833880	52856071	22192	*
11	50651581	50673899	22319	*
11	52635312	52657883	22572	*
11	54317946	54340610	22665	*
11	54224022	54247104	23083	*
11	53004951	53028068	23118	*
11	53082381	53105559	23179	*
11	55044090	55067299	23210	*
11	53110432	53133893	23462	*
11	53978312	54004071	25760	*
11	53595394	53621307	25914	*
11	52395021	52421162	26142	*
11	53925538	53952066	26529	*
11	53497797	53525477	27681	*
11	53852427	53880283	27857	*
11	55108639	55136959	28321	*
11	53356073	53385076	29004	*
11	54800180	54830902	30723	*
11	50520501	50552699	32199	*
11	50597776	50630671	32896	*
11	54993034	55026535	33502	*
11	52948134	52981766	33633	*
11	53886334	53921092	34759	*
11	52097763	52133939	36177	*
11	53676681	53714468	37788	*
11	53625422	53663491	38070	*
11	52053306	52093639	40334	*
11	51926192	51967497	41306	*
11	53718572	53764703	46132	*
11	48685787	48732379	46593	*
11	52138096	52185739	47644	*
11	54166945	54217159	50215	*
11	52455140	52506696	51557	*
11	53168381	53223496	55116	*
11	53535422	53591294	55873	*
11	53295175	53351899	56725	*
11	52513739	52573062	59324	*
11	51971575	52049179	77605	*
11	53389128	53481060	91933	*
11	52732293	52824633	92341	*
11	52212320	52318984	106665	*
11	54423381	54541479	118099	*
11	51617472	51747224	129753	*
11	51477875	51613359	135485	*
11	51751301	51922079	170779	*
11	50820801	51095439	274639	*
11	51149921	51455584	305664	*
12	36417322	36417339	18	*
12	41126341	41126359	19	*
12	82133426	82133454	29	*
12	29856241	29856277	37	*
12	28642801	28642839	39	*
12	88916212	88916259	48	*
12	17331370	17331419	50	*
12	73350861	73350919	59	*
12	61182866	61182936	71	*
12	90433094	90433179	86	*
12	30527501	30527599	99	*
12	74786998	74787096	99	*
12	60611281	60611399	119	*
12	28725709	28725830	122	*
12	35508774	35508919	146	*
12	30542693	30542839	147	*
12	17316741	17316903	163	*
12	83798846	83799019	174	*
12	74911821	74911999	179	*
12	87457719	87457899	181	*
12	23452490	23452679	190	*
12	82190145	82190337	193	*
12	36509742	36509939	198	*
12	83516681	83516879	199	*
12	87674041	87674239	199	*
12	102579420	102579619	200	*
12	37736361	37736579	219	*
12	61285341	61285559	219	*
12	73443561	73443779	219	*
12	60519841	60520061	221	*
12	29926945	29927179	235	*
12	87620502	87620739	238	*
12	60698481	60698721	241	*
12	16041357	16041607	251	*
12	41132541	41132799	259	*
12	59883961	59884219	259	*
12	59923821	59924085	265	*
12	88798721	88798990	270	*
12	105515781	105516062	282	*
12	61376975	61377259	285	*
12	72929644	72929938	295	*
12	33124001	33124298	298	*
12	33836981	33837279	299	*
12	83853099	83853399	301	*
12	23378525	23378832	308	*
12	61014308	61014621	314	*
12	90458461	90458779	319	*
12	20759117	20759442	326	*
12	88220721	88221047	327	*
12	61508930	61509259	330	*
12	83374930	83375259	330	*
12	30521787	30522119	333	*
12	20236165	20236499	335	*
12	36995664	36995999	336	*
12	30575421	30575759	339	*
12	36884270	36884618	349	*
12	23419304	23419659	356	*
12	78648597	78648959	363	*
12	102677981	102678359	379	*
12	17978486	17978879	394	*
12	37823941	37824339	399	*
12	36909241	36909640	400	*
12	125680898	125681307	410	*
12	30562061	30562479	419	*
12	60615801	60616219	419	*
12	85718314	85718743	430	*
12	82087026	82087459	434	*
12	59877679	59878119	441	*
12	61494101	61494553	453	*
12	91532199	91532672	474	*
12	40640841	40641323	483	*
12	59931861	59932347	487	*
12	23491241	23491739	499	*
12	16917121	16917654	534	*
12	72992262	72992819	558	*
12	42817361	42817919	559	*
12	105529741	105530299	559	*
12	63213719	63214279	561	*
12	37338741	37339319	579	*
12	18984861	18985459	599	*
12	82127281	82127883	603	*
12	87354573	87355179	607	*
12	72998221	72998850	630	*
12	82138290	82138928	639	*
12	73462441	73463081	641	*
12	73027261	73027908	648	*
12	67216315	67216965	651	*
12	36731607	36732259	653	*
12	107995143	107995799	657	*
12	60839380	60840046	667	*
12	83392581	83393253	673	*
12	85474458	85475139	682	*
12	34850141	34850825	685	*
12	60865741	60866439	699	*
12	60706841	60707543	703	*
12	83283336	83284039	704	*
12	36614684	36615393	710	*
12	86941567	86942279	713	*
12	85480521	85481239	719	*
12	84569566	84570299	734	*
12	61400761	61401496	736	*
12	60574989	60575732	744	*
12	87681552	87682299	748	*
12	38028221	38028998	778	*
12	61472761	61473538	778	*
12	37686061	37686839	779	*
12	60582384	60583170	787	*
12	37373681	37374479	799	*
12	87646541	87647339	799	*
12	36181702	36182519	818	*
12	59864257	59865079	823	*
12	34433741	34434588	848	*
12	37290961	37291811	851	*
12	83288261	83289119	859	*
12	83401321	83402179	859	*
12	34792568	34793437	870	*
12	72939801	72940679	879	*
12	78654081	78654959	879	*
12	84556641	84557522	882	*
12	102697201	102698096	896	*
12	43264018	43264919	902	*
12	92644575	92645476	902	*
12	33842961	33843865	905	*
12	82105542	82106459	918	*
12	34685621	34686539	919	*
12	33284661	33285599	939	*
12	73482798	73483739	942	*
12	16127541	16128494	954	*
12	61055083	61056039	957	*
12	23410021	23410999	979	*
12	72893221	72894201	981	*
12	82066666	82067663	998	*
12	88787402	88788399	998	*
12	86956861	86957859	999	*
12	60917961	60918960	1000	*
12	73345039	73346051	1013	*
12	58192860	58193879	1020	*
12	37057163	37058199	1037	*
12	17986481	17987519	1039	*
12	54904585	54905639	1055	*
12	61177621	61178679	1059	*
12	61516344	61517402	1059	*
12	101148317	101149376	1060	*
12	87591018	87592093	1076	*
12	72878443	72879539	1097	*
12	82195961	82197067	1107	*
12	33238401	33239510	1110	*
12	34880851	34881977	1127	*
12	34804521	34805654	1134	*
12	37368339	37369479	1141	*
12	36920449	36921590	1142	*
12	61381447	61382619	1173	*
12	90452261	90453499	1239	*
12	61464294	61465539	1246	*
12	83786770	83788019	1250	*
12	60663725	60664979	1255	*
12	41598561	41599859	1299	*
12	40627961	40629260	1300	*
12	87221161	87222466	1306	*
12	60721341	60722679	1339	*
12	83383008	83384359	1352	*
12	23438754	23440139	1386	*
12	37790701	37792099	1399	*
12	88841095	88842519	1425	*
12	34359674	34361114	1441	*
12	85431861	85433308	1448	*
12	73410161	73411637	1477	*
12	60504279	60505767	1489	*
12	73561721	73563220	1500	*
12	88347727	88349237	1511	*
12	33787847	33789361	1515	*
12	61134221	61135739	1519	*
12	87582461	87583999	1539	*
12	29834761	29836319	1559	*
12	84529361	84530919	1559	*
12	102586761	102588319	1559	*
12	36271402	36272966	1565	*
12	20753387	20754964	1578	*
12	102662218	102663799	1582	*
12	37256521	37258119	1599	*
12	102606454	102608082	1629	*
12	61164261	61165899	1639	*
12	72947081	72948719	1639	*
12	60509861	60511509	1649	*
12	60727281	60728936	1656	*
12	36371115	36372772	1658	*
12	37989841	37991509	1669	*
12	41083329	41085002	1674	*
12	73499098	73500779	1682	*
12	87563373	87565079	1707	*
12	63508901	63510626	1726	*
12	72853234	72854979	1746	*
12	73583700	73585471	1772	*
12	83273521	83275295	1775	*
12	83419400	83421179	1780	*
12	73525221	73527020	1800	*
12	84546229	84548053	1825	*
12	41115717	41117559	1843	*
12	60885001	60886859	1859	*
12	36608707	36610567	1861	*
12	36038274	36040139	1866	*
12	33630361	33632259	1899	*
12	34797541	34799444	1904	*
12	84052421	84054337	1917	*
12	34616301	34618219	1919	*
12	33298839	33300759	1921	*
12	85503121	85505041	1921	*
12	60973042	60974979	1938	*
12	36376801	36378750	1950	*
12	83900021	83901983	1963	*
12	33665241	33667219	1979	*
12	87359401	87361379	1979	*
12	17289181	17291199	2019	*
12	88849425	88851444	2020	*
12	74841737	74843761	2025	*
12	73540021	73542059	2039	*
12	60654281	60656339	2059	*
12	34609994	34612059	2066	*
12	60587961	60590032	2072	*
12	33229831	33231919	2089	*
[truncated: 10,768 more rows]

## Sheet: active regions
Supplementary File 1-2: Regions that pass active filters
seqnames	start	end	Fraction_of_HiC_samples_in_A.(21.in.total)	Start_gene	End_gene	EnsgID	Gene_name	Overlap_Compartment-Gene
2	27000001	28000000	1	27070472	27071773	ENSG00000228474.1	OST4	full_overlap
11	64000001	65000000	1	64318088	64321811	ENSG00000126432.9	PRDX5	full_overlap
11	65000001	66000000	1	65120628	65122473	ENSG00000149806.6	FAU	full_overlap
11	66000001	67000000	1	66268533	66277492	ENSG00000174903.10	RAB1B	full_overlap
12	53000001	54000000	1	53295291	53299450	ENSG00000123349.9	PFDN5	full_overlap
11	67000001	68000000	1	67606852	67612535	ENSG00000167792.7	NDUFV1	full_overlap
2	26000001	27000000	1	26190635	26244726	ENSG00000084754.6	HADHA	full_overlap
2	97000001	98000000	1	97646040	97648383	ENSG00000135940.2	COX5B	full_overlap
12	49000001	50000000	1	49707725	49764934	ENSG00000139644.8	TMBIM6	full_overlap
12	122000001	123000000	1	122980060	122982913	ENSG00000182196.9	ARL6IP4	full_overlap
1	32000001	33000000	1	32221928	32231604	ENSG00000084623.7	EIF3I	full_overlap
2	219000001	220000000	1	219171897	219178106	ENSG00000115649.11	CNPPD1	full_overlap
1	202000001	203000000	1	202940823	202958572	ENSG00000159346.8	ADIPOR1	full_overlap
12	6000001	7000000	1	6867119	6870948	ENSG00000111669.10	TPI1	full_overlap
1	154000001	155000000	1	154206706	154220637	ENSG00000143612.14	C1orf43	full_overlap
11	118000001	119000000	1	118401154	118431496	ENSG00000167283.3	ATP5L	full_overlap
12	51000001	52000000	1	51238292	51271362	ENSG00000183283.11	DAZAP2	full_overlap
2	70000001	71000000	1	70087454	70089203	ENSG00000169564.5	PCBP1	full_overlap
12	56000001	57000000	1	56638175	56646068	ENSG00000110955.4	ATP5B	full_overlap
1	150000001	151000000	1	150293720	150308979	ENSG00000187145.10	MRPS21	full_overlap
12	57000001	58000000	1	57530102	57547331	ENSG00000175203.11	DCTN2	full_overlap
5	176000001	177000000	1	176388747	176389771	ENSG00000146066.2	HIGD2A	full_overlap
7	128000001	129000000	1	128862826	128865844	ENSG00000128524.4	ATP6V1F	full_overlap
11	68000001	69000000	1	68030617	68036644	ENSG00000110717.6	NDUFS8	full_overlap
11	72000001	73000000	1	72085895	72103387	ENSG00000149357.5	LAMTOR1	full_overlap
6	31000001	32000000	1	31665236	31670343	ENSG00000204435.9	CSNK2B	full_overlap
1	156000001	157000000	1	156742107	156766925	ENSG00000143321.14	HDGF	full_overlap
1	26000001	27000000	1	26900238	26946862	ENSG00000090273.9	NUDC	full_overlap
2	74000001	75000000	1	74526645	74529939	ENSG00000115307.12	AUP1	full_overlap
1	22000001	23000000	1	22052627	22092946	ENSG00000070831.11	CDC42	full_overlap
1	155000001	156000000	1	155139891	155140595	ENSG00000179085.7	DPM3	full_overlap
7	101000001	102000000	1	101239458	101252316	ENSG00000214253.4	FIS1	full_overlap
12	121000001	122000000	1	121308245	121399896	ENSG00000089053.8	ANAPC5	full_overlap
6	30000001	31000000	1	30727709	30742733	ENSG00000137312.10	FLOT1	full_overlap
6	33000001	34000000	1	33416442	33418317	ENSG00000112514.11	CUTA	full_overlap
3	128000001	129000000	1	128726122	128814796	ENSG00000075785.8	RAB7A	full_overlap
2	202000001	203000000	1	202206180	202238608	ENSG00000116030.12	SUMO1	full_overlap
1	228000001	229000000	1	228082660	228099212	ENSG00000143761.9	ARF1	full_overlap
6	43000001	44000000	1	43014103	43021298	ENSG00000124702.13	KLHDC3	full_overlap
12	110000001	111000000	1	110719680	110742939	ENSG00000186298.7	PPP1CC	full_overlap
7	75000001	76000000	1	75986837	75994659	ENSG00000189077.6	TMEM120A	full_overlap
1	19000001	20000000	1	19338776	19485539	ENSG00000077549.13	CAPZB	full_overlap
1	151000001	152000000	1	151399534	151401944	ENSG00000159377.6	PSMB4	full_overlap
1	23000001	24000000	1	23778405	23788232	ENSG00000057757.5	PITHD1	full_overlap
1	27000001	28000000	1	27234516	27308633	ENSG00000142784.11	WDTC1	full_overlap
7	129000001	130000000	1	129830732	129952949	ENSG00000186591.7	UBE2H	full_overlap
1	36000001	37000000	1	36224416	36305357	ENSG00000054118.9	THRAP3	full_overlap
3	52000001	53000000	1	52704955	52711146	ENSG00000114902.9	SPCS1	full_overlap
3	48000001	49000000	1	48599002	48610976	ENSG00000010256.6	UQCRC1	full_overlap
3	184000001	185000000	1	184174689	184184091	ENSG00000161203.9	AP2M1	full_overlap
2	86000001	87000000	1	86143932	86195770	ENSG00000132305.16	IMMT	full_overlap
1	43000001	44000000	1	43974487	43978295	ENSG00000117410.9	ATP6V0B	full_overlap
7	99000001	100000000	1	99448475	99466331	ENSG00000241468.3	ATP5J2	full_overlap
1	46000001	47000000	1	46303631	46316776	ENSG00000173660.7	UQCRH	full_overlap
11	62000001	63000000	1	62676498	62679117	ENSG00000162191.9	UBXN1	full_overlap
2	238000001	239000000	1	238170401	238203729	ENSG00000132323.4	ILKAP	full_overlap
2	65000001	66000000	1	65070701	65130106	ENSG00000138069.12	RAB1A	full_overlap
1	31000001	32000000	1	31906421	31944856	ENSG00000184007.13	PTP4A2	full_overlap
11	61000001	62000000	1	61402641	61430031	ENSG00000149532.11	CPSF7	full_overlap
3	129000001	130000000	1	129169484	129183922	ENSG00000169714.12	CNBP	full_overlap
5	139000001	140000000	1	139526431	139628433	ENSG00000131508.11	UBE2D2	full_overlap
12	123000001	124000000	1	123620406	123633766	ENSG00000111361.8	EIF2B1	full_overlap
7	6000001	7000000	1	6374523	6403977	ENSG00000136238.13	RAC1	full_overlap
12	50000001	51000000	1	50084972	50100712	ENSG00000066117.10	SMARCD1	full_overlap
12	120000001	121000000	1	120533480	120577594	ENSG00000022840.11	RNF10	full_overlap
6	34000001	35000000	1	34587288	34696859	ENSG00000196821.5	C6orf106	full_overlap
1	54000001	55000000	1	54026681	54053504	ENSG00000116209.7	TMEM59	full_overlap
1	44000001	45000000	1	44221070	44355260	ENSG00000117419.10	ERI3	full_overlap
12	1000001	2000000	1	1688574	1788678	ENSG00000006831.9	ADIPOR2	full_overlap
1	25000001	26000000	1	25818640	25832942	ENSG00000117640.13	MTFR1L	full_overlap
11	2000001	3000000	1	2944431	2992377	ENSG00000205531.8	NAP1L4	full_overlap
10	104000001	105000000	1	104235356	104267459	ENSG00000148834.8	GSTO1	full_overlap
6	32000001	33000000	1	32968660	32981505	ENSG00000204256.8	BRD2	full_overlap
8	22000001	23000000	1	22604632	22621514	ENSG00000158941.12	CCAR2	full_overlap
1	110000001	111000000	1	110401249	110407942	ENSG00000134248.9	LAMTOR5	full_overlap
5	141000001	142000000	1	141260225	141320821	ENSG00000178913.5	TAF7	full_overlap
1	45000001	46000000	1	45012147	45015575	ENSG00000126088.8	UROD	full_overlap
2	85000001	86000000	1	85595725	85597613	ENSG00000168894.5	RNF181	full_overlap
9	35000001	36000000	1	35056064	35073249	ENSG00000165280.11	VCP	full_overlap
5	138000001	139000000	1	138352596	138437028	ENSG00000120733.9	KDM3B	full_overlap
10	73000001	74000000	1	73375101	73414076	ENSG00000138279.11	ANXA7	full_overlap
11	47000001	48000000	1	47418769	47426473	ENSG00000165916.4	PSMC3	full_overlap
1	7000001	8000000	1	7954291	7985505	ENSG00000116288.8	PARK7	full_overlap
7	44000001	45000000	1	44200968	44214294	ENSG00000106636.3	YKT6	full_overlap
9	136000001	137000000	1	136862119	136866286	ENSG00000107223.8	EDF1	full_overlap
7	5000001	6000000	1	5190188	5233826	ENSG00000157954.10	WIPI2	full_overlap
2	24000001	25000000	1	24491914	24770702	ENSG00000084676.11	NCOA1	full_overlap
10	71000001	72000000	1	71816298	71851375	ENSG00000197746.9	PSAP	full_overlap
3	183000001	184000000	1	183829271	183884933	ENSG00000175193.8	PARL	full_overlap
7	151000001	152000000	1	151076593	151080866	ENSG00000164896.15	FASTK	full_overlap
4	6000001	7000000	1	6640091	6642745	ENSG00000179010.10	MRFAP1	full_overlap
1	11000001	12000000	1	11919591	11926428	ENSG00000116685.11	KIAA2013	full_overlap
10	102000001	103000000	1	102644496	102658407	ENSG00000171206.9	TRIM8	full_overlap
1	40000001	41000000	1	40691648	40771603	ENSG00000066136.15	NFYC	full_overlap
1	203000001	204000000	1	203007386	203024848	ENSG00000163444.7	TMEM183A	full_overlap
6	108000001	109000000	1	108211222	108261260	ENSG00000112335.10	SNX3	full_overlap
11	73000001	74000000	1	73872667	73876988	ENSG00000181924.6	COA4	full_overlap
11	46000001	47000000	1	46617527	46674818	ENSG00000175224.12	ATG13	full_overlap
2	232000001	233000000	1	232550052	232583644	ENSG00000135930.9	EIF4E2	full_overlap
1	33000001	34000000	1	33007940	33080996	ENSG00000004455.12	AK2	full_overlap
14	103000001	104000000	1	103333544	103345025	ENSG00000100664.6	EIF5	full_overlap
12	54000001	55000000	1	54301202	54351849	ENSG00000111481.5	COPZ1	full_overlap
2	73000001	74000000	1	73926826	73958961	ENSG00000114956.15	DGUOK	full_overlap
3	47000001	48000000	1	47413694	47477126	ENSG00000114650.14	SCAP	full_overlap
16	89000001	90000000	1	89873570	89913627	ENSG00000141002.14	TCF25	full_overlap
1	226000001	227000000	1	226360691	226408079	ENSG00000143799.8	PARP1	full_overlap
11	119000001	120000000	1	119067692	119081978	ENSG00000160695.10	VPS11	full_overlap
6	42000001	43000000	1	42206801	42217865	ENSG00000048544.5	MRPS10	full_overlap
16	67000001	68000000	1	67438014	67481237	ENSG00000159720.7	ATP6V0D1	full_overlap
5	133000001	134000000	1	133051962	133106449	ENSG00000170606.9	HSPA4	full_overlap
8	124000001	125000000	1	124539103	124568510	ENSG00000147684.3	NDUFB9	full_overlap
3	9000001	10000000	1	9792495	9807726	ENSG00000241553.8	ARPC4	full_overlap
6	36000001	37000000	1	36871870	36928964	ENSG00000198663.12	C6orf89	full_overlap
2	233000001	234000000	1	233210051	233295674	ENSG00000085978.17	ATG16L1	full_overlap
18	46000001	47000000	1	46080248	46104334	ENSG00000152234.11	ATP5A1	full_overlap
9	34000001	35000000	1	34179005	34252523	ENSG00000165006.9	UBAP1	full_overlap
2	64000001	65000000	1	64524305	64593005	ENSG00000119844.10	AFTPH	full_overlap
16	69000001	70000000	1	69311356	69326939	ENSG00000132612.14	VPS4A	full_overlap
1	10000001	11000000	1	10032832	10181239	ENSG00000130939.14	UBE4B	full_overlap
3	195000001	196000000	1	195514425	195543386	ENSG00000184203.3	PPP1R2	full_overlap
15	43000001	44000000	1	43777087	43802589	ENSG00000140264.15	SERF2	full_overlap
10	72000001	73000000	1	72216000	72235860	ENSG00000166295.4	ANAPC16	full_overlap
17	41000001	42000000	1	41688885	41692668	ENSG00000173812.6	EIF1	full_overlap
15	64000001	65000000	1	64687573	64703281	ENSG00000180304.10	OAZ2	full_overlap
20	33000001	34000000	1	33811304	33854366	ENSG00000101421.3	CHMP4B	full_overlap
17	74000001	75000000	1	74203582	74210655	ENSG00000172809.8	RPL38	full_overlap
3	196000001	197000000	1	196739857	196832647	ENSG00000180370.6	PAK2	full_overlap
2	101000001	102000000	1	101252802	101270316	ENSG00000158435.3	CNOT11	full_overlap
2	46000001	47000000	1	46616416	46625742	ENSG00000119878.5	CRIPT	full_overlap
16	30000001	31000000	1	30350766	30355361	ENSG00000169217.4	CD2BP2	full_overlap
17	4000001	5000000	1	4796144	4798503	ENSG00000142507.5	PSMB6	full_overlap
17	7000001	8000000	1	7240014	7242770	ENSG00000170296.5	GABARAP	full_overlap
16	85000001	86000000	1	85798633	85807044	ENSG00000131143.4	COX4I1	full_overlap
11	74000001	75000000	1	74949247	74979031	ENSG00000118363.7	SPCS2	full_overlap
17	40000001	41000000	1	40140318	40172183	ENSG00000108349.10	CASC3	full_overlap
9	133000001	134000000	1	133351755	133356676	ENSG00000148290.5	SURF1	full_overlap
2	10000001	11000000	1	10570766	10689987	ENSG00000115761.11	NOL10	full_overlap
16	28000001	29000000	1	28842411	28846408	ENSG00000178952.4	TUFM	full_overlap
10	70000001	71000000	1	70404379	70428618	ENSG00000148730.6	EIF4EBP2	full_overlap
1	145000001	146000000	1	145964702	145978848	ENSG00000121851.8	POLR3GL	full_overlap
20	35000001	36000000	1	35699272	35700984	ENSG00000125995.11	ROMO1	full_overlap
14	75000001	76000000	1	75002911	75012366	ENSG00000119718.6	EIF2B2	full_overlap
5	1000001	2000000	1	1801400	1816605	ENSG00000145494.7	NDUFS6	full_overlap
15	41000001	42000000	1	41230839	41281890	ENSG00000187446.7	CHP1	full_overlap
1	20000001	21000000	1	20499448	20508161	ENSG00000090432.5	MUL1	full_overlap
17	42000001	43000000	1	42795147	42798704	ENSG00000183978.7	COA3	full_overlap
20	62000001	63000000	1	62136735	62143440	ENSG00000101182.10	PSMA7	full_overlap
9	128000001	129000000	1	128683424	128696400	ENSG00000119335.12	SET	full_overlap
13	28000001	29000000	1	28659104	28678925	ENSG00000132963.7	POMP	full_overlap
3	141000001	142000000	1	141738204	141747560	ENSG00000114125.9	RNF7	full_overlap
15	42000001	43000000	1	42158701	42208316	ENSG00000166887.11	VPS39	full_overlap
13	21000001	22000000	1	21140514	21149084	ENSG00000150459.8	SAP18	full_overlap
2	69000001	70000000	1	69893560	69905575	ENSG00000124380.6	SNRNP27	full_overlap
18	9000001	10000000	1	9102630	9134345	ENSG00000178127.8	NDUFV2	full_overlap
1	201000001	202000000	1	201955491	201970661	ENSG00000134375.6	TIMM17A	full_overlap
3	50000001	51000000	1	50320027	50328251	ENSG00000114383.5	TUSC2	full_overlap
1	53000001	54000000	1	53226892	53238610	ENSG00000162385.6	MAGOH	full_overlap
17	75000001	76000000	1	75038863	75046985	ENSG00000167863.7	ATP5H	full_overlap
15	74000001	75000000	1	74445977	74461182	ENSG00000138629.11	UBL7	full_overlap
15	75000001	76000000	1	75639085	75648706	ENSG00000177971.7	IMP3	full_overlap
1	9000001	10000000	1	9922113	9943407	ENSG00000162441.7	LZIC	full_overlap
2	25000001	26000000	1	25227855	25342590	ENSG00000119772.12	DNMT3A	full_overlap
4	39000001	40000000	1	39698044	39782792	ENSG00000078140.9	UBE2K	full_overlap
5	150000001	151000000	1	150690794	150701107	ENSG00000086589.7	RBM22	full_overlap
16	3000001	4000000	1	3443611	3486963	ENSG00000262621.2	NAA60	full_overlap
17	38000001	39000000	1	38752736	38764231	ENSG00000108294.4	PSMB3	full_overlap
1	205000001	206000000	1	205086142	205122015	ENSG00000117222.9	RBBP5	full_overlap
20	34000001	35000000	1	34516409	34540958	ENSG00000125971.12	DYNLRB1	full_overlap
1	52000001	53000000	1	52020131	52056171	ENSG00000117862.7	TXNDC12	full_overlap
3	127000001	128000000	1	127573069	127598251	ENSG00000163870.10	TPRA1	full_overlap
15	40000001	41000000	1	40035739	40039188	ENSG00000140319.6	SRP14	full_overlap
11	10000001	11000000	1	10750987	10779743	ENSG00000198730.3	CTR9	full_overlap
19	18000001	19000000	1	18571730	18577550	ENSG00000221983.3	UBA52	full_overlap
7	130000001	131000000	1	130070510	130135720	ENSG00000128607.9	KLHDC10	full_overlap
17	28000001	29000000	1	28347177	28357522	ENSG00000004142.7	POLDIP2	full_overlap
19	3000001	4000000	1	3976056	3985469	ENSG00000167658.11	EEF2	full_overlap
5	72000001	73000000	1	72219409	72320646	ENSG00000113048.12	MRPS27	full_overlap
12	109000001	110000000	1	109929792	109996389	ENSG00000139436.16	GIT2	full_overlap
17	1000001	2000000	1	1517718	1562816	ENSG00000174238.10	PITPNA	full_overlap
19	2000001	3000000	1	2269509	2273490	ENSG00000104904.8	OAZ1	full_overlap
9	135000001	136000000	1	135932969	135961380	ENSG00000130560.4	UBAC1	full_overlap
12	132000001	133000000	1	132489551	132585188	ENSG00000112787.8	FBRSL1	full_overlap
9	33000001	34000000	1	33817567	33920404	ENSG00000107341.4	UBE2R2	full_overlap
14	69000001	70000000	1	69050881	69153150	ENSG00000139990.13	DCAF5	full_overlap
19	4000001	5000000	1	4444999	4457822	ENSG00000167671.7	UBXN6	full_overlap
17	18000001	19000000	1	18183078	18209954	ENSG00000091542.8	ALKBH5	full_overlap
4	48000001	49000000	1	48805212	48861817	ENSG00000109180.10	OCIAD1	full_overlap
2	121000001	122000000	1	121737103	121767853	ENSG00000211460.7	TSN	full_overlap
20	3000001	4000000	1	3045945	3048254	ENSG00000125901.5	MRPS26	full_overlap
2	128000001	129000000	1	128091200	128195677	ENSG00000136731.8	UGGT1	full_overlap
14	100000001	101000000	1	100238298	100282792	ENSG00000100811.6	YY1	full_overlap
17	43000001	44000000	1	43170481	43211689	ENSG00000188554.9	NBR1	full_overlap
15	66000001	67000000	1	66386817	66492312	ENSG00000169032.5	MAP2K1	full_overlap
17	76000001	77000000	1	76038775	76072653	ENSG00000167881.10	SRP68	full_overlap
14	74000001	75000000	1	74713144	74738620	ENSG00000119616.7	FCF1	full_overlap
19	10000001	11000000	1	10391134	10420121	ENSG00000105401.2	CDC37	full_overlap
11	71000001	72000000	1	71928701	71997597	ENSG00000137522.13	RNF121	full_overlap
1	161000001	162000000	1	161152776	161158856	ENSG00000143222.7	UFC1	full_overlap
19	17000001	18000000	1	17933016	17943991	ENSG00000007080.6	CCDC124	full_overlap
4	7000001	8000000	1	7058906	7068197	ENSG00000109519.8	GRPEL1	full_overlap
16	4000001	5000000	1	4803203	4847342	ENSG00000140632.12	GLYR1	full_overlap
8	41000001	42000000	1	41490396	41510980	ENSG00000147533.12	GOLGA7	full_overlap
2	112000001	113000000	1	112584240	112589275	ENSG00000125611.11	CHCHD5	full_overlap
9	130000001	131000000	1	130053426	130140169	ENSG00000148358.15	GPR107	full_overlap
17	45000001	46000000	1	45051610	45109016	ENSG00000136448.7	NMT1	full_overlap
4	15000001	16000000	1	15604539	15681679	ENSG00000118564.10	FBXL5	full_overlap
16	87000001	88000000	1	87383995	87404779	ENSG00000140941.8	MAP1LC3B	full_overlap
21	44000001	45000000	1	44133605	44145723	ENSG00000160221.12	C21orf33	full_overlap
20	32000001	33000000	1	32109506	32167258	ENSG00000101337.11	TM9SF4	full_overlap
1	235000001	236000000	1	235367360	235448968	ENSG00000116957.8	TBCE	full_overlap
17	47000001	48000000	1	47649476	47685505	ENSG00000108424.5	KPNB1	full_overlap
17	17000001	18000000	1	17246820	17281293	ENSG00000141030.8	COPS3	full_overlap
8	38000001	39000000	1	38105242	38144076	ENSG00000129691.11	ASH2L	full_overlap
9	127000001	128000000	1	127935099	127938484	ENSG00000136908.13	DPM2	full_overlap
11	77000001	78000000	1	77514936	77637805	ENSG00000074201.4	CLNS1A	full_overlap
21	43000001	44000000	1	43092956	43107587	ENSG00000160201.7	U2AF1	full_overlap
19	5000001	6000000	1	5623035	5668478	ENSG00000160633.8	SAFB	full_overlap
6	41000001	42000000	1	41072945	41099976	ENSG00000001167.10	NFYA	full_overlap
1	6000001	7000000	1	6634168	6701924	ENSG00000007923.11	DNAJC11	full_overlap
16	88000001	89000000	1	88570381	88631966	ENSG00000158545.11	ZC3H18	full_overlap
8	28000001	29000000	1	28600469	28755599	ENSG00000012232.4	EXTL3	full_overlap
8	19000001	20000000	1	19817140	19852083	ENSG00000104613.7	INTS10	full_overlap
22	21000001	22000000	1	21549447	21624034	ENSG00000185651.10	UBE2L3	full_overlap
20	49000001	50000000	1	49936336	49953892	ENSG00000124226.7	RNF114	full_overlap
3	126000001	127000000	1	126437601	126475919	ENSG00000070476.10	ZXDC	full_overlap
6	37000001	38000000	1	37257772	37332970	ENSG00000065491.8	TBC1D22B	full_overlap
1	39000001	40000000	1	39692182	39763914	ENSG00000084072.12	PPIE	full_overlap
8	30000001	31000000	1	30678061	30727926	ENSG00000104687.8	GSR	full_overlap
22	24000001	25000000	1	24555503	24609980	ENSG00000100028.7	SNRPD3	full_overlap
14	65000001	66000000	1	65006174	65102695	ENSG00000125952.14	MAX	full_overlap
15	65000001	66000000	1	65148219	65185342	ENSG00000166855.5	CLPX	full_overlap
17	44000001	45000000	1	44205033	44221626	ENSG00000108312.10	UBTF	full_overlap
15	68000001	69000000	1	68778535	68820897	ENSG00000140350.11	ANP32A	full_overlap
14	23000001	24000000	1	23094765	23100462	ENSG00000179933.4	C14orf119	full_overlap
17	73000001	74000000	1	73192632	73208507	ENSG00000166685.7	COG1	full_overlap
15	72000001	73000000	1	72474326	72602985	ENSG00000166233.8	ARIH1	full_overlap
6	15000001	16000000	1	15522801	15663058	ENSG00000047579.15	DTNBP1	full_overlap
9	129000001	130000000	1	129827290	129835863	ENSG00000136819.10	C9orf78	full_overlap
10	1	1000000	1	806914	931705	ENSG00000107929.10	LARP4B	full_overlap
7	66000001	67000000	1	66114604	66154568	ENSG00000241258.2	CRCP	full_overlap
8	42000001	43000000	1	42541155	42555193	ENSG00000176209.7	SMIM19	full_overlap
16	70000001	71000000	1	70480568	70523565	ENSG00000103051.14	COG4	full_overlap
6	26000001	27000000	1	26596952	26600744	ENSG00000146109.3	ABT1	full_overlap
14	73000001	74000000	1	73136418	73223691	ENSG00000080815.14	PSEN1	full_overlap
11	9000001	10000000	1	9460319	9528524	ENSG00000166478.5	ZNF143	full_overlap
11	3000001	4000000	1	3000922	3057613	ENSG00000110619.12	CARS	full_overlap
4	184000001	185000000	1	184627696	184649509	ENSG00000164305.13	CASP3	full_overlap
14	102000001	103000000	1	102341102	102362916	ENSG00000100865.10	CINP	full_overlap
6	109000001	110000000	1	109691312	109825428	ENSG00000112367.6	FIG4	full_overlap
9	37000001	38000000	1	37422666	37436990	ENSG00000137106.13	GRHPR	full_overlap
2	61000001	62000000	1	61017225	61051990	ENSG00000162928.8	PEX13	full_overlap
3	125000001	126000000	1	125225561	125375354	ENSG00000163848.14	ZNF148	full_overlap
5	77000001	78000000	1	77029251	77065234	ENSG00000164252.8	AGGF1	full_overlap
16	11000001	12000000	1	11868128	11916082	ENSG00000103342.8	GSPT1	full_overlap
10	13000001	14000000	1	13317424	13348298	ENSG00000086475.10	SEPHS1	full_overlap
9	132000001	133000000	1	132375548	132406851	ENSG00000125482.8	TTF1	full_overlap
15	67000001	68000000	1	67201033	67255195	ENSG00000103591.8	AAGAB	full_overlap
2	11000001	12000000	1	11444375	11466177	ENSG00000169016.12	E2F6	full_overlap
6	13000001	14000000	1	13615327	13632739	ENSG00000225921.2	NOL7	full_overlap
6	44000001	45000000	1	44387525	44450426	ENSG00000096401.7	CDC5L	full_overlap
3	15000001	16000000	1	15427355	15450635	ENSG00000144597.9	EAF1	full_overlap
3	122000001	123000000	1	122421949	122514945	ENSG00000114030.8	KPNA1	full_overlap
9	97000001	98000000	1	97633626	97673748	ENSG00000136937.8	NCBP1	full_overlap
3	45000001	46000000	1	45388506	45549421	ENSG00000011376.5	LARS2	full_overlap
4	4000001	5000000	1	4415742	4542346	ENSG00000168818.5	STX18	full_overlap
2	44000001	45000000	1	44361950	44772592	ENSG00000143919.10	CAMKMT	full_overlap
21	46000001	47000000	1	46235126	46286297	ENSG00000160294.6	MCM3AP	full_overlap
8	125000001	126000000	1	125091679	125367120	ENSG00000156831.3	NSMCE2	full_overlap
3	11000001	12000000	1	11272309	11557665	ENSG00000197548.8	ATG7	full_overlap
14	35000001	36000000	1	35044907	35113130	ENSG00000151327.8	FAM177A1	full_overlap
6	3000001	4000000	1	3231403	3303373	ENSG00000180822.7	PSMG4	full_overlap
16	84000001	85000000	1	84699978	84779922	ENSG00000103194.11	USP10	full_overlap
15	63000001	64000000	1	63608618	63833942	ENSG00000103657.9	HERC1	full_overlap
17	48000001	49000000	1	48929316	48945117	ENSG00000159210.5	SNF8	full_overlap
14	50000001	51000000	1	50117120	50231558	ENSG00000100485.7	SOS2	full_overlap
9	134000001	135000000	1	134030305	134068535	ENSG00000169925.12	BRD3	full_overlap
15	77000001	78000000	1	77420412	77485607	ENSG00000140382.10	HMG20A	full_overlap
6	38000001	39000000	1	38168451	38640148	ENSG00000183826.12	BTBD9	full_overlap
16	68000001	69000000	1	68310974	68358563	ENSG00000132600.12	PRMT7	full_overlap
5	55000001	56000000	1	55625845	55773194	ENSG00000177058.7	SLC38A9	full_overlap
6	16000001	17000000	1	16299112	16761491	ENSG00000124788.13	ATXN1	full_overlap
3	57000001	58000000	1	57556276	57566844	ENSG00000174840.8	PDE12	full_overlap
17	29000001	30000000	1	29390464	29551904	ENSG00000160551.5	TAOK1	full_overlap
14	76000001	77000000	1	76151916	76254342	ENSG00000089916.13	GPATCH2L	full_overlap
17	37000001	38000000	1	37514797	37609496	ENSG00000006114.11	SYNRG	full_overlap
4	41000001	42000000	1	41935120	41960572	ENSG00000109133.8	TMEM33	full_overlap
15	90000001	91000000	1	90929964	90932569	ENSG00000184508.6	HDDC3	full_overlap
4	56000001	57000000	1	56963370	56978823	ENSG00000084092.6	NOA1	full_overlap
21	37000001	38000000	1	37365790	37517450	ENSG00000157540.15	DYRK1A	full_overlap
18	56000001	57000000	1	56597208	56651600	ENSG00000091164.8	TXNL1	full_overlap
17	80000001	81000000	1	80544819	80966371	ENSG00000141564.9	RPTOR	full_overlap
4	17000001	18000000	1	17614631	17634105	ENSG00000118579.7	MED28	full_overlap
9	95000001	96000000	1	95759231	95875977	ENSG00000175611.7	LINC00476	full_overlap
14	105000001	106000000	1	105209286	105315589	ENSG00000185024.11	BRF1	full_overlap
9	36000001	37000000	1	36303499	36304924	ENSG00000215283.3	HMGB3P24	full_overlap
18	12000001	13000000	1	12947133	12987536	ENSG00000085415.11	SEH1L	full_overlap
21	42000001	43000000	1	42879644	42913304	ENSG00000160194.13	NDUFV3	full_overlap
17	62000001	63000000	1	62458658	62615481	ENSG00000146872.13	TLK2	full_overlap
15	78000001	79000000	1	78507564	78537372	ENSG00000188266.9	HYKK	full_overlap
17	1	1000000	1	508668	721717	ENSG00000141252.15	VPS53	full_overlap
9	126000001	127000000	1	126860665	126885878	ENSG00000177125.5	ZBTB34	full_overlap
21	39000001	40000000	1	39184176	39321559	ENSG00000185658.9	BRWD1	full_overlap
17	30000001	31000000	1	30477362	30527592	ENSG00000108587.10	GOSR1	full_overlap
7	105000001	106000000	1	105582258	105583256	ENSG00000231167.3	YBX1P2	full_overlap
21	36000001	37000000	1	36130489	36131376	ENSG00000226054.1	MEMO1P1	full_overlap
21	41000001	42000000	1	41798225	41879482	ENSG00000141956.9	PRDM15	full_overlap
19	1000001	2000000	0.95238095199999995	1438358	1440494	ENSG00000115268.5	RPS15	full_overlap
11	63000001	64000000	0.95238095199999995	63974607	63976543	ENSG00000176340.3	COX8A	full_overlap
16	2000001	3000000	0.95238095199999995	2513870	2520218	ENSG00000185883.6	ATP6V0C	full_overlap
7	100000001	101000000	0.95238095199999995	100673531	100679174	ENSG00000172354.5	GNB2	full_overlap
4	1	1000000	0.95238095199999995	672436	674338	ENSG00000169020.5	ATP5I	full_overlap
16	1000001	2000000	0.95238095199999995	1959508	1961975	ENSG00000140990.10	NDUFB10	full_overlap
8	144000001	145000000	0.95238095199999995	144095027	144097525	ENSG00000179091.4	CYC1	full_overlap
4	2000001	3000000	0.95238095199999995	2843857	2930076	ENSG00000087274.12	ADD1	full_overlap
9	137000001	138000000	0.95238095199999995	137110542	137115177	ENSG00000176978.9	DPP7	full_overlap
19	47000001	48000000	0.95238095199999995	47487637	47515240	ENSG00000105402.3	NAPA	full_overlap
19	13000001	14000000	0.95238095199999995	13774168	13778462	ENSG00000104979.4	C19orf53	full_overlap
19	11000001	12000000	0.95238095199999995	11435288	11450968	ENSG00000130175.5	PRKCSH	full_overlap
2	218000001	219000000	0.95238095199999995	218264123	218270257	ENSG00000127837.5	AAMP	full_overlap
1	29000001	30000000	0.95238095199999995	29147743	29181987	ENSG00000116350.11	SRSF4	full_overlap
3	12000001	13000000	0.95238095199999995	12583601	12664226	ENSG00000132155.7	RAF1	full_overlap
19	46000001	47000000	0.95238095199999995	46838136	46850992	ENSG00000042753.7	AP2S1	full_overlap
9	124000001	125000000	0.95238095199999995	124353466	124415444	ENSG00000136930.8	PSMB7	full_overlap
19	39000001	40000000	0.95238095199999995	39436156	39476670	ENSG00000196235.9	SUPT5H	full_overlap
16	1	1000000	0.95238095199999995	680224	682870	ENSG00000103266.6	STUB1	full_overlap
16	29000001	30000000	0.95238095199999995	29940885	29973052	ENSG00000149932.12	TMEM219	full_overlap
10	99000001	100000000	0.95238095199999995	99610522	99620609	ENSG00000155287.6	SLC25A28	full_overlap
19	49000001	50000000	0.95238095199999995	49877425	49888749	ENSG00000104946.6	TBC1D17	full_overlap
14	104000001	105000000	0.95238095199999995	104769349	104795751	ENSG00000142208.11	AKT1	full_overlap
1	28000001	29000000	0.95238095199999995	28236109	28246906	ENSG00000130770.13	ATPIF1	full_overlap
17	2000001	3000000	0.95238095199999995	2593210	2685615	ENSG00000007168.8	PAFAH1B1	full_overlap
3	49000001	50000000	0.95238095199999995	49020459	49023495	ENSG00000178057.10	NDUFAF3	full_overlap
22	20000001	21000000	0.95238095199999995	20314276	20320080	ENSG00000128185.5	DGCR6L	full_overlap
6	149000001	150000000	0.95238095199999995	149749443	149811420	ENSG00000120265.12	PCMT1	full_overlap
5	134000001	135000000	0.95238095199999995	134371179	134391992	ENSG00000119048.3	UBE2B	full_overlap
1	17000001	18000000	0.95238095199999995	17018722	17054170	ENSG00000117118.5	SDHB	full_overlap
14	24000001	25000000	0.95238095199999995	24209583	24213869	ENSG00000254505.4	CHMP4A	full_overlap
13	27000001	28000000	0.95238095199999995	27424544	27435823	ENSG00000122034.8	GTF3A	full_overlap
16	57000001	58000000	0.95238095199999995	57462387	57472010	ENSG00000102978.8	POLR2C	full_overlap
12	48000001	49000000	0.95238095199999995	48829764	48852842	ENSG00000174243.5	DDX23	full_overlap
2	241000001	242000000	0.95238095199999995	241492674	241509730	ENSG00000115694.10	STK25	full_overlap
7	73000001	74000000	0.95238095199999995	73536356	73558002	ENSG00000106635.3	BCL7B	full_overlap
3	46000001	47000000	0.95238095199999995	46921726	46982010	ENSG00000160799.7	CCDC12	full_overlap
8	102000001	103000000	0.95238095199999995	102826357	102893864	ENSG00000155096.9	AZIN1	full_overlap
1	212000001	213000000	0.95238095199999995	212285537	212361863	ENSG00000066027.7	PPP2R5A	full_overlap
4	1000001	2000000	0.95238095199999995	1715952	1721358	ENSG00000168936.6	TMEM129	full_overlap
7	1000001	2000000	0.95238095199999995	1470277	1504367	ENSG00000164880.11	INTS1	full_overlap
1	229000001	230000000	0.95238095199999995	229271062	229305894	ENSG00000168118.7	RAB4A	full_overlap
9	131000001	132000000	0.95238095199999995	131576770	131740074	ENSG00000107263.14	RAPGEF1	full_overlap
3	149000001	150000000	0.95238095199999995	149812708	149962139	ENSG00000082996.15	RNF13	full_overlap
2	174000001	175000000	0.95238095199999995	174348022	174395715	ENSG00000138433.11	CIR1	full_overlap
11	1000001	2000000	0.95238095199999995	1274371	1309654	ENSG00000078902.11	TOLLIP	full_overlap
5	1	1000000	0.95238095199999995	443158	471937	ENSG00000180104.11	EXOC3	full_overlap
4	3000001	4000000	0.95238095199999995	3506376	3532559	ENSG00000163956.6	LRPAP1	full_overlap
4	53000001	54000000	0.95238095199999995	53377643	53460861	ENSG00000145216.11	FIP1L1	full_overlap
13	32000001	33000000	0.95238095199999995	32432417	32538885	ENSG00000244754.4	N4BP2L2	full_overlap
5	179000001	180000000	0.95238095199999995	179550558	179610026	ENSG00000176783.10	RUFY1	full_overlap
4	25000001	26000000	0.95238095199999995	25861830	25929874	ENSG00000250317.4	SMIM20	full_overlap
6	17000001	18000000	0.95238095199999995	17600355	17611719	ENSG00000137414.5	FAM8A1	full_overlap
12	116000001	117000000	0.95238095199999995	116548105	116576448	ENSG00000171471.5	MAP1LC3B2	full_overlap
8	23000001	24000000	0.95238095199999995	23270120	23296279	ENSG00000104679.6	R3HCC1	full_overlap
6	2000001	3000000	0.95238095199999995	2765414	2786952	ENSG00000124535.11	WRNIP1	full_overlap
4	83000001	84000000	0.95238095199999995	83034447	83075818	ENSG00000138663.4	COPS4	full_overlap
3	37000001	38000000	0.95238095199999995	37052656	37183689	ENSG00000093167.13	LRRFIP2	full_overlap
11	117000001	118000000	0.95238095199999995	117144267	117176894	ENSG00000168092.9	PAFAH1B2	full_overlap
1	113000001	114000000	0.95238095199999995	113929192	113977869	ENSG00000163349.17	HIPK1	full_overlap
18	10000001	11000000	0.95238095199999995	10525905	10552761	ENSG00000134265.8	NAPG	full_overlap
12	111000001	112000000	0.95238095199999995	111841978	111902238	ENSG00000089022.9	MAPKAPK5	full_overlap
6	7000001	8000000	0.95238095199999995	7268306	7347446	ENSG00000124783.8	SSR1	full_overlap
5	148000001	149000000	0.95238095199999995	148383935	148442836	ENSG00000145868.12	FBXO38	full_overlap
11	45000001	46000000	0.95238095199999995	45909669	45918812	ENSG00000121680.11	PEX16	full_overlap
2	55000001	56000000	0.95238095199999995	55236595	55269347	ENSG00000085760.10	MTIF2	full_overlap
2	113000001	114000000	0.95238095199999995	113588550	113599043	ENSG00000146556.10	WASH2P	full_overlap
13	40000001	41000000	0.95238095199999995	40729135	40771173	ENSG00000102738.6	MRPS31	full_overlap
3	185000001	186000000	0.95238095199999995	185582496	185633551	ENSG00000163904.8	SENP2	full_overlap
11	70000001	71000000	0.95238095199999995	70270700	70384403	ENSG00000131626.11	PPFIA1	full_overlap
2	231000001	232000000	0.95238095199999995	231732425	231786272	ENSG00000156973.9	PDE6D	full_overlap
3	138000001	139000000	0.95238095199999995	138187248	138298389	ENSG00000114098.13	ARMC8	full_overlap
1	227000001	228000000	0.95238095199999995	227728539	227781231	ENSG00000143740.10	SNAP47	full_overlap
6	1	1000000	0.95238095199999995	485133	693111	ENSG00000112685.9	EXOC2	full_overlap
5	65000001	66000000	0.95238095199999995	65624716	65666233	ENSG00000113597.13	TRAPPC13	full_overlap
2	37000001	38000000	0.95238095199999995	37231631	37253403	ENSG00000003509.11	NDUFAF7	full_overlap
5	80000001	81000000	0.95238095199999995	80408013	80479350	ENSG00000039319.12	ZFYVE16	full_overlap
5	131000001	132000000	0.95238095199999995	131641714	131797063	ENSG00000217128.7	FNIP1	full_overlap
18	74000001	75000000	0.95238095199999995	74148511	74160530	ENSG00000075336.7	TIMM21	full_overlap
2	208000001	209000000	0.95238095199999995	208266267	208358751	ENSG00000115020.12	PIKFYVE	full_overlap
7	1	1000000	0.95238095199999995	898778	975599	ENSG00000240230.1	COX19	full_overlap
7	98000001	99000000	0.95238095199999995	98106885	98209633	ENSG00000164715.5	LMTK2	full_overlap
7	4000001	5000000	0.95238095199999995	4682309	4771443	ENSG00000164916.9	FOXK1	full_overlap
6	157000001	158000000	0.95238095199999995	157289386	157323601	ENSG00000215712.6	TMEM242	full_overlap
11	69000001	70000000	0.95238095199999995	69653076	69675416	ENSG00000149716.8	ORAOV1	full_overlap
13	41000001	42000000	0.95238095199999995	41566837	41961120	ENSG00000102763.11	VWA8	full_overlap
2	111000001	112000000	0.95238095199999995	111766271	111884690	ENSG00000153107.7	ANAPC1	full_overlap
8	11000001	12000000	0.95238095199999995	11284416	11328146	ENSG00000104643.5	MTMR9	full_overlap
5	70000001	71000000	0.95238095199999995	70925030	70953942	ENSG00000172062.12	SMN1	full_overlap
14	31000001	32000000	0.95238095199999995	31489956	31861224	ENSG00000151413.12	NUBPL	full_overlap
9	94000001	95000000	0.95238095199999995	94259311	94301454	ENSG00000175787.12	ZNF169	full_overlap
5	14000001	15000000	0.95238095199999995	14797125	14798400	ENSG00000249485.1	RBBP4P1	full_overlap
12	133000001	134000000	0.95238095199999995	133106817	133130473	ENSG00000214029.3	ZNF891	full_overlap

## Sheet: overlap safe-active
Supplementary File 1-3: Overlap of safe sites and active regions
chr	start	end	width	active_start	active_end	active_width	Fraction_of_HiC_samples_in_A..21.in.total.	Start_gene	End_gene	EnsgID	Gene_name	Overlap_Compartment.Gene	BLAT score (2nd_hit/1st_hit)			= fails BLAT screening
1	113289036	113289342	307	113000001	114000000	1000000	0.95238095199999995	113929192	113977869	ENSG00000163349.17	HIPK1	full_overlap	0.211726			= candidate sub-divided for BLAT screening
1	113314841	113318369	3529	113000001	114000000	1000000	0.95238095199999995	113929192	113977869	ENSG00000163349.17	HIPK1	full_overlap	0.184472
1	113339961	113340514	554	113000001	114000000	1000000	0.95238095199999995	113929192	113977869	ENSG00000163349.17	HIPK1	full_overlap	0.268953
1	203576081	203576184	104	203000001	204000000	1000000	1	203007386	203024848	ENSG00000163444.7	TMEM183A	full_overlap	0.971154
2	10997927	11002299	4373	10000001	11000000	1000000	1	10570766	10689987	ENSG00000115761.11	NOL10	full_overlap	0.951292
2	128763001	128763459	459	128000001	129000000	1000000	1	128091200	128195677	ENSG00000136731.8	UGGT1	full_overlap	0.777778
2	128826301	128826760	460	128000001	129000000	1000000	1	128091200	128195677	ENSG00000136731.8	UGGT1	full_overlap	0.680435
2	128844521	128844603	83	128000001	129000000	1000000	1	128091200	128195677	ENSG00000136731.8	UGGT1	full_overlap	0.566265
2	128849731	128854299	4569	128000001	129000000	1000000	1	128091200	128195677	ENSG00000136731.8	UGGT1	full_overlap	0.869775
2	128860861	128863166	2306	128000001	129000000	1000000	1	128091200	128195677	ENSG00000136731.8	UGGT1	full_overlap	0.983521
2	128912721	128914814	2094	128000001	129000000	1000000	1	128091200	128195677	ENSG00000136731.8	UGGT1	full_overlap	0.0835721
2	128918961	128919839	879	128000001	129000000	1000000	1	128091200	128195677	ENSG00000136731.8	UGGT1	full_overlap	0.155859
2	128932307	128935799	3493	128000001	129000000	1000000	1	128091200	128195677	ENSG00000136731.8	UGGT1	full_overlap	0.149155
2	128944101	128947447	3347	128000001	129000000	1000000	1	128091200	128195677	ENSG00000136731.8	UGGT1	full_overlap	0.896923
2	128963272	128965759	2488	128000001	129000000	1000000	1	128091200	128195677	ENSG00000136731.8	UGGT1	full_overlap	0.439711
2	208992998	208997459	4462	208000001	209000000	1000000	0.95238095199999995	208266267	208358751	ENSG00000115020.12	PIKFYVE	full_overlap	0.276109
4	17373361	17374159	799	17000001	18000000	1000000	1	17614631	17634105	ENSG00000118579.7	MED28	full_overlap	0.0413016
5	70310758	70324031	13273	70000001	71000000	1000000	0.95238095199999995	70925030	70953942	ENSG00000172062.12	SMN1	full_overlap	0.996007
5	70324032	70337302	13272	70000001	71000000	1000000	0.95238095199999995	70925030	70953942	ENSG00000172062.12	SMN1	full_overlap	0.996986
5	70341381	70349635	8255	70000001	71000000	1000000	0.95238095199999995	70925030	70953942	ENSG00000172062.12	SMN1	full_overlap	0.99891
5	70605268	70627599	22332	70000001	71000000	1000000	0.95238095199999995	70925030	70953942	ENSG00000172062.12	SMN1	full_overlap	0.997761
5	70631716	70633999	2284	70000001	71000000	1000000	0.95238095199999995	70925030	70953942	ENSG00000172062.12	SMN1	full_overlap	0.989054
5	70638121	70657352	19232	70000001	71000000	1000000	0.95238095199999995	70925030	70953942	ENSG00000172062.12	SMN1	full_overlap	0.997348
5	70661501	70671422	19842	70000001	71000000	1000000	0.95238095199999995	70925030	70953942	ENSG00000172062.12	SMN1	full_overlap	0.997682
5	70671423	70701183	19841	70000001	71000000	1000000	0.95238095199999995	70925030	70953942	ENSG00000172062.12	SMN1	full_overlap	0.995061
5	131058585	131058947	363	131000001	132000000	1000000	0.95238095199999995	131641714	131797063	ENSG00000217128.7	FNIP1	full_overlap	0.413223
5	131074201	131074411	211	131000001	132000000	1000000	0.95238095199999995	131641714	131797063	ENSG00000217128.7	FNIP1	full_overlap	0.985782
5	131089605	131092879	3275	131000001	132000000	1000000	0.95238095199999995	131641714	131797063	ENSG00000217128.7	FNIP1	full_overlap	0.916031
5	148753741	148757219	3479	148000001	149000000	1000000	0.95238095199999995	148383935	148442836	ENSG00000145868.12	FBXO38	full_overlap	0.0971544
6	1	22562	22562	1	1000000	1000000	0.95238095199999995	485133	693111	ENSG00000112685.9	EXOC2	full_overlap	1
6	22563	45123	22561	1	1000000	1000000	0.95238095199999995	485133	693111	ENSG00000112685.9	EXOC2	full_overlap	1
6	15727241	15727490	250	15000001	16000000	1000000	1	15522801	15663058	ENSG00000047579.15	DTNBP1	full_overlap	0.468
6	26786243	26796887	21289	26000001	27000000	1000000	1	26596952	26600744	ENSG00000146109.3	ABT1	full_overlap	0.99875
6	26796888	26828819	21288	26000001	27000000	1000000	1	26596952	26600744	ENSG00000146109.3	ABT1	full_overlap	0.999375
7	4314741	4315279	539	4000001	5000000	1000000	0.95238095199999995	4682309	4771443	ENSG00000164916.9	FOXK1	full_overlap	0.153989
7	4321017	4323839	2823	4000001	5000000	1000000	0.95238095199999995	4682309	4771443	ENSG00000164916.9	FOXK1	full_overlap	0.0853702
7	4328040	4329659	1620	4000001	5000000	1000000	0.95238095199999995	4682309	4771443	ENSG00000164916.9	FOXK1	full_overlap	0.214815
7	4353504	4354219	716	4000001	5000000	1000000	0.95238095199999995	4682309	4771443	ENSG00000164916.9	FOXK1	full_overlap	0.324022
7	4441761	4442103	343	4000001	5000000	1000000	0.95238095199999995	4682309	4771443	ENSG00000164916.9	FOXK1	full_overlap	0.976676
7	4454808	4456201	1394	4000001	5000000	1000000	0.95238095199999995	4682309	4771443	ENSG00000164916.9	FOXK1	full_overlap	0.170014
7	98542781	98542797	17	98000001	99000000	1000000	0.95238095199999995	98106885	98209633	ENSG00000164715.5	LMTK2	full_overlap	1
8	23945241	23945819	579	23000001	24000000	1000000	0.95238095199999995	23270120	23296279	ENSG00000104679.6	R3HCC1	full_overlap	0.336788
8	23986981	23988319	1339	23000001	24000000	1000000	0.95238095199999995	23270120	23296279	ENSG00000104679.6	R3HCC1	full_overlap	0.0575056
8	23999628	24001194	1567	23000001	24000000	1000000	0.95238095199999995	23270120	23296279	ENSG00000104679.6	R3HCC1	full_overlap	0.0204212
10	71110486	71110533	48	71000001	72000000	1000000	1	71816298	71851375	ENSG00000197746.9	PSAP	full_overlap	0.770833
12	54904585	54905639	1055	54000001	55000000	1000000	1	54301202	54351849	ENSG00000111481.5	COPZ1	full_overlap	0.917536
18	56339813	56340245	433	56000001	57000000	1000000	1	56597208	56651600	ENSG00000091164.8	TXNL1	full_overlap	0.0554273
18	56396821	56397319	499	56000001	57000000	1000000	1	56597208	56651600	ENSG00000091164.8	TXNL1	full_overlap	0.0721443
18	56410681	56411039	359	56000001	57000000	1000000	1	56597208	56651600	ENSG00000091164.8	TXNL1	full_overlap	0.144847
18	56417271	56419036	1766	56000001	57000000	1000000	1	56597208	56651600	ENSG00000091164.8	TXNL1	full_overlap	0.925821
18	56526202	56530259	4058	56000001	57000000	1000000	1	56597208	56651600	ENSG00000091164.8	TXNL1	full_overlap	0.905619
18	56534775	56536439	1665	56000001	57000000	1000000	1	56597208	56651600	ENSG00000091164.8	TXNL1	full_overlap	0.156156
19	5400761	5402139	1379	5000001	6000000	1000000	1	5623035	5668478	ENSG00000160633.8	SAFB	full_overlap	0.179115
