# Supplementary material for: Computationally defined and in vitro validated putative genomic safe harbour loci for transgene expression in human cells
Source: eLife. 2024 Jan 2;13:e79592. doi: 10.7554/eLife.79592 (PMC10836832; doi:10.7554/eLife.79592)
Supplement: Supplementary file 3. — (1) Summary of GSH targeted hESC clones screening. (2) ddPCR copy number analysis. [file elife-79592-supp3.xlsx]

## Sheet: summary of clone screening
	Supplementary File 3-1: Summary of GSH targeted hESC clones screening
	H1 Clones screened for integration
	GSH	1	2a	2c	4	6	18	19
	# clones	7	2	3	1	-	9	10
	junct PCR	6	-	-	-	-	9	10
	ddPCR	1	-	-	-	-	5	2
	H9 Clones screened for integration
	GSH	1	18	19
	# clones	10	9	12
	junct PCR	9	9	11
	ddPCR	2	3	5

## Sheet: ddPCR data
	Supplementary File 3-2: ddPCR copy number analysis
	Well	H1 Sample	AcceptedDroplets	Target (Reference)	Positives	Target (GOI)	Positives	Fold difference (GOI/Reference Positives)	Average	Normalised copy number (Average)
	A01	NTC (Replicate 1)	12453	RPP30	0	Blasticidin	0	0	0	NA			= untargeted H1 cells
	B01	NTC (Replicate 2)	12599	RPP30	0	Blasticidin	0	0		NA			= control targeted H1 cells with known single Bsd integration
	G09	H1 WT (Replicate 1)	16712	RPP30	311	Blasticidin	9	0.0289389	0.0225666	0.0390656			= GSH candidate clones with copy number ≈1
	H09	H1 WT (Replicate 2)	12833	RPP30	247	Blasticidin	4	0.0161943
	E08	H1 Ctr 1 (Replicate 1)	15383	RPP30	367	Blasticidin	204	0.555858	0.57766	1
	F08	H1 Ctr 1 (Replicate 2)	15138	RPP30	372	Blasticidin	223	0.599462
	G08	H1 Ctr 2 (Replicate 1)	17755	RPP30	484	Blasticidin	213	0.440083	0.429719	0.743895
	H08	H1 Ctr 2 (Replicate 2)	17766	RPP30	496	Blasticidin	208	0.419355
	C01	1-1 (Replicate 1)	14637	RPP30	250	Blasticidin	595	2.38	2.43299	4.2118
	D01	1-1 (Replicate 2)	14018	RPP30	321	Blasticidin	798	2.48598
	E01	1-2 (Replicate 1)	12618	RPP30	319	Blasticidin	282	0.884013	0.852948	1.47656
	F01	1-2 (Replicate 2)	14700	RPP30	393	Blasticidin	323	0.821883
	G01	1-3 (Replicate 1)	12532	RPP30	344	Blasticidin	496	1.44186	1.44954	2.50934
	H01	1-3 (Replicate 2)	11798	RPP30	339	Blasticidin	494	1.45723
	A02	1-4 (Replicate 1)	13726	RPP30	371	Blasticidin	534	1.43935	1.43808	2.4895
	B02	1-4 (Replicate 2)	12835	RPP30	364	Blasticidin	523	1.43681
	C02	1-5 (Replicate 1)	13170	RPP30	313	Blasticidin	525	1.67732	1.65343	2.86228
	D02	1-5 (Replicate 2)	15639	RPP30	413	Blasticidin	673	1.62954
	E02	1-7 (Replicate 1)	12584	RPP30	383	Blasticidin	263	0.686684	0.731373	1.2661
	F02	1-7 (Replicate 2)	17115	RPP30	518	Blasticidin	402	0.776062
	G02	18-1 (Replicate 1)	13925	RPP30	371	Blasticidin	253	0.681941	0.704114	1.21891
	H02	18-1 (Replicate 2)	14806	RPP30	369	Blasticidin	268	0.726287
	A03	18-2 (Replicate 1)	12319	RPP30	316	Blasticidin	236	0.746835	0.732113	1.26738
	B03	18-2 (Replicate 2)	13817	RPP30	368	Blasticidin	264	0.717391
	C03	18-3 (Replicate 1)	15053	RPP30	448	Blasticidin	1252	2.79464	2.86825	4.96529
	D03	18-3 (Replicate 2)	14266	RPP30	430	Blasticidin	1265	2.94186
	E03	18-4 (Replicate 1)	16847	RPP30	395	Blasticidin	729	1.84557	1.9579	3.38936
	F03	18-4 (Replicate 2)	15664	RPP30	356	Blasticidin	737	2.07022
	A04	18-5 (Replicate 1)	12916	RPP30	319	Blasticidin	765	2.39812	2.30133	3.98388
	B04	18-5 (Replicate 2)	11691	RPP30	308	Blasticidin	679	2.20455
	C04	18-6 (Replicate 1)	15623	RPP30	334	Blasticidin	213	0.637725	0.622012	1.07678
	D04	18-6 (Replicate 2)	9890	RPP30	254	Blasticidin	154	0.606299
	E04	18-7 (Replicate 1)	16016	RPP30	356	Blasticidin	241	0.676966	0.652533	1.12961
	F04	18-7 (Replicate 2)	15075	RPP30	363	Blasticidin	228	0.628099
	G04	18-8 (Replicate 1)	17177	RPP30	420	Blasticidin	665	1.58333	1.5645	2.70834
	H04	18-8 (Replicate 2)	16188	RPP30	416	Blasticidin	643	1.54567
	A05	18-9 (Replicate 1)	12966	RPP30	293	Blasticidin	166	0.566553	0.54852	0.949555
	B05	18-9 (Replicate 2)	13968	RPP30	328	Blasticidin	174	0.530488
	C05	19-1 (Replicate 1)	14108	RPP30	340	Blasticidin	495	1.45588	1.46921	2.54338
	D05	19-1 (Replicate 2)	11934	RPP30	315	Blasticidin	467	1.48254
	E05	19-2 (Replicate 1)	16078	RPP30	372	Blasticidin	578	1.55376	1.64178	2.84213
	F05	19-2 (Replicate 2)	14171	RPP30	359	Blasticidin	621	1.72981
	G05	19-3 (Replicate 1)	14595	RPP30	312	Blasticidin	278	0.891026	0.88117	1.52541
	H05	19-3 (Replicate 2)	15384	RPP30	373	Blasticidin	325	0.871314
	G03	19-4 (Replicate 1)	16595	RPP30	389	Blasticidin	923	2.37275	2.31729	4.01152
	H03	19-4 (Replicate 2)	15367	RPP30	359	Blasticidin	812	2.26184
	A06	19-5 (Replicate 1)	13657	RPP30	345	Blasticidin	208	0.602899	0.65093	1.12684
	B06	19-5 (Replicate 2)	13330	RPP30	289	Blasticidin	202	0.698962
	C06	19-6 (Replicate 1)	10285	RPP30	221	Blasticidin	239	1.08145	1.03321	1.7886
	D06	19-6 (Replicate 2)	11446	RPP30	266	Blasticidin	262	0.984962
	E06	19-7 (Replicate 1)	15307	RPP30	325	Blasticidin	295	0.907692	0.892222	1.54454
	F06	19-7 (Replicate 2)	16217	RPP30	357	Blasticidin	313	0.876751
	G06	19-8 (Replicate 1)	14639	RPP30	346	Blasticidin	424	1.22543	1.1388	1.97141
	H06	19-8 (Replicate 2)	15084	RPP30	345	Blasticidin	363	1.05217
	A07	19-9 (Replicate 1)	14138	RPP30	301	Blasticidin	232	0.770764	0.747451	1.29393
	B07	19-9 (Replicate 2)	18494	RPP30	435	Blasticidin	315	0.724138
	C07	19-10 (Replicate 1)	14740	RPP30	338	Blasticidin	410	1.21302	1.18352	2.04881
	D07	19-10 (Replicate 2)	18407	RPP30	461	Blasticidin	532	1.15401
	Well	H9 Sample	AcceptedDroplets	Target (Reference)	Positives	Target (GOI)	Positives	Fold difference (Target/Reference Positives)	Average	Normalised to Sample WT
	A02	NTC (Replicate 1)	16532	RPP30	0	Blasticidin	0	0	0	NA			= untargeted H9 cells
	B02	NTC (Replicate 2)	16042	RPP30	0	Blasticidin	8	0		NA
	G02	919-1 (Replicate 1)	17765	RPP30	444	Blasticidin	1096	2.46847	2.41165	4.82331			= GSH candidate clones with copy number ≈1
	H02	919-1 (Replicate 2)	16181	RPP30	558	Blasticidin	1314	2.35484
	A03	919-2 (Replicate 1)	16902	RPP30	713	Blasticidin	478	0.670407	0.67384	1.34768
	B03	919-2 (Replicate 2)	15351	RPP30	660	Blasticidin	447	0.677273
	C03	919-3 (Replicate 1)	18572	RPP30	613	Blasticidin	342	0.557912	0.530342	1.06068
	D03	919-3 (Replicate 2)	15366	RPP30	541	Blasticidin	272	0.502773
	E03	919-4 (Replicate 1)	17812	RPP30	271	Blasticidin	197	0.726937	0.711906	1.42381
	F03	919-4 (Replicate 2)	17747	RPP30	320	Blasticidin	223	0.696875
	G03	919-5 (Replicate 1)	18504	RPP30	100	Blasticidin	305	3.05	3.18571	6.37143
	H03	919-5 (Replicate 2)	16534	RPP30	84	Blasticidin	279	3.32143
	A04	919-7 (Replicate 1)	15496	RPP30	1061	Blasticidin	611	0.575872	0.568445	1.13689
	B04	919-7 (Replicate 2)	17720	RPP30	1139	Blasticidin	639	0.561018
	C04	919-8 (Replicate 1)	15345	RPP30	544	Blasticidin	1213	2.22978	2.23124	4.46248
	D04	919-8 (Replicate 2)	16228	RPP30	795	Blasticidin	1775	2.2327
	E04	919-9 (Replicate 1)	15515	RPP30	1317	Blasticidin	595	0.451784	0.457985	0.91597
	F04	919-9 (Replicate 2)	16903	RPP30	1424	Blasticidin	661	0.464185
	G04	919-10 (Replicate 1)	16191	RPP30	690	Blasticidin	333	0.482609	0.531724	1.06345
	H04	919-10 (Replicate 2)	20579	RPP30	835	Blasticidin	485	0.580838
	A05	919-11 (Replicate 1)	13616	RPP30	336	Blasticidin	226	0.672619	0.627432	1.25486
	B05	919-11 (Replicate 2)	16975	RPP30	383	Blasticidin	223	0.582245
	C05	919-12 (Replicate 1)	15786	RPP30	520	Blasticidin	332	0.638462	0.585535	1.17107
	D05	919-12 (Replicate 2)	17568	RPP30	644	Blasticidin	343	0.532609
	E05	918-1 (Replicate 1)	17657	RPP30	473	Blasticidin	285	0.602537	0.627355	1.25471
	F05	918-1 (Replicate 2)	15457	RPP30	414	Blasticidin	270	0.652174
	G05	918-4 (Replicate 1)	15540	RPP30	1063	Blasticidin	6767	6.36595	6.74693	13.4939
	H05	918-4 (Replicate 2)	15615	RPP30	774	Blasticidin	5517	7.12791
	A06	918-5 (Replicate 1)	17488	RPP30	1225	Blasticidin	477	0.389388	0.431676	0.863352
	B06	918-5 (Replicate 2)	14604	RPP30	941	Blasticidin	446	0.473964
	C06	918-6 (Replicate 1)	15620	RPP30	1627	Blasticidin	2915	1.79164	1.73718	3.47437
	D06	918-6 (Replicate 2)	17044	RPP30	1806	Blasticidin	3039	1.68272
	E06	918-7 (Replicate 1)	16726	RPP30	849	Blasticidin	334	0.393404	0.397239	0.794478
	F06	918-7 (Replicate 2)	17494	RPP30	1117	Blasticidin	448	0.401074
	G06	918-8 (Replicate 1)	14409	RPP30	695	Blasticidin	331	0.476259	0.465037	0.930074
	H06	918-8 (Replicate 2)	16512	RPP30	747	Blasticidin	339	0.453815
	A07	918-9 (Replicate 1)	15118	RPP30	462	Blasticidin	450	0.974026	1.02644	2.05287
	B07	918-9 (Replicate 2)	15324	RPP30	520	Blasticidin	561	1.07885
	C07	918-10 (Replicate 1)	17122	RPP30	831	Blasticidin	1464	1.76173	1.80676	3.61352
	D07	918-10 (Replicate 2)	14835	RPP30	533	Blasticidin	987	1.85178
	E07	918-11 (Replicate 1)	16242	RPP30	692	Blasticidin	1083	1.56503	1.50674	3.01348
	F07	918-11 (Replicate 2)	17534	RPP30	776	Blasticidin	1124	1.44845
	G07	91-1 (Replicate 1)	16495	RPP30	226	Blasticidin	141	0.623894	0.662787	1.32557
	H07	91-1 (Replicate 2)	16508	RPP30	238	Blasticidin	167	0.701681
	A08	91-2 (Replicate 1)	14998	RPP30	255	Blasticidin	182	0.713725	0.690744	1.38149
	B08	91-2 (Replicate 2)	16620	RPP30	304	Blasticidin	203	0.667763
	C08	91-3 (Replicate 1)	18120	RPP30	587	Blasticidin	378	0.643952	0.605034	1.21007
	D08	91-3 (Replicate 2)	14402	RPP30	484	Blasticidin	274	0.566116
	E08	91-4 (Replicate 1)	18042	RPP30	222	Blasticidin	173	0.779279	0.766833	1.53367
	F08	91-4 (Replicate 2)	18667	RPP30	285	Blasticidin	215	0.754386
	G08	91-5 (Replicate 1)	16796	RPP30	1044	Blasticidin	598	0.572797	0.551747	1.10349
	H08	91-5 (Replicate 2)	16792	RPP30	961	Blasticidin	510	0.530697
	A09	91-6 (Replicate 1)	15509	RPP30	654	Blasticidin	1402	2.14373	2.19447	4.38893
	B09	91-6 (Replicate 2)	14569	RPP30	469	Blasticidin	1053	2.2452
	C09	91-7 (Replicate 1)	15542	RPP30	589	Blasticidin	396	0.672326	0.663952	1.3279
	D09	91-7 (Replicate 2)	13714	RPP30	511	Blasticidin	335	0.655577
	E09	91-11 (Replicate 1)	16027	RPP30	3029	Blasticidin	4542	1.4995	1.49612	2.99225
	F09	91-11 (Replicate 2)	15981	RPP30	3101	Blasticidin	4629	1.49274
	G09	91-12 (Replicate 1)	15603	RPP30	984	Blasticidin	2393	2.43191	2.42659	4.85317
	H09	91-12 (Replicate 2)	15552	RPP30	997	Blasticidin	2414	2.42126
	C02	C1 (Replicate 1)	16242	RPP30	176	Blasticidin	0	0	0	0
	D02	C1 (Replicate 2)	17033	RPP30	195	Blasticidin	0	0
