# Supplementary material for: Computationally defined and in vitro validated putative genomic safe harbour loci for transgene expression in human cells
Source: eLife. 2024 Jan 2;13:e79592. doi: 10.7554/eLife.79592 (PMC10836832; doi:10.7554/eLife.79592)
Supplement: Supplementary file 4. — (1) qPCR data source file for Figure 2C. (2) qPCR data source file for Figure 2–figure supplement 5A. [file elife-79592-supp4.xlsx]

## Sheet: H1 qPCR data
Supplementary File 4-1: qPCR data source file for Figure 2C
log2FC against un-targeted H1							mean log2FC against un-targeted H1
Comparison	rep_no	MAGI3	TXNL1	ZNRF4			Comparison	MAGI3	TXNL1	ZNRF4
Keppel	1	0.0922437	-0.0839326	0.108406			Keppel	0.0268781	-0.00191129	-0.0209884
Keppel	2	-0.0397849	0.0493718	-0.0960497			Olonne	-0.00764502	-0.0670704	0.0375333
Keppel	3	0.0264668	0.0383248	-0.0780709			H1	0.0651624	-0.0142356	0.02145
Keppel	4	0.0197751	-0.0107263	0.0806021			Pansio	0.0530825	-0.0462083	-0.012079
Keppel	5	0.0356899	-0.00259411	-0.119829
Olonne	1	0.0740736	-0.116533	0.192583
Olonne	2	-0.0410779	0.0132437	0.00049875
Olonne	3	-0.0615456	-0.0548504	-0.0704235
Olonne	4	-0.00710222	-0.0837322	0.121647
Olonne	5	-0.00257309	-0.0934795	-0.0566384
H1	1	0.0249987	0.0029694	0.128809
H1	2	0.0672283	0.059851	0.0425263
H1	3	0.0901038	-0.00700743	-0.0150811
H1	4	0.0381678	-0.06723	0.0356683
H1	5	0.105313	-0.0597609	-0.084673
Pansio	1	0.107504	-0.140733	0.0920591
Pansio	2	0.0241597	0.0326145	-0.100617
Pansio	3	0.00797462	-0.0416809	-0.108414
Pansio	4	0.0668498	-0.0716831	0.0356124
Pansio	5	0.0589245	-0.00955949	0.0209651
P-value of one sample Student's t-Test
Comparison	MAGI3	TXNL1	ZNRF4
Keppel	0.27034	0.939112	0.683367
Olonne	0.757884	0.0400886	0.506369
H1	0.0125865	0.571855	0.575104
Pansio	0.0380146	0.189815	0.775448

## Sheet: H9 qPCR data
Supplementary File 4-2: qPCR data source file for Figure 2 - Figure Supplement 3 A
log2FC against un-targeted H9							mean log2FC against un-targeted H9
Comparison	rep_no	MAGI3	TXNL1	ZNRF4			Comparison	MAGI3	TXNL1	ZNRF4
Olonne	1	-0.0120797	-0.0645083	-0.00634835			Olonne	-0.0597909	-0.0917378	-0.0676917
Olonne	2	-0.0633373	-0.00771643	-0.0169152			Keppel	-0.0411022	-0.0937572	-0.0285075
Olonne	3	-0.243807	-0.429831	-0.0572456			H9	-0.0268457	-0.0393216	0.0353393
Olonne	4	-0.0604097	-0.00205552	-0.134809			Pansio	-0.0508493	-0.139521	0.0194917
Olonne	5	0.0806795	0.0454224	-0.123141
Keppel	1	-0.100606	-0.129381	-0.0348735
Keppel	2	-0.0405329	-0.0108906	0.0520206
Keppel	3	-0.157143	-0.393915	-0.0696398
Keppel	4	0.0352492	0.0655347	-0.0913594
Keppel	5	0.0575216	-0.000134027	0.00131443
H9	1	-0.0586072	-0.197378	0.203602
H9	2	-0.0805353	0.00685299	0.135793
H9	3	-0.191652	-0.311645	0.0108707
H9	4	0.0846473	0.283748	-0.124206
H9	5	0.111918	0.0218144	-0.0493631
Pansio	1	-0.066779	-0.153084	0.0491407
Pansio	2	-0.0250034	-0.0928121	0.114115
Pansio	3	-0.20242	-0.417963	0.0893828
Pansio	4	0.00924771	0.0836076	-0.113488
Pansio	5	0.0307082	-0.117353	-0.0416916
P-value of one sample Student's t-Test
Comparison	MAGI3	TXNL1	ZNRF4
Olonne	0.321225	0.347708	0.0629173
Keppel	0.365974	0.313321	0.327045
H9	0.656741	0.720311	0.586602
Pansio	0.285954	0.158796	0.670396
