# Supplementary material for: Computationally defined and in vitro validated putative genomic safe harbour loci for transgene expression in human cells
Source: eLife. 2024 Jan 2;13:e79592. doi: 10.7554/eLife.79592 (PMC10836832; doi:10.7554/eLife.79592)
Supplement: Supplementary file 5. — (1) Differentially expressed genes |logFC|≥1 and FDR ≤0.01. (2) Functional enrichment analysis results from g:GOSt. [file elife-79592-supp5.xlsx]

## Sheet: Key
	Supplementary File 5-1: Differentially expressed genes |logFC|≥1 and FDR≤0.01
	Supplementary File 5-2: Functional enrichment analysis results from g:GOSt			= term including to CASP9 (ENSG00000132906)

## Sheet: Pansio-1 (113339961-113340514)
ensembl_gene_id_version	Pansio_DEseq_LFC	Pansio_DEseq_P	Pansio_DEseq_FDR	external_gene_name	chromosome_name	start_position	end_position	shared_with_WT_H1	shared_with_olonne	shared_with_keppel	shared_with_H9pansio
ENSG00000132906.18	3.14391	5.00163e-50	1.32818e-45	CASP9	1	15490832	15526534	FALSE	TRUE	TRUE	TRUE
ENSG00000215146.6	-1.91831	3.55133e-30	4.71528e-26		10	42254072	42367993	FALSE	TRUE	FALSE	FALSE
ENSG00000198300.14	-10.6351	7.80305e-30	6.907e-26	PEG3	19	56810077	56840728	FALSE	TRUE	FALSE	FALSE
ENSG00000129317.15	-1.36783	4.42192e-23	2.9356e-19	PUS7L	12	43718992	43758793	FALSE	TRUE	FALSE	FALSE
ENSG00000263563.7	-2.07621	4.53916e-22	2.41075e-18	UBBP4	17	22090743	22205156	FALSE	TRUE	FALSE	FALSE
ENSG00000132718.9	-1.92953	1.62049e-16	7.17202e-13	SYT11	1	155859567	155885199	FALSE	FALSE	FALSE	FALSE
ENSG00000258993.1	17.5422	2.59567e-15	9.84687e-12		14	53023055	53023597	TRUE	TRUE	TRUE	FALSE
ENSG00000196604.13	2.7151	1.96771e-14	6.53158e-11	POTEF	2	130073535	130129222	FALSE	TRUE	FALSE	FALSE
ENSG00000232135.1	-21.2461	4.9025e-14	1.44651e-10		20	45536796	45537014	FALSE	FALSE	FALSE	FALSE
ENSG00000275386.1	19.6041	3.49643e-13	9.28477e-10		8	93974671	93974776	FALSE	TRUE	TRUE	FALSE
ENSG00000228807.1	-22.9332	6.4946e-13	1.56786e-09	MRPS18CP6	22	44483495	44483717	FALSE	FALSE	FALSE	FALSE
ENSG00000224219.1	-8.06228	1.29648e-12	2.869e-09	SEC61GP1	2	193730555	193730689	FALSE	FALSE	FALSE	FALSE
ENSG00000284655.1	18.354	1.76898e-12	3.61348e-09		8	7680309	7680526	TRUE	TRUE	TRUE	FALSE
ENSG00000287080.2	-2.91298	2.59317e-12	4.91869e-09	H3C3	6	26045384	26045869	FALSE	TRUE	TRUE	FALSE
ENSG00000188219.16	2.70046	4.79939e-12	8.49652e-09	POTEE	2	131209536	131265278	FALSE	FALSE	FALSE	TRUE
ENSG00000262986.1	-20.7387	8.7474e-12	1.4518e-08	SMIM10L1	CHR_HSCHR12_2_CTG2	11203312	11203513	FALSE	FALSE	FALSE	FALSE
ENSG00000235729.1	-6.83789	1.37311e-11	2.14487e-08		X	143806391	143806733	FALSE	TRUE	TRUE	FALSE
ENSG00000242768.2	-21.0254	8.46449e-11	1.24875e-07		4	21656511	21656869	FALSE	FALSE	FALSE	FALSE
ENSG00000198001.16	-1.19771	1.95067e-10	2.72632e-07	IRAK4	12	43758944	43798307	FALSE	TRUE	FALSE	FALSE
ENSG00000232843.2	2.791	2.54649e-10	3.3811e-07	SNX18P2	9	92893698	92894505	FALSE	FALSE	FALSE	FALSE
ENSG00000251668.2	-22.9098	3.70433e-10	4.68422e-07		5	76170930	76171106	FALSE	FALSE	FALSE	FALSE
ENSG00000237349.1	19.503	1.21632e-09	1.46815e-06		1	108986963	108987245	TRUE	TRUE	TRUE	FALSE
ENSG00000180178.11	1.89205	1.59527e-09	1.77229e-06	FAR2P1	2	130012065	130040560	FALSE	FALSE	FALSE	FALSE
ENSG00000263107.1	20.0556	1.60177e-09	1.77229e-06		17	19582116	19582275	TRUE	TRUE	TRUE	FALSE
ENSG00000226324.1	-21.4394	2.66942e-09	2.53166e-06		1	71367054	71367303	FALSE	FALSE	TRUE	FALSE
ENSG00000255253.1	17.2319	2.4979e-09	2.53166e-06		8	12638428	12638602	TRUE	FALSE	TRUE	FALSE
ENSG00000277702.1	-22.3793	2.62652e-09	2.53166e-06		1	143419625	143420207	TRUE	FALSE	FALSE	FALSE
ENSG00000284865.1	17.2319	2.4979e-09	2.53166e-06		CHR_HG76_PATCH	12438569	12438743	TRUE	FALSE	TRUE	FALSE
ENSG00000228829.1	19.8935	3.18675e-09	2.91808e-06		7	76173733	76177205	TRUE	TRUE	TRUE	FALSE
ENSG00000213115.2	-5.77727	3.30133e-09	2.92223e-06		2	188227189	188228382	FALSE	TRUE	TRUE	TRUE
ENSG00000263396.1	18.5931	5.19404e-09	4.44929e-06		18	1357651	1357942	TRUE	TRUE	FALSE	FALSE
ENSG00000198865.10	-1.18315	1.56549e-08	1.29911e-05	CCDC152	5	42756818	42802439	FALSE	TRUE	FALSE	TRUE
ENSG00000261554.1	-6.74617	1.74388e-08	1.4033e-05		15	20893383	20893980	FALSE	TRUE	FALSE	FALSE
ENSG00000233908.1	17.8629	2.60735e-08	2.03642e-05		6	109288440	109288562	TRUE	TRUE	TRUE	FALSE
ENSG00000257896.1	-2.36747	3.00223e-08	2.27783e-05		12	43736628	43741067	FALSE	TRUE	FALSE	FALSE
ENSG00000258802.1	19.0116	3.25604e-08	2.40179e-05		14	52798904	52799061	TRUE	TRUE	TRUE	FALSE
ENSG00000258764.1	19.7496	4.12893e-08	2.96334e-05		14	60544400	60544654	TRUE	TRUE	TRUE	FALSE
ENSG00000120675.6	-1.5647	4.84841e-08	3.38814e-05	DNAJC15	13	43023203	43114213	FALSE	TRUE	FALSE	FALSE
ENSG00000198889.5	-2.25306	5.55463e-08	3.78213e-05	DCAF12L1	X	126549383	126552814	FALSE	TRUE	TRUE	FALSE
ENSG00000259593.1	17.4359	7.16314e-08	4.75543e-05	MTND5P40	15	46341354	46341599	TRUE	FALSE	TRUE	FALSE
ENSG00000168234.13	-1.00821	1.68504e-07	0.000109137	TTC39C	18	23992773	24135610	FALSE	TRUE	TRUE	FALSE
ENSG00000145721.12	3.84041	3.25207e-07	0.000197932	LIX1	5	97091867	97142753	FALSE	TRUE	TRUE	FALSE
ENSG00000156253.7	-1.41289	3.25089e-07	0.000197932	RWDD2B	21	29004384	29019360	FALSE	TRUE	TRUE	FALSE
ENSG00000265790.1	-1.15399	3.27961e-07	0.000197932	RNASEH1P1	17	20901939	20902680	FALSE	FALSE	FALSE	FALSE
ENSG00000206262.9	-1.2331	3.458e-07	0.000199624	FOXL2NB	3	138947217	138953990	FALSE	TRUE	TRUE	FALSE
ENSG00000243705.1	16.2435	3.41441e-07	0.000199624		16	87268185	87268337	TRUE	FALSE	TRUE	TRUE
ENSG00000285723.1	18.9164	5.5045e-07	0.000311004	MKKS	20	10420546	10420737	TRUE	FALSE	TRUE	FALSE
ENSG00000279461.2	18.0003	6.10332e-07	0.000337654		14	74003396	74003470	TRUE	FALSE	TRUE	FALSE
ENSG00000258967.1	16.7279	6.30063e-07	0.000341455	HMGN1P3	14	68887785	68888084	FALSE	FALSE	FALSE	FALSE
ENSG00000138083.5	4.7762	6.4921e-07	0.000344795	SIX3	2	44941702	44946071	FALSE	TRUE	TRUE	FALSE
ENSG00000196834.14	1.90936	7.61247e-07	0.000396371	POTEI	2	130459455	130509707	FALSE	FALSE	FALSE	FALSE
ENSG00000138795.10	2.59624	9.51938e-07	0.000486129	LEF1	4	108047545	108168956	FALSE	TRUE	TRUE	FALSE
ENSG00000229886.1	-6.51879	1.02014e-06	0.000511129		7	66025126	66031544	FALSE	TRUE	TRUE	FALSE
ENSG00000271667.1	-21.4826	1.10852e-06	0.000545126		2	116687218	116687387	FALSE	FALSE	FALSE	FALSE
ENSG00000251099.2	19.0305	1.24277e-06	0.000600033		5	111572236	111572398	TRUE	TRUE	TRUE	FALSE
ENSG00000242156.1	19.5811	1.28821e-06	0.000610865		22	29419155	29423193	TRUE	TRUE	TRUE	FALSE
ENSG00000118785.15	-1.42717	1.54516e-06	0.000719853	SPP1	4	87975667	87983532	TRUE	TRUE	TRUE	FALSE
ENSG00000231458.2	-1.68621	1.88651e-06	0.000863731	RNASEH1P2	17	16683438	16684227	FALSE	FALSE	FALSE	FALSE
ENSG00000269699.7	-5.44172	1.95596e-06	0.00088035	ZIM2	19	56774547	56840731	FALSE	FALSE	FALSE	FALSE
ENSG00000276184.4	-1.24206	2.04099e-06	0.000903307	UPK3B	CHR_HSCHR7_2_CTG4_4	76510496	76515744	TRUE	TRUE	TRUE	FALSE
ENSG00000081842.18	-1.02321	2.08349e-06	0.000907002	PCDHA6	5	140827958	141012347	FALSE	FALSE	FALSE	FALSE
ENSG00000169554.23	2.4918	2.29876e-06	0.000984573	ZEB2	2	144364364	144521057	TRUE	TRUE	TRUE	FALSE
ENSG00000248313.1	2.82014	2.55125e-06	0.00107537	CYP4F27P	2	130048426	130049440	FALSE	TRUE	FALSE	FALSE
ENSG00000162761.14	7.3691	3.69777e-06	0.00151068	LMX1A	1	165201867	165356715	FALSE	TRUE	TRUE	FALSE
ENSG00000255624.5	-1.33479	5.02962e-06	0.00202366	C10orf88B	10	122879681	122898716	FALSE	TRUE	TRUE	FALSE
ENSG00000270393.1	1.89869	5.2605e-06	0.00208496		22	19018043	19018916	TRUE	FALSE	TRUE	FALSE
ENSG00000274843.3	7.30524	6.18194e-06	0.00241414	MUC20	CHR_HSCHR3_3_CTG3	195719081	195738792	FALSE	TRUE	FALSE	FALSE
ENSG00000166450.13	2.84729	6.9639e-06	0.00268009	PRTG	15	55611544	55743152	FALSE	TRUE	TRUE	FALSE
ENSG00000202356.1	17.5738	7.49433e-06	0.00284303	RNA5SP277	8	119891132	119891229	TRUE	TRUE	TRUE	FALSE
ENSG00000116106.12	2.30752	8.72245e-06	0.00326232	EPHA4	2	221418027	221574202	TRUE	TRUE	TRUE	FALSE
ENSG00000158315.11	1.01055	9.23103e-06	0.00340458	RHBDL2	1	38885807	38941830	FALSE	FALSE	FALSE	FALSE
ENSG00000168404.13	-1.15153	1.02107e-05	0.00371432	MLKL	16	74671855	74700960	FALSE	FALSE	FALSE	FALSE
ENSG00000169116.11	-1.19695	1.13544e-05	0.00407453	PARM1	4	74933095	75050115	TRUE	TRUE	FALSE	FALSE
ENSG00000113361.13	3.27787	1.18726e-05	0.00420367	CDH6	5	31193686	31329146	FALSE	TRUE	TRUE	FALSE
ENSG00000166407.14	4.43567	1.33217e-05	0.00453537	LMO1	11	8224309	8268716	TRUE	TRUE	TRUE	FALSE
ENSG00000226259.10	-3.80612	1.36873e-05	0.00460085	GTF2H2B	5	70415352	70448015	FALSE	FALSE	FALSE	FALSE
ENSG00000271618.1	19.1939	1.45545e-05	0.00483119		1	71738173	71738354	TRUE	TRUE	TRUE	FALSE
ENSG00000128683.14	3.89244	1.50521e-05	0.00493468	GAD1	2	170813213	170861151	FALSE	TRUE	TRUE	FALSE
ENSG00000110799.14	3.42738	1.71315e-05	0.00554788	VWF	12	5948877	6124770	FALSE	TRUE	TRUE	FALSE
ENSG00000204619.8	-4.26469	1.76418e-05	0.00563187	PPP1R11	6	30066709	30070333	TRUE	TRUE	TRUE	FALSE
ENSG00000226267.1	18.8623	1.7815e-05	0.00563187	HCG9P5	CHR_HSCHR6_MHC_SSTO_CTG1	29745983	29746207	FALSE	FALSE	TRUE	FALSE
ENSG00000166183.16	-3.54658	2.01565e-05	0.00629714	ASPG	14	104085686	104115582	FALSE	FALSE	FALSE	FALSE
ENSG00000141449.16	3.3017	2.11642e-05	0.00645994	GREB1L	18	21242232	21526112	TRUE	TRUE	TRUE	FALSE
ENSG00000236073.2	-6.72048	2.09332e-05	0.00645994		1	21073639	21073753	FALSE	FALSE	FALSE	FALSE
ENSG00000184731.6	-1.31693	2.18855e-05	0.00660419	FAM110C	2	38814	46870	FALSE	FALSE	FALSE	FALSE
ENSG00000275953.1	2.6615	2.32681e-05	0.00694251	YAP1P3	6	126627484	126628570	FALSE	TRUE	TRUE	FALSE
ENSG00000204335.4	5.07172	2.50779e-05	0.00731808	SP5	2	170715337	170718078	FALSE	TRUE	TRUE	FALSE
ENSG00000265019.1	-22.6917	2.8269e-05	0.00807187	NCOR1P2	17	22061961	22070538	FALSE	TRUE	FALSE	FALSE
ENSG00000175868.14	-1.0381	2.96552e-05	0.00837761	CALCB	11	14904997	15082342	FALSE	TRUE	FALSE	FALSE
ENSG00000231480.1	-21.6836	3.35399e-05	0.00919958	SNRPGP13	21	38502445	38502621	FALSE	FALSE	FALSE	FALSE
ENSG00000235712.10	-2.62448	3.39506e-05	0.00919958	RXRB	CHR_HSCHR6_MHC_MCF_CTG1	33363951	33371048	FALSE	FALSE	FALSE	FALSE
ENSG00000261593.1	-20.9081	3.37052e-05	0.00919958	CYP4A27P	1	47000898	47001087	FALSE	FALSE	FALSE	FALSE
ENSG00000276410.4	-1.85091	3.36909e-05	0.00919958	H2BC3	6	26043227	26043713	FALSE	TRUE	TRUE	FALSE
ENSG00000256293.2	-4.97045	3.56223e-05	0.00950877	ATP6V1E1P3	12	64338178	64338797	FALSE	FALSE	TRUE	FALSE
ENSG00000284636.1	19.6719	3.58078e-05	0.00950877		4	9000841	9001058	TRUE	TRUE	FALSE	TRUE
ENSG00000254794.1	19.3102	3.7116e-05	0.0096629		11	87917948	87917999	TRUE	FALSE	FALSE	FALSE

## Sheet: Olônne-18 (56534775-56536439)
ensembl_gene_id_version	Olonne_DEseq_LFC	Olonne_DEseq_P	Olonne_DEseq_FDR	external_gene_name	chromosome_name	start_position	end_position	shared_with_WT_H1	shared_with_keppel	shared_with_pansio	shared_with_H9olonne
ENSG00000132906.18	2.76616	4.21753e-39	1.06467e-34	CASP9	1	15490832	15526534	FALSE	TRUE	TRUE	TRUE
ENSG00000198865.10	-2.72328	8.68376e-32	1.09606e-27	CCDC152	5	42756818	42802439	FALSE	FALSE	TRUE	TRUE
ENSG00000197181.12	-1.97967	1.95988e-27	1.64917e-23	PIWIL2	8	22275316	22357568	FALSE	TRUE	FALSE	FALSE
ENSG00000215146.6	-1.79512	1.03532e-26	6.53391e-23		10	42254072	42367993	FALSE	FALSE	TRUE	FALSE
ENSG00000129317.15	-1.46309	1.06714e-25	5.3878e-22	PUS7L	12	43718992	43758793	FALSE	FALSE	TRUE	FALSE
ENSG00000162892.16	-21.2325	9.9566e-22	4.18907e-18	IL24	1	206897443	206904139	FALSE	FALSE	FALSE	FALSE
ENSG00000180938.6	-5.93455	9.01768e-21	3.25203e-17	ZNF572	8	124973295	124979389	FALSE	TRUE	FALSE	FALSE
ENSG00000257896.1	-9.07753	8.79398e-20	2.77494e-16		12	43736628	43741067	FALSE	FALSE	TRUE	FALSE
ENSG00000120675.6	-2.98032	2.83379e-19	7.94846e-16	DNAJC15	13	43023203	43114213	FALSE	FALSE	TRUE	FALSE
ENSG00000156253.7	-2.60142	4.35859e-18	1.10028e-14	RWDD2B	21	29004384	29019360	FALSE	TRUE	TRUE	TRUE
ENSG00000227852.1	-20.9439	6.98982e-17	1.6041e-13	RPS29P17	9	35592786	35592951	FALSE	FALSE	FALSE	FALSE
ENSG00000258993.1	18.3644	1.09427e-16	2.30198e-13		14	53023055	53023597	TRUE	TRUE	TRUE	FALSE
ENSG00000240253.6	-1.77052	1.57192e-16	3.05243e-13	FAR2P3	2	130690133	130718831	FALSE	FALSE	FALSE	FALSE
ENSG00000198001.16	-1.53554	2.19963e-15	3.96624e-12	IRAK4	12	43758944	43798307	FALSE	FALSE	TRUE	FALSE
ENSG00000284655.1	19.106	2.05082e-13	3.45139e-10		8	7680309	7680526	TRUE	TRUE	TRUE	FALSE
ENSG00000198889.5	-7.06033	2.30088e-13	3.63022e-10	DCAF12L1	X	126549383	126552814	FALSE	TRUE	TRUE	FALSE
ENSG00000275386.1	18.8491	2.76087e-12	4.09973e-09		8	93974671	93974776	FALSE	TRUE	TRUE	FALSE
ENSG00000205362.11	-21.4622	4.19142e-12	5.87823e-09	MT1A	16	56638666	56640087	TRUE	FALSE	FALSE	FALSE
ENSG00000263563.7	-1.4424	6.82859e-12	9.07268e-09	UBBP4	17	22090743	22205156	FALSE	FALSE	TRUE	FALSE
ENSG00000271378.1	-19.7441	8.18539e-12	1.03316e-08	RBISP2	5	37130430	37130700	FALSE	FALSE	FALSE	FALSE
ENSG00000287080.2	-2.81327	1.38611e-11	1.66624e-08	H3C3	6	26045384	26045869	FALSE	TRUE	TRUE	FALSE
ENSG00000235729.1	-6.76667	2.22721e-11	2.55563e-08		X	143806391	143806733	FALSE	TRUE	TRUE	FALSE
ENSG00000198300.14	1.40878	7.08544e-11	7.75463e-08	PEG3	19	56810077	56840728	FALSE	FALSE	TRUE	FALSE
ENSG00000257800.1	-1.69637	7.37249e-11	7.75463e-08	FNBP1P1	2	74120680	74123218	FALSE	FALSE	FALSE	TRUE
ENSG00000180543.5	-5.31407	9.55823e-11	9.65152e-08	TSPYL5	8	97273488	97277928	FALSE	TRUE	FALSE	TRUE
ENSG00000204065.3	-4.10688	3.48095e-10	3.37973e-07	TCEAL5	X	103273691	103276750	FALSE	TRUE	FALSE	FALSE
ENSG00000255624.5	-1.86449	8.3292e-10	7.7875e-07	C10orf88B	10	122879681	122898716	FALSE	TRUE	TRUE	FALSE
ENSG00000213115.2	-4.42101	1.64106e-09	1.47953e-06		2	188227189	188228382	FALSE	TRUE	TRUE	TRUE
ENSG00000263107.1	19.7441	2.8593e-09	2.48897e-06		17	19582116	19582275	TRUE	TRUE	TRUE	FALSE
ENSG00000267415.1	-23.9195	3.35816e-09	2.82578e-06		19	6176256	6176442	FALSE	TRUE	FALSE	FALSE
ENSG00000258764.1	21.0567	4.9307e-09	4.01518e-06		14	60544400	60544654	TRUE	TRUE	TRUE	FALSE
ENSG00000237349.1	18.5949	6.95584e-09	5.48729e-06		1	108986963	108987245	TRUE	TRUE	TRUE	FALSE
ENSG00000263396.1	18.3596	8.11915e-09	6.2109e-06		18	1357651	1357942	TRUE	FALSE	TRUE	FALSE
ENSG00000275691.2	-23.2574	8.47933e-09	6.29566e-06	MT1IP	16	56676132	56677763	FALSE	FALSE	FALSE	FALSE
ENSG00000133710.17	-1.793	9.87465e-09	7.0816e-06	SPINK5	5	148025683	148137382	FALSE	TRUE	FALSE	FALSE
ENSG00000261554.1	-6.67494	2.45886e-08	1.67761e-05		15	20893383	20893980	FALSE	FALSE	TRUE	FALSE
ENSG00000168234.13	-1.04201	6.51655e-08	4.32905e-05	TTC39C	18	23992773	24135610	FALSE	TRUE	TRUE	FALSE
ENSG00000288136.1	-7.31704	8.16561e-08	5.28545e-05		CHR_HSCHR7_3_CTG4_4	144285553	144286986	FALSE	FALSE	FALSE	FALSE
ENSG00000256917.1	-21.9767	9.71467e-08	6.13093e-05		12	68487687	68487863	FALSE	FALSE	FALSE	TRUE
ENSG00000228829.1	17.617	1.64131e-07	0.000101056		7	76173733	76177205	TRUE	TRUE	TRUE	FALSE
ENSG00000276184.4	-1.37324	1.76162e-07	0.000105882	UPK3B	CHR_HSCHR7_2_CTG4_4	76510496	76515744	TRUE	TRUE	TRUE	FALSE
ENSG00000258802.1	17.9026	1.98835e-07	0.00011673		14	52798904	52799061	TRUE	TRUE	TRUE	FALSE
ENSG00000233908.1	16.7034	2.07137e-07	0.00011884		6	109288440	109288562	TRUE	TRUE	TRUE	FALSE
ENSG00000233018.1	-21.5967	2.80349e-07	0.000153851		1	235097187	235097412	FALSE	FALSE	FALSE	FALSE
ENSG00000248313.1	-5.55606	3.3432e-07	0.000177	CYP4F27P	2	130048426	130049440	FALSE	FALSE	TRUE	FALSE
ENSG00000259160.1	-23.0452	3.36556e-07	0.000177		14	64535702	64535879	FALSE	FALSE	FALSE	TRUE
ENSG00000145721.12	3.83232	3.44824e-07	0.000177648	LIX1	5	97091867	97142753	FALSE	TRUE	TRUE	FALSE
ENSG00000138083.5	4.75607	7.23613e-07	0.000365338	SIX3	2	44941702	44946071	FALSE	TRUE	TRUE	FALSE
ENSG00000251099.2	19.3368	8.34538e-07	0.00041308		5	111572236	111572398	TRUE	TRUE	TRUE	FALSE
ENSG00000113100.10	1.09503	8.57862e-07	0.000416459	CDH9	5	26880597	27121150	TRUE	FALSE	FALSE	FALSE
ENSG00000165118.15	-1.02513	8.97677e-07	0.000427565	C9orf64	9	83938311	83956986	FALSE	FALSE	FALSE	FALSE
ENSG00000227700.1	-1.46109	1.05093e-06	0.000477144		1	148246169	148246685	FALSE	FALSE	FALSE	FALSE
ENSG00000271118.1	-21.7977	1.05847e-06	0.000477144		8	23805933	23806154	FALSE	FALSE	FALSE	FALSE
ENSG00000236978.1	7.78384	1.16605e-06	0.000516417		7	70837738	70838013	FALSE	FALSE	FALSE	FALSE
ENSG00000229886.1	-6.44756	1.33609e-06	0.000581522		7	66025126	66031544	FALSE	TRUE	TRUE	FALSE
ENSG00000200275.1	-21.0215	1.47177e-06	0.000619222	RNA5SP199	5	155845437	155845528	FALSE	FALSE	FALSE	FALSE
ENSG00000271159.1	1.98039	1.70318e-06	0.000693468	HINT1P2	7	95018163	95018397	TRUE	FALSE	FALSE	FALSE
ENSG00000228898.1	6.50833	1.7908e-06	0.000717569	MTCO1P43	2	117026537	117027024	FALSE	FALSE	FALSE	FALSE
ENSG00000202356.1	18.4901	2.40979e-06	0.000950512	RNA5SP277	8	119891132	119891229	TRUE	TRUE	TRUE	FALSE
ENSG00000169116.11	-1.29533	2.45022e-06	0.000951589	PARM1	4	74933095	75050115	TRUE	FALSE	TRUE	FALSE
ENSG00000276410.4	-2.09339	2.78376e-06	0.00106475	H2BC3	6	26043227	26043713	FALSE	TRUE	TRUE	FALSE
ENSG00000175077.6	-2.66297	3.12845e-06	0.00116158	RTP1	3	187197486	187201462	FALSE	TRUE	FALSE	FALSE
ENSG00000231122.5	19.1092	3.17497e-06	0.00116158	FAM25E	10	45815428	45817324	FALSE	TRUE	FALSE	FALSE
ENSG00000255836.1	-2.20954	3.13637e-06	0.00116158		12	7438780	7439990	FALSE	TRUE	FALSE	FALSE
ENSG00000257979.1	1.62057	3.85843e-06	0.00137186	SNRPGP18	12	116169045	116169258	TRUE	FALSE	FALSE	FALSE
ENSG00000285408.1	-1.13288	5.02201e-06	0.00173665		CHR_HSCHR7_3_CTG4_4	144360650	144373656	FALSE	FALSE	FALSE	FALSE
ENSG00000154620.6	-1.19502	5.20419e-06	0.00177533	TMSB4Y	Y	13703899	13706024	FALSE	FALSE	FALSE	FALSE
ENSG00000259691.2	1.13861	5.48521e-06	0.00179829	FKBP1AP2	15	73143236	73143518	TRUE	FALSE	FALSE	FALSE
ENSG00000116106.12	2.34833	6.03214e-06	0.00195225	EPHA4	2	221418027	221574202	TRUE	TRUE	TRUE	FALSE
ENSG00000242156.1	18.2929	6.15762e-06	0.00196763		22	29419155	29423193	TRUE	TRUE	TRUE	FALSE
ENSG00000113361.13	3.38095	6.25121e-06	0.00197257	CDH6	5	31193686	31329146	FALSE	TRUE	TRUE	FALSE
ENSG00000134551.13	1.14549	6.46614e-06	0.0020056	PRH2	12	10929236	10934845	TRUE	TRUE	FALSE	FALSE
ENSG00000212124.2	1.16406	6.59423e-06	0.0020056	TAS2R19	12	11021619	11022620	TRUE	FALSE	FALSE	FALSE
ENSG00000263028.1	1.16406	6.59423e-06	0.0020056	TAS2R19	CHR_HSCHR12_2_CTG2	11021619	11022620	TRUE	FALSE	FALSE	FALSE
ENSG00000272803.5	1.46652	6.81215e-06	0.00202313	PRH2	CHR_HSCHR12_2_CTG2	10929236	10932341	TRUE	FALSE	FALSE	FALSE
ENSG00000275679.4	1.46652	6.81215e-06	0.00202313	PRH2	CHR_HSCHR12_3_CTG2	10929236	10932341	TRUE	FALSE	FALSE	FALSE
ENSG00000275953.1	2.8105	7.54441e-06	0.00221455	YAP1P3	6	126627484	126628570	FALSE	TRUE	TRUE	FALSE
ENSG00000282834.1	1.95666	8.32843e-06	0.00241659		11	95203727	95204033	TRUE	FALSE	FALSE	FALSE
ENSG00000175868.14	-1.11172	8.83762e-06	0.00249096	CALCB	11	14904997	15082342	FALSE	FALSE	TRUE	FALSE
ENSG00000196604.13	-1.903	8.95066e-06	0.00249096	POTEF	2	130073535	130129222	FALSE	FALSE	TRUE	FALSE
ENSG00000204612.1	3.02485	9.52224e-06	0.00261282	FOXB2	9	77019655	77020953	FALSE	TRUE	FALSE	FALSE
ENSG00000015153.15	1.70485	1.02559e-05	0.00269688	YAF2	12	42157104	42238349	FALSE	TRUE	FALSE	FALSE
ENSG00000169554.23	2.32744	1.02077e-05	0.00269688	ZEB2	2	144364364	144521057	TRUE	TRUE	TRUE	FALSE
ENSG00000206262.9	-1.06544	1.02179e-05	0.00269688	FOXL2NB	3	138947217	138953990	FALSE	TRUE	TRUE	FALSE
ENSG00000231240.1	-4.559	9.96643e-06	0.00269688	KLF2P1	2	130036958	130038422	FALSE	FALSE	FALSE	FALSE
ENSG00000162761.14	7.0169	1.07087e-05	0.00278692	LMX1A	1	165201867	165356715	FALSE	TRUE	TRUE	FALSE
ENSG00000166450.13	2.73847	1.5407e-05	0.00370415	PRTG	15	55611544	55743152	FALSE	TRUE	TRUE	FALSE
ENSG00000176378.8	-6.59559	1.58276e-05	0.00376935	PFN1P10	1	21459756	21460082	FALSE	FALSE	FALSE	FALSE
ENSG00000284636.1	20.4964	1.65724e-05	0.00390984		4	9000841	9001058	TRUE	FALSE	TRUE	FALSE
ENSG00000226726.1	3.69908	1.7048e-05	0.0039848	TMEM256P2	2	221532668	221533008	FALSE	TRUE	FALSE	FALSE
ENSG00000107249.24	3.07061	2.42336e-05	0.00537829	GLIS3	9	3824127	4348392	FALSE	TRUE	FALSE	FALSE
ENSG00000130988.13	-1.20769	2.35526e-05	0.00537829	RGN	X	47078355	47093314	TRUE	TRUE	FALSE	FALSE
ENSG00000138795.10	2.23864	2.41154e-05	0.00537829	LEF1	4	108047545	108168956	FALSE	TRUE	TRUE	FALSE
ENSG00000166407.14	4.30417	2.38643e-05	0.00537829	LMO1	11	8224309	8268716	TRUE	TRUE	TRUE	FALSE
ENSG00000204619.8	-4.19347	2.43087e-05	0.00537829	PPP1R11	6	30066709	30070333	TRUE	TRUE	TRUE	FALSE
ENSG00000274843.3	6.82811	2.4501e-05	0.00537829	MUC20	CHR_HSCHR3_3_CTG3	195719081	195738792	FALSE	FALSE	TRUE	FALSE
ENSG00000236717.2	-20.1419	2.5344e-05	0.00551538		9	92150382	92157445	FALSE	TRUE	FALSE	FALSE
ENSG00000110799.14	3.35334	2.6035e-05	0.00556973	VWF	12	5948877	6124770	FALSE	TRUE	TRUE	FALSE
ENSG00000265019.1	-22.6021	3.0402e-05	0.00629073	NCOR1P2	17	22061961	22070538	FALSE	FALSE	TRUE	FALSE
ENSG00000128683.14	3.74067	3.19918e-05	0.00644478	GAD1	2	170813213	170861151	FALSE	TRUE	TRUE	FALSE
ENSG00000240404.2	8.22361	3.21677e-05	0.00644478		3	81612790	81613075	TRUE	FALSE	FALSE	FALSE
ENSG00000265099.1	1.42951	3.16506e-05	0.00644478		17	20938023	20938344	TRUE	TRUE	FALSE	FALSE
ENSG00000118785.15	-1.22373	3.6914e-05	0.0072237	SPP1	4	87975667	87983532	TRUE	TRUE	TRUE	FALSE
ENSG00000271618.1	18.2049	3.94923e-05	0.0075526		1	71738173	71738354	TRUE	TRUE	TRUE	TRUE
ENSG00000278211.4	-5.25285	4.12351e-05	0.00782661	TRIM69	CHR_HSCHR15_3_CTG8	44729020	44767863	FALSE	TRUE	FALSE	FALSE
ENSG00000069482.7	-1.46648	4.57376e-05	0.00861643	GAL	11	68683779	68691175	TRUE	FALSE	FALSE	FALSE
ENSG00000251682.1	1.39409	4.66982e-05	0.008668		5	61347126	61347716	TRUE	TRUE	FALSE	FALSE
ENSG00000204335.4	4.88784	4.89508e-05	0.00878916	SP5	2	170715337	170718078	FALSE	TRUE	TRUE	FALSE
ENSG00000234031.1	1.40862	5.45513e-05	0.00949719	RPS3AP44	13	26576886	26577675	TRUE	TRUE	FALSE	FALSE
ENSG00000141449.16	3.1238	5.74681e-05	0.00980219	GREB1L	18	21242232	21526112	TRUE	TRUE	TRUE	FALSE
ENSG00000239438.1	7.76471	5.81895e-05	0.00985862	RPS26P48	14	78231281	78231619	TRUE	FALSE	FALSE	FALSE

## Sheet: Keppel-19 (5400761-5402139)
ensembl_gene_id_version	Keppel_DEseq_LFC	Keppel_DEseq_P	Keppel_DEseq_FDR	external_gene_name	chromosome_name	start_position	end_position	shared_with_WT_H1	shared_with_pansio	shared_with_olonne	shared_with_H9keppel
ENSG00000132906.18	2.5503	1.75128e-33	4.42092e-29	CASP9	1	15490832	15526534	FALSE	TRUE	TRUE	TRUE
ENSG00000197181.12	-2.00671	3.38212e-28	2.84594e-24	PIWIL2	8	22275316	22357568	FALSE	FALSE	TRUE	FALSE
ENSG00000214298.3	-23.6772	2.67081e-28	2.84594e-24	MRPS21P6	10	125166677	125166937	FALSE	FALSE	FALSE	FALSE
ENSG00000156253.7	-2.71042	2.89991e-19	1.83014e-15	RWDD2B	21	29004384	29019360	FALSE	TRUE	TRUE	FALSE
ENSG00000255624.5	-2.9186	3.12014e-18	1.5753e-14	C10orf88B	10	122879681	122898716	FALSE	TRUE	TRUE	FALSE
ENSG00000197928.11	-1.05828	4.15852e-18	1.74963e-14	ZNF677	19	53235381	53254898	FALSE	FALSE	FALSE	FALSE
ENSG00000242715.8	-1.27849	1.45814e-17	5.25847e-14	CCDC169	13	36222008	36297840	FALSE	FALSE	FALSE	FALSE
ENSG00000258993.1	17.7145	1.35438e-15	4.27374e-12		14	53023055	53023597	TRUE	TRUE	TRUE	FALSE
ENSG00000251643.1	4.99676	6.56975e-15	1.84274e-11		4	187441677	187444298	FALSE	FALSE	FALSE	FALSE
ENSG00000284655.1	19.8069	2.57117e-14	6.49065e-11		8	7680309	7680526	TRUE	TRUE	TRUE	FALSE
ENSG00000232535.2	-3.70929	5.94402e-13	1.3641e-09	OR5H8	3	98306752	98312843	FALSE	FALSE	FALSE	FALSE
ENSG00000146833.16	1.08079	8.6137e-13	1.81203e-09	TRIM4	7	99876958	99919531	FALSE	FALSE	FALSE	FALSE
ENSG00000287080.2	-2.94287	1.56852e-12	3.04582e-09	H3C3	6	26045384	26045869	FALSE	TRUE	TRUE	FALSE
ENSG00000113209.9	-1.50482	6.98669e-12	1.2598e-08	PCDHB5	5	141135206	141138615	FALSE	FALSE	FALSE	TRUE
ENSG00000198889.5	-6.52249	1.27316e-11	2.14264e-08	DCAF12L1	X	126549383	126552814	FALSE	TRUE	TRUE	FALSE
ENSG00000235729.1	-6.80591	1.70722e-11	2.69357e-08		X	143806391	143806733	FALSE	TRUE	TRUE	TRUE
ENSG00000255253.1	18.9512	4.94968e-11	6.94165e-08		8	12638428	12638602	TRUE	TRUE	FALSE	FALSE
ENSG00000284865.1	18.9512	4.94968e-11	6.94165e-08		CHR_HG76_PATCH	12438569	12438743	TRUE	TRUE	FALSE	FALSE
ENSG00000275386.1	17.621	6.93135e-11	9.20921e-08		8	93974671	93974776	FALSE	TRUE	TRUE	FALSE
ENSG00000213115.2	-4.1861	7.37457e-10	9.30818e-07		2	188227189	188228382	FALSE	TRUE	TRUE	TRUE
ENSG00000228471.1	-7.63695	1.17392e-09	1.41117e-06		2	130082092	130082220	FALSE	FALSE	FALSE	FALSE
ENSG00000180938.6	-1.64284	1.47333e-09	1.69058e-06	ZNF572	8	124973295	124979389	FALSE	FALSE	TRUE	FALSE
ENSG00000226324.1	-21.4126	2.79384e-09	2.93866e-06		1	71367054	71367303	FALSE	TRUE	FALSE	FALSE
ENSG00000133710.17	-1.8558	3.03203e-09	3.03283e-06	SPINK5	5	148025683	148137382	FALSE	FALSE	TRUE	FALSE
ENSG00000267415.1	-23.9677	3.12366e-09	3.03283e-06		19	6176256	6176442	FALSE	FALSE	TRUE	FALSE
ENSG00000186439.14	-2.191	5.20002e-09	4.68819e-06	TRDN	6	123216339	123637093	FALSE	FALSE	FALSE	FALSE
ENSG00000237349.1	18.7613	5.07836e-09	4.68819e-06		1	108986963	108987245	TRUE	TRUE	TRUE	FALSE
ENSG00000204065.3	-3.17292	6.47132e-09	5.63317e-06	TCEAL5	X	103273691	103276750	FALSE	FALSE	TRUE	FALSE
ENSG00000259593.1	18.515	1.0179e-08	7.78665e-06	MTND5P40	15	46341354	46341599	TRUE	TRUE	FALSE	FALSE
ENSG00000145721.12	4.25436	1.51101e-08	1.0732e-05	LIX1	5	97091867	97142753	FALSE	TRUE	TRUE	FALSE
ENSG00000258802.1	19.387	1.73068e-08	1.18079e-05		14	52798904	52799061	TRUE	TRUE	TRUE	FALSE
ENSG00000265099.1	1.93295	1.78464e-08	1.18557e-05		17	20938023	20938344	TRUE	FALSE	TRUE	FALSE
ENSG00000263107.1	18.6186	2.16694e-08	1.40262e-05		17	19582116	19582275	TRUE	TRUE	TRUE	FALSE
ENSG00000258764.1	19.9493	3.00922e-08	1.8528e-05		14	60544400	60544654	TRUE	TRUE	TRUE	FALSE
ENSG00000228829.1	18.5444	3.45425e-08	2.07617e-05		7	76173733	76177205	TRUE	TRUE	TRUE	FALSE
ENSG00000116729.14	2.64221	3.57481e-08	2.09866e-05	WLS	1	68098473	68233120	FALSE	FALSE	FALSE	FALSE
ENSG00000169554.23	2.90019	3.77796e-08	2.16752e-05	ZEB2	2	144364364	144521057	TRUE	TRUE	TRUE	FALSE
ENSG00000285723.1	20.6868	4.28297e-08	2.40265e-05	MKKS	20	10420546	10420737	TRUE	TRUE	FALSE	FALSE
ENSG00000243705.1	17.2823	5.63101e-08	3.0902e-05		16	87268185	87268337	TRUE	TRUE	FALSE	FALSE
ENSG00000230395.1	-19.9951	9.95786e-08	5.23701e-05	ANAPC1P3	2	87118534	87120980	TRUE	FALSE	FALSE	FALSE
ENSG00000165996.14	-1.00913	1.18451e-07	5.98036e-05	HACD1	10	17589032	17617374	FALSE	FALSE	FALSE	FALSE
ENSG00000168234.13	-1.02145	1.16802e-07	5.98036e-05	TTC39C	18	23992773	24135610	FALSE	TRUE	TRUE	FALSE
ENSG00000206262.9	-1.27287	1.50599e-07	7.45434e-05	FOXL2NB	3	138947217	138953990	FALSE	TRUE	TRUE	FALSE
ENSG00000276650.1	-21.7402	1.70032e-07	8.09866e-05		7	64425623	64426334	TRUE	FALSE	FALSE	FALSE
ENSG00000279461.2	18.8187	1.81328e-07	8.47677e-05		14	74003396	74003470	TRUE	TRUE	FALSE	FALSE
ENSG00000128683.14	4.658	2.2158e-07	0.000101701	GAD1	2	170813213	170861151	FALSE	TRUE	TRUE	FALSE
ENSG00000213185.7	-4.73289	3.20454e-07	0.000144456	FAM24B	10	122849078	122879641	FALSE	FALSE	FALSE	FALSE
ENSG00000233908.1	16.3389	3.89308e-07	0.000169443		6	109288440	109288562	TRUE	TRUE	TRUE	FALSE
ENSG00000225349.2	1.4279	5.27203e-07	0.000221812	ANKRD49P2	12	31534715	31535247	TRUE	FALSE	FALSE	FALSE
ENSG00000231122.5	20.4477	6.12449e-07	0.000249366	FAM25E	10	45815428	45817324	FALSE	FALSE	TRUE	FALSE
ENSG00000162761.14	7.89117	7.06879e-07	0.000283245	LMX1A	1	165201867	165356715	FALSE	TRUE	TRUE	FALSE
ENSG00000166450.13	3.13203	7.63122e-07	0.000298241	PRTG	15	55611544	55743152	FALSE	TRUE	TRUE	FALSE
ENSG00000171617.15	3.07951	8.29884e-07	0.000311555	ENC1	5	74627406	74641424	FALSE	FALSE	FALSE	FALSE
ENSG00000204612.1	3.35067	9.12424e-07	0.000324412	FOXB2	9	77019655	77020953	FALSE	FALSE	TRUE	FALSE
ENSG00000275953.1	3.06217	8.99162e-07	0.000324412	YAP1P3	6	126627484	126628570	FALSE	TRUE	TRUE	FALSE
ENSG00000107796.13	1.90492	1.14808e-06	0.000387723	ACTA2	10	88935074	88991339	FALSE	FALSE	FALSE	FALSE
ENSG00000229886.1	-6.4868	1.15193e-06	0.000387723		7	66025126	66031544	FALSE	TRUE	TRUE	FALSE
ENSG00000253262.1	-20.5137	1.2552e-06	0.000416923		8	5072645	5072869	FALSE	FALSE	FALSE	FALSE
ENSG00000227795.1	-21.0729	1.32445e-06	0.000434213	MTND4LP9	3	29797652	29797825	FALSE	FALSE	FALSE	FALSE
ENSG00000175077.6	-2.78371	1.35248e-06	0.000437718	RTP1	3	187197486	187201462	FALSE	FALSE	TRUE	FALSE
ENSG00000107249.24	3.50928	1.385e-06	0.000442568	GLIS3	9	3824127	4348392	FALSE	FALSE	TRUE	FALSE
ENSG00000180787.6	-1.51518	1.53106e-06	0.000471341	ZFP3	17	5078467	5096374	FALSE	FALSE	FALSE	TRUE
ENSG00000204335.4	5.78444	1.52438e-06	0.000471341	SP5	2	170715337	170718078	FALSE	TRUE	TRUE	FALSE
ENSG00000270393.1	1.99507	1.67236e-06	0.000508639		22	19018043	19018916	TRUE	TRUE	FALSE	FALSE
ENSG00000278211.4	-6.45694	2.97649e-06	0.000883982	TRIM69	CHR_HSCHR15_3_CTG8	44729020	44767863	FALSE	FALSE	TRUE	FALSE
ENSG00000242156.1	18.7786	3.45056e-06	0.00101286		22	29419155	29423193	TRUE	TRUE	TRUE	FALSE
ENSG00000110799.14	3.66555	4.24127e-06	0.001203	VWF	12	5948877	6124770	FALSE	TRUE	TRUE	FALSE
ENSG00000206478.5	4.87541	4.38437e-06	0.00121625	IER3	CHR_HSCHR6_MHC_QBL_CTG1	30732716	30734071	FALSE	FALSE	FALSE	FALSE
ENSG00000167874.7	2.62513	4.88344e-06	0.00133997	TMEM88	17	7855066	7856099	FALSE	FALSE	FALSE	FALSE
ENSG00000007372.25	3.51903	5.09862e-06	0.00137687	PAX6	11	31784779	31817961	FALSE	FALSE	FALSE	FALSE
ENSG00000138083.5	4.37693	5.12701e-06	0.00137687	SIX3	2	44941702	44946071	FALSE	TRUE	TRUE	FALSE
ENSG00000157570.12	1.19792	5.3189e-06	0.00139865	TSPAN18	11	44726465	44932423	FALSE	FALSE	FALSE	FALSE
ENSG00000113361.13	3.39993	5.54245e-06	0.00144241	CDH6	5	31193686	31329146	FALSE	TRUE	TRUE	FALSE
ENSG00000101440.10	1.38247	5.86508e-06	0.00149042	ASIP	20	34194569	34269344	TRUE	FALSE	FALSE	FALSE
ENSG00000138795.10	2.40009	5.92243e-06	0.00149042	LEF1	4	108047545	108168956	FALSE	TRUE	TRUE	FALSE
ENSG00000251099.2	17.7831	5.96312e-06	0.00149042		5	111572236	111572398	TRUE	TRUE	TRUE	FALSE
ENSG00000116106.12	2.3426	6.35487e-06	0.0015575	EPHA4	2	221418027	221574202	TRUE	TRUE	TRUE	FALSE
ENSG00000202356.1	17.6853	6.54918e-06	0.00157455	RNA5SP277	8	119891132	119891229	TRUE	TRUE	TRUE	FALSE
ENSG00000276410.4	-2.00644	7.02256e-06	0.00167243	H2BC3	6	26043227	26043713	FALSE	TRUE	TRUE	FALSE
ENSG00000134551.13	1.13502	7.79812e-06	0.00182274	PRH2	12	10929236	10934845	TRUE	FALSE	TRUE	FALSE
ENSG00000226360.5	1.89005	9.69712e-06	0.00220535	RPL10AP6	3	61742455	61743106	FALSE	FALSE	FALSE	FALSE
ENSG00000115339.14	-1.3725	1.01275e-05	0.00227439	GALNT3	2	165747588	165794659	FALSE	FALSE	FALSE	FALSE
ENSG00000118785.15	-1.30974	1.01809e-05	0.00227439	SPP1	4	87975667	87983532	TRUE	TRUE	TRUE	FALSE
ENSG00000108231.14	3.46846	1.13746e-05	0.00249687	LGI1	10	93757840	93806272	FALSE	FALSE	FALSE	FALSE
ENSG00000166407.14	4.46366	1.17484e-05	0.0025535	LMO1	11	8224309	8268716	TRUE	TRUE	TRUE	FALSE
ENSG00000268117.1	-5.92048	1.1936e-05	0.0025535	VN1R84P	19	21719801	21720035	FALSE	FALSE	FALSE	FALSE
ENSG00000280218.1	-5.92048	1.1936e-05	0.0025535	VN1R84P	CHR_HSCHR19_2_CTG2	21729280	21729514	FALSE	FALSE	FALSE	FALSE
ENSG00000099284.15	1.03228	1.2779e-05	0.00268828	MACROH2A2	10	70052544	70112282	FALSE	FALSE	FALSE	FALSE
ENSG00000230241.1	16.8278	1.27313e-05	0.00268828		X	48135658	48136159	TRUE	FALSE	FALSE	FALSE
ENSG00000134470.21	-2.04819	1.28895e-05	0.00268912	IL15RA	10	5943639	5978187	FALSE	FALSE	FALSE	FALSE
ENSG00000201356.1	20.2201	1.33663e-05	0.00276573	RNA5SP500	X	28982852	28982970	TRUE	FALSE	FALSE	FALSE
ENSG00000138829.12	1.69583	1.40497e-05	0.00288349	FBN2	5	128257909	128659185	FALSE	FALSE	FALSE	FALSE
ENSG00000071909.19	2.13942	1.46337e-05	0.00293186	MYO3B	2	170178145	170655171	FALSE	FALSE	FALSE	FALSE
ENSG00000057657.17	2.55021	1.47716e-05	0.00293617	PRDM1	6	105993463	106109939	FALSE	FALSE	FALSE	FALSE
ENSG00000130988.13	-1.23362	1.55783e-05	0.00304852	RGN	X	47078355	47093314	TRUE	FALSE	TRUE	FALSE
ENSG00000144152.13	2.53473	1.58511e-05	0.00307805	FBLN7	2	112138385	112188218	FALSE	FALSE	FALSE	FALSE
ENSG00000147256.12	2.38407	1.61469e-05	0.00311155	ARHGAP36	X	131058346	131089885	FALSE	FALSE	FALSE	FALSE
ENSG00000251682.1	1.47517	1.63081e-05	0.00311881		5	61347126	61347716	TRUE	FALSE	TRUE	FALSE
ENSG00000015153.15	1.6625	1.69431e-05	0.00317559	YAF2	12	42157104	42238349	FALSE	FALSE	TRUE	FALSE
ENSG00000165655.17	3.67005	1.71575e-05	0.00318473	ZNF503	10	75397830	75401764	FALSE	FALSE	FALSE	FALSE
ENSG00000141449.16	3.33043	1.79294e-05	0.00330373	GREB1L	18	21242232	21526112	TRUE	TRUE	TRUE	FALSE
ENSG00000226267.1	18.7925	1.91434e-05	0.00350185	HCG9P5	CHR_HSCHR6_MHC_SSTO_CTG1	29745983	29746207	FALSE	TRUE	FALSE	FALSE
ENSG00000185862.7	1.20162	2.00107e-05	0.00363418	EVI2B	17	31303770	31314105	TRUE	FALSE	FALSE	FALSE
ENSG00000204619.8	-4.23271	2.03855e-05	0.00366219	PPP1R11	6	30066709	30070333	TRUE	TRUE	TRUE	FALSE
ENSG00000196542.9	-1.28245	2.13732e-05	0.00379961	SPTSSB	3	161344798	161372880	FALSE	FALSE	FALSE	FALSE
ENSG00000236717.2	-20.2502	2.29204e-05	0.00401808		9	92150382	92157445	FALSE	FALSE	TRUE	TRUE
ENSG00000104894.12	1.75285	2.51404e-05	0.00431731	CD37	19	49335171	49343335	TRUE	FALSE	FALSE	FALSE
ENSG00000222378.1	1.57265	2.6081e-05	0.00440988	RNA5SP44	1	39154164	39154296	TRUE	FALSE	FALSE	FALSE
ENSG00000232587.1	1.13819	2.62035e-05	0.00440988	EEF1A1P3	13	28214513	28215897	TRUE	FALSE	FALSE	FALSE
ENSG00000136688.11	6.30653	2.65073e-05	0.00443147	IL36G	2	112973203	112985658	TRUE	FALSE	FALSE	FALSE
ENSG00000168131.4	-3.46762	2.95344e-05	0.00490505	OR2B2	6	27911185	27912396	FALSE	FALSE	FALSE	FALSE
ENSG00000117600.14	-1.45998	3.2554e-05	0.00530189	PLPPR4	1	99264292	99309590	TRUE	FALSE	FALSE	FALSE
ENSG00000120149.9	3.91295	3.43726e-05	0.00554083	MSX2	5	174724582	174730896	FALSE	FALSE	FALSE	FALSE
ENSG00000233890.6	5.77561	3.44601e-05	0.00554083	TCF19	CHR_HSCHR6_MHC_DBB_CTG1	31152269	31157938	TRUE	FALSE	FALSE	FALSE
ENSG00000119242.9	1.84226	3.55723e-05	0.00568346	CCDC92	12	123918660	123972831	FALSE	FALSE	FALSE	FALSE
ENSG00000233216.1	2.1229	3.69769e-05	0.00587072		1	58228682	58229003	TRUE	FALSE	FALSE	FALSE
ENSG00000091656.19	2.27186	3.77115e-05	0.00594279	ZFHX4	8	76681239	76867281	FALSE	FALSE	FALSE	FALSE
ENSG00000140403.13	-1.01151	3.83937e-05	0.00594279	DNAJA4	15	78264086	78282196	FALSE	FALSE	FALSE	TRUE
ENSG00000180543.5	1.65862	3.81684e-05	0.00594279	TSPYL5	8	97273488	97277928	FALSE	FALSE	TRUE	TRUE
ENSG00000185551.15	4.74978	3.96211e-05	0.00606179	NR2F2	15	96325938	96340263	FALSE	FALSE	FALSE	FALSE
ENSG00000256293.2	-4.93847	3.99828e-05	0.00608028	ATP6V1E1P3	12	64338178	64338797	FALSE	TRUE	FALSE	FALSE
ENSG00000164129.12	-1.26862	4.16443e-05	0.00629502	NPY5R	4	163343892	163351934	FALSE	FALSE	FALSE	FALSE
ENSG00000204381.12	-1.20846	4.44702e-05	0.00664264	LAYN	11	111540280	111561745	FALSE	FALSE	FALSE	FALSE
ENSG00000234031.1	1.42102	4.63982e-05	0.00688651	RPS3AP44	13	26576886	26577675	TRUE	FALSE	TRUE	FALSE
ENSG00000271618.1	18.0352	4.66484e-05	0.00688651		1	71738173	71738354	TRUE	TRUE	TRUE	FALSE
ENSG00000226761.3	1.63027	4.85373e-05	0.00700474	TAS2R46	12	11061365	11062294	FALSE	FALSE	FALSE	FALSE
ENSG00000255836.1	-1.84388	4.85593e-05	0.00700474		12	7438780	7439990	FALSE	FALSE	TRUE	FALSE
ENSG00000262525.3	1.63027	4.85373e-05	0.00700474	TAS2R46	CHR_HSCHR12_2_CTG2	11061365	11062294	FALSE	FALSE	FALSE	FALSE
ENSG00000149090.13	2.44707	4.92437e-05	0.00706311	PAMR1	11	35431823	35530300	FALSE	FALSE	FALSE	FALSE
ENSG00000276184.4	-1.04569	5.98602e-05	0.00839506	UPK3B	CHR_HSCHR7_2_CTG4_4	76510496	76515744	TRUE	TRUE	TRUE	FALSE
ENSG00000110900.16	1.13882	6.22252e-05	0.00867853	TSPAN11	12	30926428	30996602	FALSE	FALSE	FALSE	FALSE
ENSG00000179546.5	-1.57671	6.30607e-05	0.00874672	HTR1D	1	23191895	23217502	FALSE	FALSE	FALSE	FALSE
ENSG00000228373.2	-2.15495	6.41781e-05	0.00885307		9	87423634	87423893	FALSE	FALSE	FALSE	FALSE
ENSG00000228078.1	-9.50512	6.56922e-05	0.00896396	HLA-U	6	29934101	29934286	FALSE	FALSE	FALSE	FALSE
ENSG00000284493.2	20.9717	6.70202e-05	0.00909601		CHR_HG926_PATCH	22321945	22327924	TRUE	FALSE	FALSE	FALSE
ENSG00000226726.1	3.42153	6.96743e-05	0.00940566	TMEM256P2	2	221532668	221533008	FALSE	FALSE	TRUE	FALSE
ENSG00000236698.1	6.85255	7.27583e-05	0.0096669	EIF1AXP1	1	16685621	16686055	TRUE	FALSE	FALSE	FALSE
ENSG00000090776.6	1.53977	7.59166e-05	0.00992973	EFNB1	X	68829021	68842160	FALSE	FALSE	FALSE	FALSE
ENSG00000225505.1	1.17194	7.56536e-05	0.00992973		1	92732000	92733257	TRUE	FALSE	FALSE	FALSE

## Sheet: WT H1
ensembl_gene_id_version	H1wt_DEseq_LFC	H1wt_DEseq_P	H1wt_DEseq_FDR	external_gene_name	chromosome_name	start_position	end_position
ENSG00000258993.1	20.0011	1.42602e-19	3.30993e-15		14	53023055	53023597
ENSG00000284655.1	20.7587	1.37757e-15	1.59874e-11		8	7680309	7680526
ENSG00000258154.2	-24.0438	1.13762e-14	8.80174e-11		14	105112690	105112863
ENSG00000198738.4	-21.0078	9.79945e-14	5.68638e-10	SMIM11P1	6	85735744	85735921
ENSG00000205362.11	-22.0489	1.079e-12	5.00895e-09	MT1A	16	56638666	56640087
ENSG00000170579.17	1.28055	9.82665e-12	3.80144e-08	DLGAP1	18	3496032	4455307
ENSG00000118785.15	-1.98379	2.84332e-11	9.42804e-08	SPP1	4	87975667	87983532
ENSG00000250813.1	18.9433	5.94333e-11	1.72438e-07	SERF1AP1	4	137301001	137301187
ENSG00000255253.1	18.2961	2.25095e-10	5.22468e-07		8	12638428	12638602
ENSG00000284865.1	18.2961	2.25095e-10	5.22468e-07		CHR_HG76_PATCH	12438569	12438743
ENSG00000113100.10	1.38648	4.05106e-10	8.54809e-07	CDH9	5	26880597	27121150
ENSG00000243705.1	19.5883	7.29755e-10	1.41153e-06		16	87268185	87268337
ENSG00000277702.1	-22.7744	1.37408e-09	2.45337e-06		1	143419625	143420207
ENSG00000258802.1	20.5897	2.11582e-09	3.50788e-06		14	52798904	52799061
ENSG00000263107.1	19.7632	2.75252e-09	4.09465e-06		17	19582116	19582275
ENSG00000237349.1	19.0667	2.82256e-09	4.09465e-06		1	108986963	108987245
ENSG00000274334.1	-22.8027	5.14904e-09	7.03025e-06	VASN	CHR_HSCHR16_3_CTG1	4373807	4385487
ENSG00000259593.1	18.2932	1.51924e-08	1.95906e-05	MTND5P40	15	46341354	46341599
ENSG00000169116.11	-1.53884	1.96135e-08	2.39605e-05	PARM1	4	74933095	75050115
ENSG00000232879.2	-23.1836	2.29477e-08	2.6632e-05	GLRX5P2	1	161034834	161035006
ENSG00000233908.1	17.8172	2.80972e-08	3.10554e-05		6	109288440	109288562
ENSG00000279461.2	19.8567	3.63192e-08	3.83184e-05		14	74003396	74003470
ENSG00000225349.2	1.54429	5.4099e-08	5.45953e-05	ANKRD49P2	12	31534715	31535247
ENSG00000230395.1	-20.3191	6.16915e-08	5.96634e-05	ANAPC1P3	2	87118534	87120980
ENSG00000288131.1	1.88855	6.49947e-08	6.03437e-05		CHR_HSCHR3_5_CTG1	75550334	75580199
ENSG00000282834.1	2.35819	7.66805e-08	6.84551e-05		11	95203727	95204033
ENSG00000276650.1	-22.1541	9.87601e-08	8.49008e-05		7	64425623	64426334
ENSG00000251099.2	20.7436	1.24281e-07	9.68715e-05		5	111572236	111572398
ENSG00000066405.13	1.51704	1.25205e-07	9.68715e-05	CLDN18	3	137998735	138033655
ENSG00000176049.16	1.14201	1.34753e-07	0.000100895	JAKMIP2	5	147585438	147782775
ENSG00000263396.1	16.7632	1.48981e-07	0.000108062		18	1357651	1357942
ENSG00000136997.21	-1.24299	1.72785e-07	0.000121531	MYC	8	127735434	127742951
ENSG00000257979.1	1.82137	2.07118e-07	0.000133539	SNRPGP18	12	116169045	116169258
ENSG00000233216.1	2.66311	2.22427e-07	0.000139534		1	58228682	58229003
ENSG00000179915.25	1.08263	2.39433e-07	0.00014625	NRXN1	2	49918503	51225575
ENSG00000176928.7	-2.50426	4.15546e-07	0.000221059	GCNT4	5	75025346	75052558
ENSG00000183722.9	-1.48167	4.17892e-07	0.000221059	LHFPL6	13	39209116	39603528
ENSG00000234702.1	1.83634	4.19052e-07	0.000221059	VDAC1P3	X	91982655	91983505
ENSG00000204113.6	1.6844	4.5422e-07	0.000234286	BMP2KL	X	74185929	74187153
ENSG00000242156.1	20.3323	4.95473e-07	0.000250009		22	29419155	29423193
ENSG00000225928.2	1.98764	6.86719e-07	0.000328312	CACYBPP1	10	84454679	84456056
ENSG00000197588.9	1.3149	8.32379e-07	0.000383527	KLKP1	19	50882096	50896398
ENSG00000215833.3	1.91749	8.83995e-07	0.000389514	QRSL1P1	1	168449672	168451211
ENSG00000273542.2	-1.00818	8.89417e-07	0.000389514	H4C12	6	27831174	27831560
ENSG00000258764.1	17.6739	9.37964e-07	0.000392728		14	60544400	60544654
ENSG00000134551.13	1.23545	9.64372e-07	0.000392728	PRH2	12	10929236	10934845
ENSG00000236888.1	2.29906	1.08955e-06	0.000402811	RPS20P5	1	57605847	57606206
ENSG00000109163.7	1.35701	1.22024e-06	0.000435739	GNRHR	4	67737118	67754388
ENSG00000254463.1	1.02892	1.44211e-06	0.000499593	PPIAP41	11	43466392	43466871
ENSG00000202356.1	18.8608	1.49767e-06	0.000511213	RNA5SP277	8	119891132	119891229
ENSG00000154734.16	-1.2652	1.78823e-06	0.000584258	ADAMTS1	21	26835755	26845409
ENSG00000228829.1	16.101	1.81236e-06	0.000584258		7	76173733	76177205
ENSG00000234995.1	1.31132	1.88758e-06	0.000600171	RPS3AP28	7	138490581	138491361
ENSG00000136688.11	7.00072	2.87237e-06	0.000854752	IL36G	2	112973203	112985658
ENSG00000236252.2	1.12129	2.92972e-06	0.000860782		9	65219987	65230861
ENSG00000063127.16	1.59509	3.06629e-06	0.000878664	SLC6A16	19	49289638	49325215
ENSG00000270524.1	1.2344	3.36843e-06	0.000953472	QTRT1P1	X	113882590	113883667
ENSG00000259691.2	1.15899	3.64103e-06	0.000994257	FKBP1AP2	15	73143236	73143518
ENSG00000152463.15	1.31218	3.68798e-06	0.00099537	OLAH	10	15032227	15073853
ENSG00000224430.2	1.97114	3.75038e-06	0.00100057	MKRN5P	X	74161062	74162528
ENSG00000272803.5	1.49076	3.9487e-06	0.00100372	PRH2	CHR_HSCHR12_2_CTG2	10929236	10932341
ENSG00000275679.4	1.49076	3.9487e-06	0.00100372	PRH2	CHR_HSCHR12_3_CTG2	10929236	10932341
ENSG00000264246.1	1.58492	4.06487e-06	0.00100372		18	4430945	4431152
ENSG00000271618.1	20.3673	4.19784e-06	0.00101496		1	71738173	71738354
ENSG00000270377.1	1.94813	4.37513e-06	0.00104692		3	32243847	32244018
ENSG00000278307.3	1.06798	4.56489e-06	0.00104922	TAS2R19	CHR_HSCHR12_3_CTG2	11021607	11022608
ENSG00000197580.13	1.09655	4.9703e-06	0.00111811	BCO2	11	112175510	112224699
ENSG00000181788.4	-1.06971	5.00983e-06	0.00111811	SIAH2	3	150741125	150763477
ENSG00000223650.1	1.94393	5.7516e-06	0.00125877	UHRF2P1	X	74105572	74107958
ENSG00000129654.8	-1.81509	5.87134e-06	0.00125877	FOXJ1	17	76136333	76141245
ENSG00000204619.8	-4.49996	5.90847e-06	0.00125877	PPP1R11	6	30066709	30070333
ENSG00000239704.12	1.19259	7.03913e-06	0.00144589	CDRT4	17	15436015	15475728
ENSG00000095739.11	-1.23715	8.12615e-06	0.00155881	BAMBI	10	28677510	28682932
ENSG00000276903.2	-1.32178	8.80824e-06	0.00160453	H2AC16	6	27865317	27865798
ENSG00000130988.13	-1.24779	9.41314e-06	0.00166785	RGN	X	47078355	47093314
ENSG00000066056.14	-1.17608	9.67568e-06	0.00168859	TIE1	1	43300982	43323108
ENSG00000254831.1	2.66329	1.04651e-05	0.00179931	KRT18P58	11	5993876	5994995
ENSG00000225222.2	1.44964	1.09443e-05	0.00184078	CHCHD4P5	1	246178778	246179204
ENSG00000248423.1	1.17501	1.12863e-05	0.00188465		8	15688914	15689562
ENSG00000222378.1	1.64037	1.14405e-05	0.00189675	RNA5SP44	1	39154164	39154296
ENSG00000237257.1	2.11835	1.17201e-05	0.00191574	MTND2P8	9	78741720	78742744
ENSG00000169777.7	1.95427	1.19854e-05	0.00193189	TAS2R1	5	9627347	9712378
ENSG00000129151.9	1.89847	1.24389e-05	0.00197754	BBOX1	11	27040725	27127809
ENSG00000230241.1	16.8239	1.272e-05	0.00200846		X	48135658	48136159
ENSG00000187553.10	4.22151	1.37834e-05	0.00209325	CYP26C1	10	93060798	93069540
ENSG00000165383.12	1.38595	1.38882e-05	0.00209325	LRRC18	10	48909480	48939840
ENSG00000223518.5	1.53224	1.4288e-05	0.00209387	CSNK1A1P1	15	36798596	36818459
ENSG00000236913.1	1.62051	1.69776e-05	0.0023739	RPS13P3	2	42469817	42470266
ENSG00000166407.14	4.37599	1.73546e-05	0.00240793	LMO1	11	8224309	8268716
ENSG00000232526.1	1.52348	1.7636e-05	0.00240793	VDAC1P13	2	42463139	42463997
ENSG00000241228.1	1.67654	1.8201e-05	0.00243852	RPL12P31	11	35997226	35997675
ENSG00000137270.11	1.19303	1.8502e-05	0.00243852	GCM1	6	53126961	53148841
ENSG00000224055.1	1.4993	1.85045e-05	0.00243852	GAPDHP55	15	44063511	44064313
ENSG00000184557.4	-1.16601	1.85954e-05	0.00243852	SOCS3	17	78356778	78360077
ENSG00000270799.1	1.20239	1.88458e-05	0.00244374		2	174171891	174172725
ENSG00000201356.1	19.8511	1.91577e-05	0.00245933	RNA5SP500	X	28982852	28982970
ENSG00000251682.1	1.45456	2.0988e-05	0.00255054		5	61347126	61347716
ENSG00000231965.4	1.15526	2.24443e-05	0.00261722		8	11175051	11175570
ENSG00000285026.1	1.15526	2.24443e-05	0.00261722		CHR_HG76_PATCH	8776061	8776580
ENSG00000229887.4	2.02171	2.25516e-05	0.00261722	HNRNPA1P6	1	58047889	58049335
ENSG00000218596.2	1.38252	2.31633e-05	0.00264978		6	156976294	156977072
ENSG00000099256.19	-1.06455	2.41756e-05	0.00272049	PRTFDC1	10	24848614	24952606
ENSG00000271159.1	1.74668	2.42618e-05	0.00272049	HINT1P2	7	95018163	95018397
ENSG00000042304.13	1.2172	2.5667e-05	0.00285051	C2orf83	2	227610090	227648606
ENSG00000203647.2	1.43756	2.58843e-05	0.00286095		3	66008770	66009200
ENSG00000145920.15	1.54884	2.7602e-05	0.00297334	CPLX2	5	175796310	175884021
ENSG00000267920.1	1.18224	2.79078e-05	0.002982	SNX6P1	19	23126569	23127792
ENSG00000141316.13	1.36465	2.89254e-05	0.00302409	SPACA3	17	32970376	32997877
ENSG00000184785.6	-1.18658	2.97737e-05	0.00307145	SMIM10	X	134990991	134992473
ENSG00000163534.15	1.07975	3.0704e-05	0.00310605	FCRL1	1	157794403	157820120
ENSG00000249751.4	-1.45649	3.11585e-05	0.00310605	ECSCR	5	139448560	139462743
ENSG00000288297.1	-1.45649	3.11585e-05	0.00310605	ECSCR	CHR_HG1395_PATCH	139448560	139462009
ENSG00000276184.4	-1.07951	3.11796e-05	0.00310605	UPK3B	CHR_HSCHR7_2_CTG4_4	76510496	76515744
ENSG00000105974.13	-1.8576	3.25795e-05	0.00317282	CAV1	7	116524994	116561179
ENSG00000175899.15	1.31677	3.28587e-05	0.00317785	A2M	12	9067664	9116229
ENSG00000239438.1	8.01114	3.3303e-05	0.00320504	RPS26P48	14	78231281	78231619
ENSG00000232928.2	1.86114	3.35541e-05	0.00320504	DDX3P1	X	74121012	74131923
ENSG00000137267.7	-1.00916	3.47672e-05	0.00324089	TUBB2A	6	3153497	3157544
ENSG00000168263.9	1.17085	3.5025e-05	0.00325186	KCNV2	9	2717510	2730037
ENSG00000253304.2	-1.23355	3.53324e-05	0.00325437	TMEM200B	1	29119429	29123903
ENSG00000225505.1	1.21613	3.618e-05	0.00328036		1	92732000	92733257
ENSG00000101440.10	1.25393	3.83336e-05	0.00339882	ASIP	20	34194569	34269344
ENSG00000136167.15	-1.94852	3.8365e-05	0.00339882	LCP1	13	46125920	46211871
ENSG00000254792.1	1.21819	4.01049e-05	0.00349728		11	67840942	67841049
ENSG00000250933.1	1.26351	4.03075e-05	0.00349728	GAPDHP66	18	3977649	3978615
ENSG00000115758.14	-1.17337	4.03116e-05	0.00349728	ODC1	2	10439968	10448327
ENSG00000234925.2	1.23408	4.05884e-05	0.00349728	ATP5PDP4	12	68642519	68642993
ENSG00000102290.23	1.03581	4.08325e-05	0.00349728	PCDH11X	X	91779261	92623230
ENSG00000219384.1	1.06924	4.28492e-05	0.00361276		6	45158870	45159511
ENSG00000160654.11	1.09946	4.30338e-05	0.00361276	CD3G	11	118344344	118355161
ENSG00000119888.11	-1.21083	4.33927e-05	0.00362298	EPCAM	2	47345158	47387601
ENSG00000213197.3	1.19497	4.42757e-05	0.00365345	NUDCP1	2	152389937	152390630
ENSG00000212124.2	1.03824	4.58966e-05	0.00371187	TAS2R19	12	11021619	11022620
ENSG00000263028.1	1.03824	4.58966e-05	0.00371187	TAS2R19	CHR_HSCHR12_2_CTG2	11021619	11022620
ENSG00000219926.11	1.312	4.70347e-05	0.00378444	OR7E104P	13	63828840	63844125
ENSG00000265099.1	1.39483	4.85978e-05	0.00384984		17	20938023	20938344
ENSG00000280658.1	-23.1976	5.03656e-05	0.00393615		CHR_HSCHR6_1_CTG8	127659425	127660338
ENSG00000249019.2	1.29916	5.21095e-05	0.00402214		4	39713842	39714451
ENSG00000254794.1	18.9399	5.22078e-05	0.00402214		11	87917948	87917999
ENSG00000230546.1	2.50987	5.23323e-05	0.00402214		1	58084419	58084559
ENSG00000229015.2	2.30191	5.33452e-05	0.00404355		X	135396429	135397764
ENSG00000248477.6	2.59666	5.34652e-05	0.00404355	NAIPP3	5	69607099	69624049
ENSG00000188620.11	1.99315	5.3482e-05	0.00404355	HMX3	10	123135970	123139423
ENSG00000069493.15	1.17587	5.38508e-05	0.00405821	CLEC2D	12	9664969	9699553
ENSG00000229894.5	1.00022	5.44234e-05	0.00407491	GK3P	4	165277807	165279704
ENSG00000242888.1	1.12703	5.60974e-05	0.00415486		14	99974336	99975149
ENSG00000258968.2	1.26591	5.63496e-05	0.00415486		14	31018446	31018796
ENSG00000276545.1	1.03269	5.65957e-05	0.00415486	PCDHGB9P	5	141439853	141442449
ENSG00000219547.1	1.68163	5.68847e-05	0.00415486	RPL17P25	6	80374015	80374569
ENSG00000260582.1	1.34478	5.71436e-05	0.00415486	TPST2P1	15	36626674	36627775
ENSG00000185862.7	1.12805	5.71917e-05	0.00415486	EVI2B	17	31303770	31314105
ENSG00000073605.19	1.05859	5.74603e-05	0.00415486	GSDMB	17	39904595	39919854
ENSG00000179532.13	1.00194	5.77201e-05	0.00416069	DNHD1	11	6497260	6593758
ENSG00000117600.14	-1.38816	5.81049e-05	0.00417546	PLPPR4	1	99264292	99309590
ENSG00000243508.1	1.09891	6.09388e-05	0.00427695	DNAJB6P7	3	125344085	125344797
ENSG00000233890.6	5.58854	6.09914e-05	0.00427695	TCF19	CHR_HSCHR6_MHC_DBB_CTG1	31152269	31157938
ENSG00000165617.15	-2.0341	6.12315e-05	0.00428086	DACT1	14	58633967	58648321
ENSG00000248916.1	1.17538	6.15716e-05	0.00428803	NUP210P3	3	129323046	129325426
ENSG00000285723.1	15.2214	6.17036e-05	0.00428803	MKKS	20	10420546	10420737
ENSG00000234619.1	1.30241	6.34912e-05	0.00439737	RPL7P11	1	8750430	8751087
ENSG00000127863.16	1.22598	6.38773e-05	0.00439957	TNFRSF19	13	23570370	23676104
ENSG00000223427.1	1.88556	6.8863e-05	0.0046401	RBM7P1	2	80162428	80163135
ENSG00000168003.19	-1.03192	6.96069e-05	0.0046401	SLC3A2	11	62856004	62888880
ENSG00000234227.1	2.43146	7.12357e-05	0.00466196	RPL7L1P1	13	89833157	89833941
ENSG00000204262.14	-1.12778	7.21109e-05	0.00469898	COL5A2	2	189031898	189225312
ENSG00000218499.1	-23.364	7.40673e-05	0.00476226		6	138393373	138393544
ENSG00000270393.1	1.65147	7.47867e-05	0.00479523		22	19018043	19018916
ENSG00000163072.16	1.11341	7.95649e-05	0.00501842	NOSTRIN	2	168786539	168865514
ENSG00000248449.2	1.00309	8.02005e-05	0.00503117	PCDHGB8P	5	141426286	141429158
ENSG00000169554.23	2.07624	8.26307e-05	0.00511451	ZEB2	2	144364364	144521057
ENSG00000256056.1	1.19945	8.61087e-05	0.00523423		12	27592461	27594039
ENSG00000243101.1	1.75071	8.68514e-05	0.00525202	RPS3P7	16	78825281	78826006
ENSG00000130830.15	-1.31581	8.74345e-05	0.00527128	MPP1	X	154778684	154821007
ENSG00000275199.4	1.09165	8.81023e-05	0.00528132	AKT3	CHR_HSCHR1_3_CTG32_1	243488233	243855434
ENSG00000206147.5	1.8854	8.93647e-05	0.00529404	RPL23AP57	9	6639139	6639604
ENSG00000227722.2	1.52699	8.98648e-05	0.00529404		1	168317497	168376876
ENSG00000073417.15	1.094	9.04016e-05	0.00530458	PDE8A	15	84980440	85139145
ENSG00000270236.1	1.73236	9.07293e-05	0.00530458		9	69107926	69108217
ENSG00000268864.4	1.13841	9.3412e-05	0.00540695		19	53599628	53608451
ENSG00000242575.1	1.06707	9.36878e-05	0.00540942	TUBAP13	2	153420677	153421957
ENSG00000227056.2	1.66584	9.6193e-05	0.00549363	RPL6P2	1	119219314	119220096
ENSG00000240404.2	7.71254	9.67752e-05	0.00549363		3	81612790	81613075
ENSG00000234031.1	1.35574	9.70282e-05	0.00549363	RPS3AP44	13	26576886	26577675
ENSG00000104894.12	1.61911	9.86668e-05	0.00553177	CD37	19	49335171	49343335
ENSG00000183389.5	1.37225	0.000100764	0.00560105	OR56A4	11	5999445	6006946
ENSG00000225650.2	1.24687	0.000100868	0.00560105	EIF2S2P5	1	114468315	114469282
ENSG00000237650.2	2.56987	0.000103705	0.00571758	OR11Q1P	X	131204068	131205010
ENSG00000138271.6	1.17486	0.000104196	0.005731	GPR87	3	151294086	151316820
ENSG00000201846.1	19.1802	0.000107129	0.00582759	RNA5SP166	4	148557947	148558048
ENSG00000225406.1	1.43866	0.000107207	0.00582759	ELF2P4	2	185547135	185547818
ENSG00000206454.12	-1.88034	0.000108038	0.00584537	POU5F1	CHR_HSCHR6_MHC_QBL_CTG1	31156777	31163150
ENSG00000237582.10	-1.88034	0.000108038	0.00584537	POU5F1	CHR_HSCHR6_MHC_SSTO_CTG1	31159218	31165590
ENSG00000227152.6	1.16062	0.000109796	0.00588311	OR2T7	1	248436359	248444316
ENSG00000229241.1	1.58828	0.000109874	0.00588311	PNPT1P1	3	3981981	3984295
ENSG00000086570.13	1.00329	0.000110377	0.00588311	FAT2	5	151504092	151591331
ENSG00000235413.3	1.18855	0.000112874	0.00598157	KRT18P63	4	17911674	17912976
ENSG00000240392.1	1.46878	0.000117185	0.00605764	RPL9P3	14	35262462	35263036
ENSG00000232587.1	1.03883	0.000121767	0.00622095	EEF1A1P3	13	28214513	28215897
ENSG00000239212.2	1.60079	0.000123968	0.00628259	RPL6P7	3	155657760	155658612
ENSG00000115963.14	-1.06477	0.000124813	0.00628839	RND3	2	150468195	150539011
ENSG00000256984.2	1.01404	0.000128422	0.00635083		12	31012503	31015806
ENSG00000114019.15	-1.2156	0.000130124	0.00637196	AMOTL2	3	134355347	134375479
ENSG00000251155.2	19.9201	0.000133307	0.00644622	SEPTIN14P4	4	118640673	118640858
ENSG00000118523.6	-1.18535	0.000135276	0.00645392	CCN2	6	131948176	131951372
ENSG00000151062.15	1.54867	0.000137359	0.00645392	CACNA2D4	12	1791963	1918666
ENSG00000284953.2	1.54867	0.000137359	0.00645392	CACNA2D4	CHR_HG1815_PATCH	1791963	1918666
ENSG00000260802.2	-1.47061	0.000140354	0.0065275	SERTM2	X	111511645	111522399
ENSG00000224593.1	1.44341	0.00014136	0.00654914		7	3337889	3338601
ENSG00000069482.7	-1.36823	0.000142187	0.00656803	GAL	11	68683779	68691175
ENSG00000259738.1	-7.84289	0.00014449	0.00665241	ZNF444P1	15	58865006	58865303
ENSG00000171867.18	-1.12679	0.000144782	0.00665241	PRNP	20	4686350	4701590
ENSG00000159176.14	-1.37654	0.000149645	0.00673747	CSRP1	1	201483530	201509456
ENSG00000233998.1	1.33751	0.000153549	0.00685389	SETP5	9	137640986	137641547
ENSG00000256399.1	1.43137	0.000155735	0.00692485		12	63887379	63888598
ENSG00000139865.17	1.13148	0.000157333	0.0069559	TTC6	14	37595629	38041442
ENSG00000237088.1	1.97287	0.000167119	0.00722345	RPL7AP48	9	20532552	20533339
ENSG00000284636.1	17.9143	0.000168704	0.00723547		4	9000841	9001058
ENSG00000111215.12	1.3427	0.000169537	0.00723547	PRR4	12	10845849	10849475
ENSG00000237307.2	1.76843	0.000169557	0.00723547	SRRM1P3	X	136976417	136985705
ENSG00000141338.15	1.13642	0.000171227	0.00726872	ABCA8	17	68867289	68955392
ENSG00000235687.9	1.1384	0.000171298	0.00726872	LINC00993	10	37248118	37347031
ENSG00000235967.1	1.62	0.000177336	0.00741648	COX5BP3	7	133727368	133727734
ENSG00000142694.7	-1.55902	0.000184129	0.00759113	EVA1B	1	36322030	36324154
ENSG00000220541.4	1.94457	0.000185539	0.00762219	PPIHP2	X	113522482	113522989
ENSG00000103257.9	-1.70943	0.000190575	0.00772304	SLC7A5	16	87830023	87869507
ENSG00000133636.11	-1.64367	0.000193363	0.00779341	NTS	12	85874295	85882992
ENSG00000240083.2	2.2485	0.00019368	0.00779341	RPS3AP22	5	88381957	88382725
ENSG00000105825.14	-1.26285	0.000193736	0.00779341	TFPI2	7	93885396	93890753
ENSG00000101255.12	-2.13859	0.000204298	0.00796967	TRIB3	20	362835	397559
ENSG00000120500.19	1.49003	0.000205033	0.00797156	ARR3	X	70268305	70281840
ENSG00000143632.15	-1.99629	0.000208273	0.00801695	ACTA1	1	229430365	229434104
ENSG00000155307.19	-2.0647	0.000213002	0.00812547	SAMSN1	21	14485228	14658821
ENSG00000067840.13	-1.45959	0.000220594	0.00829028	PDZD4	X	153802166	153830565
ENSG00000259845.1	1.47415	0.000222869	0.00835703	HERC2P10	15	30815271	30844153
ENSG00000230276.2	1.86138	0.000234291	0.00854593		9	29254075	29254426
ENSG00000141449.16	2.85227	0.000239442	0.00857798	GREB1L	18	21242232	21526112
ENSG00000128165.9	-1.00645	0.000245311	0.00866698	ADM2	22	50481543	50486440
ENSG00000284493.2	19.293	0.000245367	0.00866698		CHR_HG926_PATCH	22321945	22327924
ENSG00000226234.2	2.06222	0.000245826	0.00866698	KRT18P24	9	79036413	79037568
ENSG00000213199.8	1.32642	0.000248523	0.0087187	ASIC3	7	151048292	151052756
ENSG00000201861.1	1.01694	0.000250695	0.00873706	RNA5SP298	10	282015	282125
ENSG00000253159.3	1.03158	0.000257791	0.00881235	PCDHGA12	5	141430507	141512975
ENSG00000237757.2	1.19515	0.000260694	0.00885941	EEF1A1P30	X	120210461	120212680
ENSG00000233737.3	7.14287	0.000263663	0.00892109		11	93221486	93221630
ENSG00000236698.1	6.30561	0.000264439	0.00892136	EIF1AXP1	1	16685621	16686055
ENSG00000175564.13	1.25852	0.000269635	0.0090067	UCP3	11	74000277	74009085
ENSG00000244486.9	-1.28047	0.000276848	0.00911478	SCARF2	22	20424584	20437826
ENSG00000114200.10	-1.30716	0.000279139	0.00913707	BCHE	3	165772904	165837462
ENSG00000122872.8	1.16213	0.000279388	0.00913707	ARL4AP1	10	60684505	60685209
ENSG00000229567.1	-20.9139	0.000279389	0.00913707		1	93278961	93279129
ENSG00000229088.1	1.16017	0.000283287	0.00919948	MTND1P10	22	36178554	36179385
ENSG00000139832.5	-1.09378	0.000287106	0.00924275	RAB20	13	110523066	110561722
ENSG00000228056.3	1.04501	0.000295663	0.0093624	CFL1P3	1	63843196	63843685
ENSG00000225726.1	1.15279	0.000301645	0.00949998		7	77071751	77072237
ENSG00000116106.12	1.87389	0.000305185	0.00958546	EPHA4	2	221418027	221574202
ENSG00000230327.1	1.12753	0.00030784	0.00961679	MTCO1P42	2	50588690	50589415
ENSG00000241644.2	1.27737	0.000308827	0.00963467	INMT	7	30697985	30757602
ENSG00000140044.13	-1.46842	0.00031134	0.00967094	JDP2	14	75427716	75474111
ENSG00000142871.18	-1.19315	0.000317502	0.00977391	CCN1	1	85580761	85584589
ENSG00000248905.10	1.54523	0.000325391	0.00992463	FMN1	15	32765544	33194714

## Sheet: Pansio-1
source	term_id	term_name	term_size	pansio_up_overlap	pansio_up_hits	pansio_up_padj	pansio_down_overlap	pansio_down_hits	pansio_down_padj	shared_with_WT_H1
KEGG	KEGG:05213	Endometrial cancer	57	2	ENSG00000138795,ENSG00000132906	0.0384084				FALSE
TF	TF:M12412_1	Factor: ZFP57; motif: NNNTTGCCGCANN; match class: 1	6				2	ENSG00000198300,ENSG00000269699	0.0292167	FALSE

## Sheet: Olonne-18
source	term_id	term_name	term_size	olonne_up_overlap	olonne_up_hits	olonne_up_padj	olonne_down_overlap	olonne_down_hits	olonne_down_padj	shared_with_WT_H1
GO:MF	GO:0000981	DNA-binding transcription factor activity, RNA polymerase II-specific	1339	8	ENSG00000198300,ENSG00000162761,ENSG00000204335,ENSG00000138795,ENSG00000107249,ENSG00000169554,ENSG00000138083,ENSG00000204612	0.0121615	1	ENSG00000180938	1	FALSE
GO:MF	GO:0000977	RNA polymerase II transcription regulatory region sequence-specific DNA binding	1366	8	ENSG00000198300,ENSG00000162761,ENSG00000204335,ENSG00000138795,ENSG00000107249,ENSG00000169554,ENSG00000138083,ENSG00000204612	0.0140421	1	ENSG00000180938	1	FALSE
GO:MF	GO:0003700	DNA-binding transcription factor activity	1387	8	ENSG00000198300,ENSG00000162761,ENSG00000204335,ENSG00000138795,ENSG00000107249,ENSG00000169554,ENSG00000138083,ENSG00000204612	0.0156692	1	ENSG00000180938	1	FALSE
GO:MF	GO:0140110	transcription regulator activity	1857	9	ENSG00000198300,ENSG00000162761,ENSG00000204335,ENSG00000138795,ENSG00000107249,ENSG00000015153,ENSG00000169554,ENSG00000138083,ENSG00000204612	0.0174603	1	ENSG00000180938	1	FALSE
GO:MF	GO:0000976	transcription cis-regulatory region binding	1459	8	ENSG00000198300,ENSG00000162761,ENSG00000204335,ENSG00000138795,ENSG00000107249,ENSG00000169554,ENSG00000138083,ENSG00000204612	0.0225074	1	ENSG00000180938	1	FALSE
GO:MF	GO:0001067	transcription regulatory region nucleic acid binding	1460	8	ENSG00000198300,ENSG00000162761,ENSG00000204335,ENSG00000138795,ENSG00000107249,ENSG00000169554,ENSG00000138083,ENSG00000204612	0.0226177	1	ENSG00000180938	1	FALSE
GO:MF	GO:1990837	sequence-specific double-stranded DNA binding	1514	8	ENSG00000198300,ENSG00000162761,ENSG00000204335,ENSG00000138795,ENSG00000107249,ENSG00000169554,ENSG00000138083,ENSG00000204612	0.0292852	1	ENSG00000180938	1	FALSE
GO:MF	GO:0003677	DNA binding	2035	9	ENSG00000198300,ENSG00000162761,ENSG00000204335,ENSG00000138795,ENSG00000107249,ENSG00000015153,ENSG00000169554,ENSG00000138083,ENSG00000204612	0.0359782	2	ENSG00000180938,ENSG00000276410	1	FALSE
WP	WP:WP4540	Hippo signaling regulation pathways	99	3	ENSG00000113100,ENSG00000138795,ENSG00000113361	0.0389221				FALSE
GO:MF	GO:0043565	sequence-specific DNA binding	1594	8	ENSG00000198300,ENSG00000162761,ENSG00000204335,ENSG00000138795,ENSG00000107249,ENSG00000169554,ENSG00000138083,ENSG00000204612	0.0421433	1	ENSG00000180938	1	FALSE
GO:MF	GO:0003690	double-stranded DNA binding	1604	8	ENSG00000198300,ENSG00000162761,ENSG00000204335,ENSG00000138795,ENSG00000107249,ENSG00000169554,ENSG00000138083,ENSG00000204612	0.0440399	1	ENSG00000180938	1	FALSE
GO:BP	GO:0044851	hair cycle phase	4				2	ENSG00000069482,ENSG00000133710	0.0198775	FALSE
GO:BP	GO:0044848	biological phase	4				2	ENSG00000069482,ENSG00000133710	0.0198775	FALSE
GO:BP	GO:0048819	regulation of hair follicle maturation	4				2	ENSG00000069482,ENSG00000133710	0.0198775	FALSE
GO:BP	GO:0048820	hair follicle maturation	5				2	ENSG00000069482,ENSG00000133710	0.0330991	FALSE

## Sheet: Keppel-19
source	term_id	term_name	term_size	keppel_up_overlap	keppel_up_hits	keppel_up_padj	keppel_down_overlap	keppel_down_hits	keppel_down_padj	shared_with_WT_H1
GO:MF	GO:0000977	RNA polymerase II transcription regulatory region sequence-specific DNA binding	1366	13	ENSG00000099284,ENSG00000162761,ENSG00000057657,ENSG00000204335,ENSG00000185551,ENSG00000138795,ENSG00000107249,ENSG00000169554,ENSG00000091656,ENSG00000138083,ENSG00000120149,ENSG00000204612,ENSG00000007372	0.00107362	3	ENSG00000180938,ENSG00000180787,ENSG00000197928	1	FALSE
GO:MF	GO:0000976	transcription cis-regulatory region binding	1459	13	ENSG00000099284,ENSG00000162761,ENSG00000057657,ENSG00000204335,ENSG00000185551,ENSG00000138795,ENSG00000107249,ENSG00000169554,ENSG00000091656,ENSG00000138083,ENSG00000120149,ENSG00000204612,ENSG00000007372	0.00222967	3	ENSG00000180938,ENSG00000180787,ENSG00000197928	1	FALSE
GO:MF	GO:0001067	transcription regulatory region nucleic acid binding	1460	13	ENSG00000099284,ENSG00000162761,ENSG00000057657,ENSG00000204335,ENSG00000185551,ENSG00000138795,ENSG00000107249,ENSG00000169554,ENSG00000091656,ENSG00000138083,ENSG00000120149,ENSG00000204612,ENSG00000007372	0.00224657	3	ENSG00000180938,ENSG00000180787,ENSG00000197928	1	FALSE
GO:MF	GO:1990837	sequence-specific double-stranded DNA binding	1514	13	ENSG00000099284,ENSG00000162761,ENSG00000057657,ENSG00000204335,ENSG00000185551,ENSG00000138795,ENSG00000107249,ENSG00000169554,ENSG00000091656,ENSG00000138083,ENSG00000120149,ENSG00000204612,ENSG00000007372	0.0033476	3	ENSG00000180938,ENSG00000180787,ENSG00000197928	1	FALSE
GO:MF	GO:0000981	DNA-binding transcription factor activity, RNA polymerase II-specific	1339	12	ENSG00000162761,ENSG00000057657,ENSG00000204335,ENSG00000185551,ENSG00000138795,ENSG00000107249,ENSG00000169554,ENSG00000091656,ENSG00000138083,ENSG00000120149,ENSG00000204612,ENSG00000007372	0.00543338	3	ENSG00000180938,ENSG00000180787,ENSG00000197928	1	FALSE
GO:MF	GO:0043565	sequence-specific DNA binding	1594	13	ENSG00000099284,ENSG00000162761,ENSG00000057657,ENSG00000204335,ENSG00000185551,ENSG00000138795,ENSG00000107249,ENSG00000169554,ENSG00000091656,ENSG00000138083,ENSG00000120149,ENSG00000204612,ENSG00000007372	0.00586168	3	ENSG00000180938,ENSG00000180787,ENSG00000197928	1	FALSE
GO:MF	GO:0003690	double-stranded DNA binding	1604	13	ENSG00000099284,ENSG00000162761,ENSG00000057657,ENSG00000204335,ENSG00000185551,ENSG00000138795,ENSG00000107249,ENSG00000169554,ENSG00000091656,ENSG00000138083,ENSG00000120149,ENSG00000204612,ENSG00000007372	0.00627165	3	ENSG00000180938,ENSG00000180787,ENSG00000197928	1	FALSE
GO:MF	GO:0003700	DNA-binding transcription factor activity	1387	12	ENSG00000162761,ENSG00000057657,ENSG00000204335,ENSG00000185551,ENSG00000138795,ENSG00000107249,ENSG00000169554,ENSG00000091656,ENSG00000138083,ENSG00000120149,ENSG00000204612,ENSG00000007372	0.00775461	3	ENSG00000180938,ENSG00000180787,ENSG00000197928	1	FALSE
GO:BP	GO:0007275	multicellular organism development	3260	20	ENSG00000185862,ENSG00000099284,ENSG00000107796,ENSG00000162761,ENSG00000057657,ENSG00000090776,ENSG00000071909,ENSG00000185551,ENSG00000138795,ENSG00000138829,ENSG00000116106,ENSG00000169554,ENSG00000141449,ENSG00000171617,ENSG00000116729,ENSG00000138083,ENSG00000120149,ENSG00000132906,ENSG00000108231,ENSG00000007372	0.0140651	6	ENSG00000113209,ENSG00000168234,ENSG00000133710,ENSG00000117600,ENSG00000164129,ENSG00000118785	1	FALSE
GO:MF	GO:0003677	DNA binding	2035	14	ENSG00000099284,ENSG00000162761,ENSG00000057657,ENSG00000204335,ENSG00000185551,ENSG00000138795,ENSG00000107249,ENSG00000015153,ENSG00000169554,ENSG00000091656,ENSG00000138083,ENSG00000120149,ENSG00000204612,ENSG00000007372	0.0169053	4	ENSG00000180938,ENSG00000276410,ENSG00000180787,ENSG00000197928	1	FALSE
GO:BP	GO:0010558	negative regulation of macromolecule biosynthetic process	1226	12	ENSG00000099284,ENSG00000057657,ENSG00000185551,ENSG00000138795,ENSG00000107249,ENSG00000015153,ENSG00000169554,ENSG00000171617,ENSG00000165655,ENSG00000138083,ENSG00000120149,ENSG00000007372	0.022638				FALSE
GO:BP	GO:0045892	negative regulation of transcription, DNA-templated	1027	11	ENSG00000099284,ENSG00000057657,ENSG00000185551,ENSG00000138795,ENSG00000107249,ENSG00000015153,ENSG00000169554,ENSG00000165655,ENSG00000138083,ENSG00000120149,ENSG00000007372	0.0245723				FALSE
GO:BP	GO:1903507	negative regulation of nucleic acid-templated transcription	1032	11	ENSG00000099284,ENSG00000057657,ENSG00000185551,ENSG00000138795,ENSG00000107249,ENSG00000015153,ENSG00000169554,ENSG00000165655,ENSG00000138083,ENSG00000120149,ENSG00000007372	0.0257195				FALSE
GO:BP	GO:1902679	negative regulation of RNA biosynthetic process	1033	11	ENSG00000099284,ENSG00000057657,ENSG00000185551,ENSG00000138795,ENSG00000107249,ENSG00000015153,ENSG00000169554,ENSG00000165655,ENSG00000138083,ENSG00000120149,ENSG00000007372	0.0259545				FALSE
GO:BP	GO:0030154	cell differentiation	2793	18	ENSG00000185862,ENSG00000099284,ENSG00000107796,ENSG00000162761,ENSG00000057657,ENSG00000090776,ENSG00000185551,ENSG00000138795,ENSG00000138829,ENSG00000116106,ENSG00000169554,ENSG00000165655,ENSG00000138083,ENSG00000120149,ENSG00000132906,ENSG00000108231,ENSG00000204612,ENSG00000007372	0.0277747	4	ENSG00000197181,ENSG00000133710,ENSG00000117600,ENSG00000118785	1	FALSE
GO:MF	GO:0140110	transcription regulator activity	1857	13	ENSG00000162761,ENSG00000057657,ENSG00000204335,ENSG00000185551,ENSG00000138795,ENSG00000107249,ENSG00000015153,ENSG00000169554,ENSG00000091656,ENSG00000138083,ENSG00000120149,ENSG00000204612,ENSG00000007372	0.0296709	3	ENSG00000180938,ENSG00000180787,ENSG00000197928	1	FALSE
GO:BP	GO:0048869	cellular developmental process	2812	18	ENSG00000185862,ENSG00000099284,ENSG00000107796,ENSG00000162761,ENSG00000057657,ENSG00000090776,ENSG00000185551,ENSG00000138795,ENSG00000138829,ENSG00000116106,ENSG00000169554,ENSG00000165655,ENSG00000138083,ENSG00000120149,ENSG00000132906,ENSG00000108231,ENSG00000204612,ENSG00000007372	0.0305746	4	ENSG00000197181,ENSG00000133710,ENSG00000117600,ENSG00000118785	1	FALSE
GO:BP	GO:0031327	negative regulation of cellular biosynthetic process	1267	12	ENSG00000099284,ENSG00000057657,ENSG00000185551,ENSG00000138795,ENSG00000107249,ENSG00000015153,ENSG00000169554,ENSG00000171617,ENSG00000165655,ENSG00000138083,ENSG00000120149,ENSG00000007372	0.0315395				FALSE
GO:BP	GO:0048856	anatomical structure development	4126	22	ENSG00000185862,ENSG00000099284,ENSG00000107796,ENSG00000162761,ENSG00000057657,ENSG00000090776,ENSG00000071909,ENSG00000185551,ENSG00000138795,ENSG00000138829,ENSG00000116106,ENSG00000169554,ENSG00000141449,ENSG00000171617,ENSG00000116729,ENSG00000138083,ENSG00000120149,ENSG00000132906,ENSG00000108231,ENSG00000204612,ENSG00000007372,ENSG00000113361	0.0360487	7	ENSG00000197181,ENSG00000113209,ENSG00000168234,ENSG00000133710,ENSG00000117600,ENSG00000164129,ENSG00000118785	1	FALSE
GO:BP	GO:0009890	negative regulation of biosynthetic process	1290	12	ENSG00000099284,ENSG00000057657,ENSG00000185551,ENSG00000138795,ENSG00000107249,ENSG00000015153,ENSG00000169554,ENSG00000171617,ENSG00000165655,ENSG00000138083,ENSG00000120149,ENSG00000007372	0.0377734				FALSE
GO:MF	GO:0000978	RNA polymerase II cis-regulatory region sequence-specific DNA binding	1151	10	ENSG00000057657,ENSG00000204335,ENSG00000185551,ENSG00000138795,ENSG00000107249,ENSG00000169554,ENSG00000091656,ENSG00000138083,ENSG00000204612,ENSG00000007372	0.0443566	2	ENSG00000180938,ENSG00000197928	1	FALSE
GO:BP	GO:0032502	developmental process	4530	23	ENSG00000185862,ENSG00000099284,ENSG00000107796,ENSG00000162761,ENSG00000057657,ENSG00000090776,ENSG00000071909,ENSG00000185551,ENSG00000138795,ENSG00000138829,ENSG00000116106,ENSG00000169554,ENSG00000141449,ENSG00000171617,ENSG00000116729,ENSG00000165655,ENSG00000138083,ENSG00000120149,ENSG00000132906,ENSG00000108231,ENSG00000204612,ENSG00000007372,ENSG00000113361	0.0445391	7	ENSG00000197181,ENSG00000113209,ENSG00000168234,ENSG00000133710,ENSG00000117600,ENSG00000164129,ENSG00000118785	1	FALSE
GO:BP	GO:0030223	neutrophil differentiation	4	2	ENSG00000185862,ENSG00000138795	0.049039				FALSE
CORUM	CORUM:5412	HTR1D homodimer complex	1				1	ENSG00000179546	0.0496775	FALSE
WP	WP:WP4790	FGF23 signaling in hypophosphatemic rickets and related disorders	22				2	ENSG00000118785,ENSG00000115339	0.0498979	FALSE

## Sheet: WT_H1
source	term_id	term_name	term_size	H1_up_overlap	H1_up_hits	H1_up_padj	H1_down_overlap	H1_down_hits	H1_down_padj
TF	TF:M02087	Factor: CDX-2; motif: TTTATN	10094	47	ENSG00000212124,ENSG00000102290,ENSG00000134551,ENSG00000073417,ENSG00000175899,ENSG00000066405,ENSG00000239704,ENSG00000183389,ENSG00000285723,ENSG00000185862,ENSG00000179532,ENSG00000127863,ENSG00000165383,ENSG00000129151,ENSG00000136688,ENSG00000197580,ENSG00000138271,ENSG00000169777,ENSG00000137270,ENSG00000152463,ENSG00000168263,ENSG00000111215,ENSG00000176049,ENSG00000229894,ENSG00000160654…	4.16444e-05	28	ENSG00000204619,ENSG00000176928,ENSG00000184785,ENSG00000133636,ENSG00000139832,ENSG00000143632,ENSG00000103257,ENSG00000119888,ENSG00000142871,ENSG00000136997,ENSG00000137267,ENSG00000140044,ENSG00000117600,ENSG00000136167,ENSG00000115758,ENSG00000118523,ENSG00000105825,ENSG00000066056,ENSG00000154734,ENSG00000101255,ENSG00000273542,ENSG00000171867,ENSG00000118785,ENSG00000155307,ENSG00000260802…	1
TF	TF:M04073	Factor: POU2F2; motif: NWTRMATATKCAWN	4179	30	ENSG00000212124,ENSG00000102290,ENSG00000134551,ENSG00000073417,ENSG00000175899,ENSG00000185862,ENSG00000127863,ENSG00000129151,ENSG00000197580,ENSG00000169777,ENSG00000137270,ENSG00000152463,ENSG00000163534,ENSG00000168263,ENSG00000176049,ENSG00000229894,ENSG00000141338,ENSG00000113100,ENSG00000253159,ENSG00000141316,ENSG00000163072,ENSG00000101440,ENSG00000120500,ENSG00000063127,ENSG00000151062…	6.00896e-05	8	ENSG00000204619,ENSG00000184785,ENSG00000105974,ENSG00000136167,ENSG00000105825,ENSG00000066056,ENSG00000273542,ENSG00000171867	1
TF	TF:M01324_1	Factor: BRN1; motif: NANNTATGCATAATNNA; match class: 1	1656	18	ENSG00000086570,ENSG00000175899,ENSG00000183389,ENSG00000285723,ENSG00000185862,ENSG00000127863,ENSG00000129151,ENSG00000169777,ENSG00000152463,ENSG00000163534,ENSG00000168263,ENSG00000229894,ENSG00000141338,ENSG00000113100,ENSG00000109163,ENSG00000151062,ENSG00000116106,ENSG00000069493	0.000403079	5	ENSG00000133636,ENSG00000136997,ENSG00000118785,ENSG00000155307,ENSG00000115963	1
TF	TF:M04068	Factor: POU1F1; motif: NNNATGMATAWTTAATN	3482	26	ENSG00000102290,ENSG00000134551,ENSG00000066405,ENSG00000285723,ENSG00000185862,ENSG00000127863,ENSG00000197580,ENSG00000138271,ENSG00000169777,ENSG00000137270,ENSG00000152463,ENSG00000168263,ENSG00000176049,ENSG00000229894,ENSG00000160654,ENSG00000141338,ENSG00000113100,ENSG00000141316,ENSG00000163072,ENSG00000073605,ENSG00000109163,ENSG00000063127,ENSG00000151062,ENSG00000116106,ENSG00000166407…	0.000488039	8	ENSG00000184785,ENSG00000139832,ENSG00000204262,ENSG00000136997,ENSG00000136167,ENSG00000066056,ENSG00000118785,ENSG00000260802	1
TF	TF:M08822	Factor: Msx-1; motif: WNGNAATTANV	6823	37	ENSG00000212124,ENSG00000102290,ENSG00000134551,ENSG00000086570,ENSG00000170579,ENSG00000073417,ENSG00000066405,ENSG00000239704,ENSG00000183389,ENSG00000285723,ENSG00000185862,ENSG00000127863,ENSG00000165383,ENSG00000129151,ENSG00000138271,ENSG00000169777,ENSG00000137270,ENSG00000163534,ENSG00000111215,ENSG00000176049,ENSG00000229894,ENSG00000141338,ENSG00000139865,ENSG00000104894,ENSG00000113100…	0.000645377	16	ENSG00000204619,ENSG00000183722,ENSG00000133636,ENSG00000143632,ENSG00000119888,ENSG00000117600,ENSG00000136167,ENSG00000165617,ENSG00000115758,ENSG00000095739,ENSG00000273542,ENSG00000118785,ENSG00000130830,ENSG00000155307,ENSG00000260802,ENSG00000114200	1
TF	TF:M04073_1	Factor: POU2F2; motif: NWTRMATATKCAWN; match class: 1	2424	21	ENSG00000102290,ENSG00000134551,ENSG00000073417,ENSG00000185862,ENSG00000127863,ENSG00000129151,ENSG00000137270,ENSG00000152463,ENSG00000168263,ENSG00000176049,ENSG00000229894,ENSG00000113100,ENSG00000253159,ENSG00000141316,ENSG00000163072,ENSG00000101440,ENSG00000151062,ENSG00000248905,ENSG00000116106,ENSG00000141449,ENSG00000187553	0.00122598	7	ENSG00000204619,ENSG00000184785,ENSG00000105974,ENSG00000136167,ENSG00000066056,ENSG00000273542,ENSG00000171867	1
TF	TF:M00672	Factor: TEF; motif: ATGTTWAYATAA	5951	33	ENSG00000212124,ENSG00000102290,ENSG00000134551,ENSG00000086570,ENSG00000175899,ENSG00000239704,ENSG00000185862,ENSG00000127863,ENSG00000213199,ENSG00000129151,ENSG00000136688,ENSG00000138271,ENSG00000169777,ENSG00000137270,ENSG00000152463,ENSG00000163534,ENSG00000111215,ENSG00000229894,ENSG00000160654,ENSG00000141338,ENSG00000139865,ENSG00000104894,ENSG00000113100,ENSG00000253159,ENSG00000163072…	0.00431807	15	ENSG00000204619,ENSG00000276903,ENSG00000184785,ENSG00000133636,ENSG00000114019,ENSG00000136167,ENSG00000115758,ENSG00000118523,ENSG00000273542,ENSG00000171867,ENSG00000118785,ENSG00000155307,ENSG00000260802,ENSG00000114200,ENSG00000115963	1
TF	TF:M00802	Factor: Pit-1; motif: NMTTCATAAWTATWNMNA	4742	29	ENSG00000212124,ENSG00000102290,ENSG00000175899,ENSG00000239704,ENSG00000183389,ENSG00000285723,ENSG00000127863,ENSG00000165383,ENSG00000197580,ENSG00000138271,ENSG00000169777,ENSG00000137270,ENSG00000152463,ENSG00000163534,ENSG00000168263,ENSG00000111215,ENSG00000229894,ENSG00000160654,ENSG00000139865,ENSG00000104894,ENSG00000113100,ENSG00000141316,ENSG00000163072,ENSG00000109163,ENSG00000101440…	0.00466386	10	ENSG00000176928,ENSG00000133636,ENSG00000103257,ENSG00000119888,ENSG00000204262,ENSG00000105974,ENSG00000136167,ENSG00000171867,ENSG00000118785,ENSG00000114200	1
TF	TF:M09646	Factor: Oct3; motif: NYWTTSWTATGCAAAT	5759	32	ENSG00000212124,ENSG00000102290,ENSG00000134551,ENSG00000086570,ENSG00000170579,ENSG00000183389,ENSG00000185862,ENSG00000127863,ENSG00000165383,ENSG00000213199,ENSG00000129151,ENSG00000197580,ENSG00000145920,ENSG00000169777,ENSG00000152463,ENSG00000163534,ENSG00000111215,ENSG00000229894,ENSG00000141338,ENSG00000104894,ENSG00000113100,ENSG00000163072,ENSG00000073605,ENSG00000109163,ENSG00000101440…	0.00728598	17	ENSG00000069482,ENSG00000276903,ENSG00000184785,ENSG00000133636,ENSG00000099256,ENSG00000117600,ENSG00000105974,ENSG00000136167,ENSG00000066056,ENSG00000154734,ENSG00000095739,ENSG00000273542,ENSG00000118785,ENSG00000260802,ENSG00000169116,ENSG00000114200,ENSG00000205362	1
HPA	HPA:0411272	retina; photoreceptor cells[≥Medium]	74	4	ENSG00000197580,ENSG00000168263,ENSG00000120500,ENSG00000248905	0.00888783	1	ENSG00000130830	1
HPA	HPA:0411271	retina; photoreceptor cells[≥Low]	78	4	ENSG00000197580,ENSG00000168263,ENSG00000120500,ENSG00000248905	0.0109349	1	ENSG00000130830	1
TF	TF:M01137	Factor: FOXO3A; motif: TRTAAACAANWN	3861	25	ENSG00000212124,ENSG00000134551,ENSG00000175899,ENSG00000066405,ENSG00000285723,ENSG00000185862,ENSG00000129151,ENSG00000136688,ENSG00000138271,ENSG00000169777,ENSG00000241644,ENSG00000111215,ENSG00000229894,ENSG00000141338,ENSG00000113100,ENSG00000253159,ENSG00000141316,ENSG00000163072,ENSG00000109163,ENSG00000063127,ENSG00000175564,ENSG00000151062,ENSG00000248905,ENSG00000116106,ENSG00000141449	0.0150252	13	ENSG00000184785,ENSG00000130988,ENSG00000204262,ENSG00000117600,ENSG00000114019,ENSG00000115758,ENSG00000105825,ENSG00000066056,ENSG00000101255,ENSG00000155307,ENSG00000067840,ENSG00000260802,ENSG00000114200	1
GO:CC	GO:0005887	integral component of plasma membrane	1554	14	ENSG00000102290,ENSG00000183389,ENSG00000185862,ENSG00000213199,ENSG00000163534,ENSG00000168263,ENSG00000160654,ENSG00000104894,ENSG00000253159,ENSG00000179915,ENSG00000109163,ENSG00000063127,ENSG00000116106,ENSG00000069493	0.0156914	3	ENSG00000117600,ENSG00000105974,ENSG00000066056	1
GO:CC	GO:0016021	integral component of membrane	2473	18	ENSG00000212124,ENSG00000102290,ENSG00000183389,ENSG00000185862,ENSG00000127863,ENSG00000213199,ENSG00000169777,ENSG00000163534,ENSG00000168263,ENSG00000160654,ENSG00000104894,ENSG00000253159,ENSG00000179915,ENSG00000109163,ENSG00000063127,ENSG00000151062,ENSG00000116106,ENSG00000069493	0.0176622	5	ENSG00000168003,ENSG00000103257,ENSG00000117600,ENSG00000105974,ENSG00000066056	1
TF	TF:M02909	Factor: Sox-4; motif: NNNNNAATTGTTNNNNN	4487	27	ENSG00000212124,ENSG00000175899,ENSG00000066405,ENSG00000183389,ENSG00000285723,ENSG00000185862,ENSG00000127863,ENSG00000197580,ENSG00000138271,ENSG00000169777,ENSG00000152463,ENSG00000241644,ENSG00000168263,ENSG00000229894,ENSG00000160654,ENSG00000141338,ENSG00000139865,ENSG00000113100,ENSG00000141316,ENSG00000163072,ENSG00000073605,ENSG00000101440,ENSG00000175564,ENSG00000248905,ENSG00000169554…	0.0201578	13	ENSG00000184785,ENSG00000133636,ENSG00000181788,ENSG00000204262,ENSG00000099256,ENSG00000117600,ENSG00000105825,ENSG00000154734,ENSG00000273542,ENSG00000130830,ENSG00000155307,ENSG00000260802,ENSG00000114200	1
TF	TF:M02087_1	Factor: CDX-2; motif: TTTATN; match class: 1	5091	29	ENSG00000212124,ENSG00000102290,ENSG00000134551,ENSG00000175899,ENSG00000066405,ENSG00000183389,ENSG00000185862,ENSG00000127863,ENSG00000165383,ENSG00000136688,ENSG00000197580,ENSG00000138271,ENSG00000169777,ENSG00000137270,ENSG00000152463,ENSG00000111215,ENSG00000176049,ENSG00000229894,ENSG00000141338,ENSG00000139865,ENSG00000104894,ENSG00000113100,ENSG00000253159,ENSG00000141316,ENSG00000109163…	0.0212772	16	ENSG00000204619,ENSG00000176928,ENSG00000184785,ENSG00000133636,ENSG00000119888,ENSG00000136997,ENSG00000136167,ENSG00000118523,ENSG00000105825,ENSG00000066056,ENSG00000101255,ENSG00000118785,ENSG00000155307,ENSG00000260802,ENSG00000114200,ENSG00000115963	1
TF	TF:M04084	Factor: POU3F4; motif: TGCATAAWTTA	1166	13	ENSG00000102290,ENSG00000175899,ENSG00000183389,ENSG00000285723,ENSG00000185862,ENSG00000197580,ENSG00000138271,ENSG00000169777,ENSG00000141338,ENSG00000113100,ENSG00000109163,ENSG00000116106,ENSG00000166407	0.0241279	1	ENSG00000184785	1
GO:CC	GO:0031226	intrinsic component of plasma membrane	1626	14	ENSG00000102290,ENSG00000183389,ENSG00000185862,ENSG00000213199,ENSG00000163534,ENSG00000168263,ENSG00000160654,ENSG00000104894,ENSG00000253159,ENSG00000179915,ENSG00000109163,ENSG00000063127,ENSG00000116106,ENSG00000069493	0.0256489	4	ENSG00000117600,ENSG00000105974,ENSG00000066056,ENSG00000171867	1
TF	TF:M01883_1	Factor: IRF-4; motif: GAAARTA; match class: 1	2947	21	ENSG00000212124,ENSG00000066405,ENSG00000285723,ENSG00000185862,ENSG00000127863,ENSG00000129151,ENSG00000138271,ENSG00000137270,ENSG00000152463,ENSG00000141338,ENSG00000113100,ENSG00000253159,ENSG00000141316,ENSG00000163072,ENSG00000109163,ENSG00000101440,ENSG00000063127,ENSG00000175564,ENSG00000248905,ENSG00000141449,ENSG00000069493	0.0295677	8	ENSG00000133636,ENSG00000204262,ENSG00000118785,ENSG00000155307,ENSG00000260802,ENSG00000169116,ENSG00000114200,ENSG00000115963	1
GO:CC	GO:0031224	intrinsic component of membrane	2588	18	ENSG00000212124,ENSG00000102290,ENSG00000183389,ENSG00000185862,ENSG00000127863,ENSG00000213199,ENSG00000169777,ENSG00000163534,ENSG00000168263,ENSG00000160654,ENSG00000104894,ENSG00000253159,ENSG00000179915,ENSG00000109163,ENSG00000063127,ENSG00000151062,ENSG00000116106,ENSG00000069493	0.0321898	6	ENSG00000168003,ENSG00000103257,ENSG00000117600,ENSG00000105974,ENSG00000066056,ENSG00000171867	1
TF	TF:M10036	Factor: Oct3; motif: CYWTTSWNATGCAAAT	4307	26	ENSG00000212124,ENSG00000102290,ENSG00000086570,ENSG00000183389,ENSG00000185862,ENSG00000127863,ENSG00000165383,ENSG00000213199,ENSG00000129151,ENSG00000197580,ENSG00000145920,ENSG00000169777,ENSG00000152463,ENSG00000163534,ENSG00000111215,ENSG00000229894,ENSG00000141338,ENSG00000104894,ENSG00000113100,ENSG00000163072,ENSG00000109163,ENSG00000151062,ENSG00000248905,ENSG00000116106,ENSG00000141449…	0.0322369	8	ENSG00000069482,ENSG00000276903,ENSG00000105974,ENSG00000136167,ENSG00000154734,ENSG00000095739,ENSG00000169116,ENSG00000114200	1
HPA	HPA:0410000	retina	111	4	ENSG00000197580,ENSG00000168263,ENSG00000120500,ENSG00000248905	0.0431261	1	ENSG00000130830	1
GO:BP	GO:0009653	anatomical structure morphogenesis	1862	4	ENSG00000137270,ENSG00000113100,ENSG00000179915,ENSG00000116106	1	16	ENSG00000143632,ENSG00000204262,ENSG00000142871,ENSG00000136997,ENSG00000117600,ENSG00000105974,ENSG00000114019,ENSG00000165617,ENSG00000128165,ENSG00000249751,ENSG00000066056,ENSG00000154734,ENSG00000095739,ENSG00000159176,ENSG00000129654,ENSG00000115963	0.0132909
GO:BP	GO:0009888	tissue development	1212	2	ENSG00000116106,ENSG00000187553	1	13	ENSG00000069482,ENSG00000143632,ENSG00000204262,ENSG00000142871,ENSG00000136997,ENSG00000105974,ENSG00000165617,ENSG00000118523,ENSG00000066056,ENSG00000095739,ENSG00000159176,ENSG00000129654,ENSG00000118785	0.0120381
GO:BP	GO:0044093	positive regulation of molecular function	1300	2	ENSG00000179915,ENSG00000116106	1	13	ENSG00000069482,ENSG00000133636,ENSG00000130988,ENSG00000142871,ENSG00000136997,ENSG00000105974,ENSG00000165617,ENSG00000066056,ENSG00000101255,ENSG00000095739,ENSG00000129654,ENSG00000171867,ENSG00000169116	0.0257183
GO:BP	GO:0050793	regulation of developmental process	1731	5	ENSG00000185862,ENSG00000137270,ENSG00000179915,ENSG00000116106,ENSG00000169554	1	16	ENSG00000069482,ENSG00000204262,ENSG00000142871,ENSG00000136997,ENSG00000105974,ENSG00000165617,ENSG00000128165,ENSG00000118523,ENSG00000249751,ENSG00000066056,ENSG00000154734,ENSG00000101255,ENSG00000095739,ENSG00000273542,ENSG00000129654,ENSG00000115963	0.00512639
GO:BP	GO:0051093	negative regulation of developmental process	587	1	ENSG00000116106	1	9	ENSG00000204262,ENSG00000136997,ENSG00000105974,ENSG00000249751,ENSG00000154734,ENSG00000101255,ENSG00000095739,ENSG00000273542,ENSG00000129654	0.0259535
GO:BP	GO:0035295	tube development	613	1	ENSG00000179915	1	9	ENSG00000136997,ENSG00000105974,ENSG00000114019,ENSG00000165617,ENSG00000128165,ENSG00000249751,ENSG00000066056,ENSG00000154734,ENSG00000129654	0.0365982
GO:CC	GO:1990184	amino acid transport complex	2				2	ENSG00000168003,ENSG00000103257	0.0018039
GO:BP	GO:0015823	phenylalanine transport	2				2	ENSG00000168003,ENSG00000103257	0.0106877
REAC	REAC:R-HSA-210991	Basigin interactions	25				3	ENSG00000168003,ENSG00000103257,ENSG00000105974	0.0218934
GO:BP	GO:0032092	positive regulation of protein binding	62				4	ENSG00000105974,ENSG00000165617,ENSG00000101255,ENSG00000095739	0.0320889
GO:MF	GO:0015190	L-leucine transmembrane transporter activity	5				2	ENSG00000168003,ENSG00000103257	0.0333808
WP	WP:WP3953	mRNA, protein, and metabolite inducation pathway by cyclosporin A	7				2	ENSG00000168003,ENSG00000103257	0.0375807
