# Supplementary material for: Computationally defined and in vitro validated putative genomic safe harbour loci for transgene expression in human cells
Source: eLife. 2024 Jan 2;13:e79592. doi: 10.7554/eLife.79592 (PMC10836832; doi:10.7554/eLife.79592)
Supplement: Supplementary file 6. — (1) Differentially expressed genes |logFC|≥1 and FDR ≤0.01. (2) Functional enrichment analysis results from g:GOSt. [file elife-79592-supp6.xlsx]

## Sheet: Key
	Supplementary File 6-1: Differentially expressed genes |logFC|≥1 and FDR≤0.01
	Supplementary File 6-2: Functional enrichment analysis results from g:GOSt			= term including to CASP9 (ENSG00000132906)

## Sheet: Pansio-1 (113339961-113340514)
ensembl_gene_id_version	Pansio_DEseq_LFC	Pansio_DEseq_P	Pansio_DEseq_FDR	external_gene_name	chromosome_name	start_position	end_position	shared_with_WT_H9	shared_with_olonne	shared_with_keppel
ENSG00000134077.16	-2.41578	1.96471e-73	5.70511e-69	THUMPD3	3	9362971	9386791	FALSE	FALSE	TRUE
ENSG00000106153.13	-4.70513	5.92048e-51	8.59595e-47	CHCHD2	7	56101573	56106476	FALSE	FALSE	FALSE
ENSG00000227124.11	1.6409	8.11919e-30	7.85884e-26	ZNF717	3	75678660	75785583	FALSE	FALSE	TRUE
ENSG00000131849.13	-2.1245	9.68224e-26	7.02882e-22	ZNF132	19	58432814	58440153	FALSE	TRUE	FALSE
ENSG00000132906.18	2.16345	1.54368e-24	8.96508e-21	CASP9	1	15490832	15526534	FALSE	TRUE	TRUE
ENSG00000213115.2	-9.07879	7.52922e-21	3.64389e-17		2	188227189	188228382	FALSE	TRUE	TRUE
ENSG00000236956.2	2.94523	1.30771e-20	5.42474e-17	NF1P8	2	131189834	131198007	FALSE	TRUE	TRUE
ENSG00000201185.1	-24.3493	2.7265e-20	9.8965e-17	RNA5SP202	6	4427963	4428081	FALSE	FALSE	FALSE
ENSG00000095261.14	1.04916	8.28659e-20	2.67362e-16	PSMD5	9	120815496	120842951	FALSE	FALSE	FALSE
ENSG00000180543.5	-4.27686	1.73776e-19	5.04612e-16	TSPYL5	8	97273488	97277928	FALSE	TRUE	TRUE
ENSG00000140403.13	-2.19952	4.82638e-17	1.27408e-13	DNAJA4	15	78264086	78282196	FALSE	FALSE	TRUE
ENSG00000182768.9	1.32661	6.76142e-17	1.63615e-13	NGRN	15	90265659	90275778	FALSE	FALSE	FALSE
ENSG00000236555.1	-22.5587	1.136e-16	2.53747e-13		2	112346011	112346258	FALSE	FALSE	FALSE
ENSG00000250420.8	-1.88683	4.55224e-16	9.44201e-13	AACSP1	5	178764861	178818435	FALSE	FALSE	FALSE
ENSG00000204118.2	-2.07939	1.19758e-15	2.31836e-12	NAP1L6P	X	73126037	73128080	FALSE	TRUE	TRUE
ENSG00000224104.1	-21.5748	6.35706e-15	1.15373e-11		7	153144313	153144588	FALSE	FALSE	FALSE
ENSG00000275834.1	20.7114	5.26799e-13	8.99834e-10		7	96306810	96306874	TRUE	TRUE	TRUE
ENSG00000271018.1	-22.6162	6.68327e-13	1.07816e-09		12	50756892	50757433	FALSE	FALSE	FALSE
ENSG00000243705.1	-22.6159	1.16156e-12	1.77523e-09		16	87268185	87268337	FALSE	FALSE	FALSE
ENSG00000226752.10	1.01967	2.63604e-11	3.64501e-08	CUTALP	9	120824828	120854385	FALSE	FALSE	FALSE
ENSG00000243970.5	-1.49386	4.08693e-11	5.39437e-08	PPIEL	1	39522280	39559698	FALSE	FALSE	FALSE
ENSG00000236860.1	-23.4717	2.12363e-10	2.68113e-07	RPL39P29	13	102263046	102263202	FALSE	FALSE	FALSE
ENSG00000115828.17	2.92482	3.32234e-10	4.01975e-07	QPCT	2	37342827	37373322	FALSE	FALSE	FALSE
ENSG00000270664.1	19.8587	4.04209e-10	4.69497e-07		2	202995194	202995403	TRUE	TRUE	TRUE
ENSG00000275609.1	-21.2746	1.3488e-09	1.5064e-06		22	23610329	23610538	FALSE	FALSE	FALSE
ENSG00000227875.2	19.3012	3.3598e-09	3.48435e-06	RPL23AP89	1	12080293	12080547	TRUE	TRUE	FALSE
ENSG00000100101.15	-21.7038	1.35519e-08	1.35697e-05		22	37686414	37726503	FALSE	FALSE	FALSE
ENSG00000270011.8	-1.3613	2.11547e-08	2.04764e-05	ZNF559-ZNF177	19	9324174	9382617	FALSE	FALSE	TRUE
ENSG00000223918.1	18.5383	3.66155e-08	3.32262e-05		9	110727456	110727679	TRUE	TRUE	TRUE
ENSG00000267323.1	-1.32168	5.0715e-08	4.46262e-05	SLC25A1P5	19	27805423	27806205	FALSE	FALSE	FALSE
ENSG00000160282.15	-2.24769	6.35839e-08	5.43044e-05	FTCD	21	46136160	46155579	FALSE	FALSE	FALSE
ENSG00000244267.1	-21.4669	7.29237e-08	6.05017e-05	RPL34P22	11	44629357	44629674	FALSE	FALSE	FALSE
ENSG00000204434.6	-5.10574	8.13531e-08	6.56203e-05	POTEKP	2	131591752	131628147	FALSE	TRUE	FALSE
ENSG00000134463.15	-1.28059	1.41725e-07	0.000105523	ECHDC3	10	11742366	11764070	FALSE	FALSE	FALSE
ENSG00000198865.10	1.07231	1.57972e-07	0.000114679	CCDC152	5	42756818	42802439	FALSE	TRUE	FALSE
ENSG00000274334.1	20.2988	1.97932e-07	0.000140184	VASN	CHR_HSCHR16_3_CTG1	4373807	4385487	FALSE	TRUE	TRUE
ENSG00000134248.14	1.02067	7.6281e-07	0.00050342	LAMTOR5	1	110401249	110407942	FALSE	FALSE	FALSE
ENSG00000188219.16	1.77233	9.00781e-07	0.000568628	POTEE	2	131209536	131265278	FALSE	FALSE	FALSE
ENSG00000258978.1	-23.0567	8.81413e-07	0.000568628	HIF1AP1	14	75116426	75116600	FALSE	FALSE	FALSE
ENSG00000256917.1	19.9112	1.35472e-06	0.000836987		12	68487687	68487863	TRUE	TRUE	TRUE
ENSG00000224664.2	-1.93505	1.47434e-06	0.000891916	RPL36AP53	X	114589620	114589935	FALSE	FALSE	TRUE
ENSG00000237846.1	-1.40329	1.7295e-06	0.00102492		9	40105822	40106527	FALSE	FALSE	FALSE
ENSG00000259299.1	-5.93845	2.00195e-06	0.00116265		15	29233673	29235137	FALSE	FALSE	FALSE
ENSG00000230450.1	2.7163	2.57608e-06	0.00143855	NEK2P4	2	131177618	131178946	FALSE	TRUE	TRUE
ENSG00000226260.9	-6.66534	4.00314e-06	0.00211351	HLA-DRA	CHR_HSCHR6_MHC_MANN_CTG1	32478466	32483677	FALSE	FALSE	FALSE
ENSG00000127399.15	-1.59781	4.65322e-06	0.00237053	LRRC61	7	150323263	150338156	FALSE	FALSE	TRUE
ENSG00000222500.1	18.2388	4.99827e-06	0.00250241	RNA5SP475	20	15280764	15280873	TRUE	TRUE	FALSE
ENSG00000276143.1	-4.70906	5.20711e-06	0.00256278		CHR_HSCHR15_1_CTG8	28402766	28404923	FALSE	FALSE	FALSE
ENSG00000149633.12	-2.87848	5.35415e-06	0.00259123	KIAA1755	20	38210503	38260772	FALSE	FALSE	FALSE
ENSG00000178081.12	-2.14493	6.07034e-06	0.00279795	ULK4P3	15	30103720	30131757	FALSE	FALSE	FALSE
ENSG00000282509.1	-2.14493	6.07034e-06	0.00279795	ULK4P3	CHR_HSCHR15_6_CTG8	30103719	30131750	FALSE	FALSE	FALSE
ENSG00000284636.1	-21.5435	6.0283e-06	0.00279795		4	9000841	9001058	FALSE	FALSE	FALSE
ENSG00000118231.5	-3.90702	7.18307e-06	0.00320895	CRYGD	2	208121607	208124524	FALSE	FALSE	FALSE
ENSG00000285434.2	-3.90702	7.18307e-06	0.00320895	CRYGD	CHR_HSCHR2_8_CTG7_2	208127748	208130665	FALSE	FALSE	FALSE
ENSG00000201356.1	20.2513	1.29617e-05	0.00570276	RNA5SP500	X	28982852	28982970	FALSE	FALSE	FALSE
ENSG00000239865.6	6.89297	1.34106e-05	0.0058122	RPP21	CHR_HSCHR6_MHC_MANN_CTG1	30373944	30391525	FALSE	FALSE	FALSE
ENSG00000282183.1	-1.30551	1.41302e-05	0.006034	GOLGA2P10	CHR_HSCHR15_5_CTG8	82552056	82593266	FALSE	FALSE	FALSE
ENSG00000120729.10	-3.58554	1.69251e-05	0.00702101	MYOT	5	137867858	137887851	FALSE	FALSE	FALSE
ENSG00000231122.5	17.6321	1.75167e-05	0.00706457	FAM25E	10	45815428	45817324	TRUE	FALSE	FALSE
ENSG00000267148.1	-21.3257	2.48835e-05	0.00963424		19	3775996	3776182	FALSE	FALSE	FALSE

## Sheet: Olônne-18 (56534775-56536439)
ensembl_gene_id_version	Olonne_DEseq_LFC	Olonne_DEseq_P	Olonne_DEseq_FDR	external_gene_name	chromosome_name	start_position	end_position	shared_with_WT_H9	shared_with_pansio	shared_with_olonne
ENSG00000131849.13	-2.05225	1.12037e-28	3.11529e-24	ZNF132	19	58432814	58440153	FALSE	TRUE	FALSE
ENSG00000213115.2	-4.52948	8.0706e-28	1.12206e-23		2	188227189	188228382	FALSE	TRUE	TRUE
ENSG00000180543.5	-4.93794	3.61703e-25	3.3525e-21	TSPYL5	8	97273488	97277928	FALSE	TRUE	TRUE
ENSG00000223696.1	-23.3003	7.86489e-23	4.37382e-19	HLA-DPA3	CHR_HSCHR6_MHC_DBB_CTG1	33109121	33121230	FALSE	FALSE	FALSE
ENSG00000237398.1	-23.3003	7.86489e-23	4.37382e-19	HLA-DPA3	6	33131216	33143325	FALSE	FALSE	FALSE
ENSG00000132906.18	1.87826	1.95305e-20	9.0511e-17	CASP9	1	15490832	15526534	FALSE	TRUE	TRUE
ENSG00000250813.1	-24.5544	5.20181e-19	2.06631e-15	SERF1AP1	4	137301001	137301187	FALSE	FALSE	FALSE
ENSG00000197238.5	17.8314	5.97318e-19	2.07613e-15	H4C11	6	27824092	27824480	TRUE	FALSE	TRUE
ENSG00000236956.2	-5.59601	2.74946e-17	8.49462e-14	NF1P8	2	131189834	131198007	FALSE	TRUE	TRUE
ENSG00000283269.1	-2.44427	1.03908e-14	2.88926e-11		19	28683071	28727777	FALSE	FALSE	TRUE
ENSG00000133488.15	-1.48778	1.94455e-14	4.91546e-11	SEC14L4	22	30488902	30505711	FALSE	FALSE	FALSE
ENSG00000204434.6	-6.94578	1.79662e-13	3.84282e-10	POTEKP	2	131591752	131628147	FALSE	TRUE	FALSE
ENSG00000275834.1	18.6093	1.60701e-11	2.97897e-08		7	96306810	96306874	TRUE	TRUE	TRUE
ENSG00000270664.1	20.5214	1.75859e-11	3.0562e-08		2	202995194	202995403	TRUE	TRUE	TRUE
ENSG00000204118.2	-1.44585	7.34695e-11	1.13494e-07	NAP1L6P	X	73126037	73128080	FALSE	TRUE	TRUE
ENSG00000230450.1	-5.21968	1.01333e-09	1.40883e-06	NEK2P4	2	131177618	131178946	FALSE	TRUE	TRUE
ENSG00000227875.2	17.9399	1.09405e-08	1.38278e-05	RPL23AP89	1	12080293	12080547	TRUE	TRUE	FALSE
ENSG00000271357.1	18.9949	1.27822e-08	1.54531e-05		12	32100485	32100735	TRUE	FALSE	FALSE
ENSG00000232879.2	-22.361	1.67996e-08	1.94638e-05	GLRX5P2	1	161034834	161035006	FALSE	FALSE	FALSE
ENSG00000198865.10	1.0959	2.17602e-08	2.42025e-05	CCDC152	5	42756818	42802439	FALSE	TRUE	FALSE
ENSG00000237175.1	-4.10382	4.96397e-08	5.30877e-05	NME1P1	13	22099163	22099544	FALSE	FALSE	TRUE
ENSG00000119125.17	-1.0112	5.36221e-08	5.52228e-05	GDA	9	72114595	72257193	FALSE	FALSE	FALSE
ENSG00000161652.13	-1.11904	6.65251e-08	6.60642e-05	IZUMO2	19	50152548	50163281	FALSE	FALSE	TRUE
ENSG00000223918.1	17.3603	8.17437e-08	7.43395e-05		9	110727456	110727679	TRUE	TRUE	TRUE
ENSG00000271618.1	-22.7183	7.8629e-08	7.43395e-05		1	71738173	71738354	FALSE	FALSE	FALSE
ENSG00000274334.1	20.08	8.28787e-08	7.43395e-05	VASN	CHR_HSCHR16_3_CTG1	4373807	4385487	FALSE	TRUE	TRUE
ENSG00000277883.1	-1.26974	3.83686e-07	0.0003334	NLRP3P1	X	107974078	107985008	FALSE	FALSE	TRUE
ENSG00000235363.1	17.0985	3.99793e-07	0.000336868	SNRPGP10	1	205351247	205351471	TRUE	FALSE	TRUE
ENSG00000101844.18	1.42504	5.45568e-07	0.000446179	ATG4A	X	108091668	108154671	FALSE	FALSE	FALSE
ENSG00000277529.1	-5.87319	7.00736e-07	0.000541241	NF1P10	14	18709478	18712643	FALSE	FALSE	TRUE
ENSG00000256917.1	19.5612	7.55159e-07	0.000560208		12	68487687	68487863	TRUE	TRUE	TRUE
ENSG00000255622.3	-1.5556	1.21908e-06	0.000869172	PCDHB17P	5	141155996	141159061	FALSE	FALSE	TRUE
ENSG00000257800.1	1.07104	1.72505e-06	0.00114207	FNBP1P1	2	74120680	74123218	FALSE	FALSE	TRUE
ENSG00000227586.5	-1.42203	2.67615e-06	0.00169121	RPS26P39	10	123171535	123171875	FALSE	FALSE	FALSE
ENSG00000217181.1	-1.23428	2.85176e-06	0.00172383		6	10574749	10575227	FALSE	FALSE	FALSE
ENSG00000285209.1	-1.23428	2.85176e-06	0.00172383		CHR_HG2057_PATCH	10574749	10575227	FALSE	FALSE	FALSE
ENSG00000234421.2	-5.46612	2.94075e-06	0.0017398	SLC25A5P4	13	57314739	57315909	FALSE	FALSE	FALSE
ENSG00000215568.9	-3.35457	3.10908e-06	0.00176431	GAB4	22	16961936	17008222	FALSE	FALSE	FALSE
ENSG00000248796.1	-5.35588	3.77866e-06	0.00210139	MED15P8	2	131201142	131202941	FALSE	FALSE	TRUE
ENSG00000233870.1	-23.5771	5.15673e-06	0.00275746		2	71178587	71178773	FALSE	FALSE	FALSE
ENSG00000235299.2	-1.33176	6.05689e-06	0.00313608	MRPL53P1	1	112625906	112626224	FALSE	FALSE	FALSE
ENSG00000170439.8	1.02286	7.64517e-06	0.00386512	METTL7B	12	55681736	55684611	FALSE	FALSE	FALSE
ENSG00000212373.1	17.9683	9.28219e-06	0.00460894	RNA5SP171	4	166918364	166918478	FALSE	FALSE	FALSE
ENSG00000222500.1	16.9044	1.06402e-05	0.00510105	RNA5SP475	20	15280764	15280873	TRUE	TRUE	FALSE
ENSG00000267713.1	7.19387	1.3269e-05	0.0061493		18	50669510	50670215	FALSE	FALSE	FALSE
ENSG00000156253.7	-1.08316	1.64316e-05	0.00736932	RWDD2B	21	29004384	29019360	FALSE	FALSE	FALSE
ENSG00000259160.1	18.528	1.91795e-05	0.00795977		14	64535702	64535879	TRUE	FALSE	TRUE
ENSG00000145920.15	-1.50986	1.96716e-05	0.00804396	CPLX2	5	175796310	175884021	FALSE	FALSE	FALSE
ENSG00000126500.4	-1.20271	2.37559e-05	0.00940066	FLRT1	11	64035931	64119173	FALSE	FALSE	TRUE
ENSG00000147647.13	-3.58743	2.53803e-05	0.00973134	DPYS	8	104330324	104467055	FALSE	FALSE	TRUE
ENSG00000253304.2	1.20781	2.6663e-05	0.00988523	TMEM200B	1	29119429	29123903	FALSE	FALSE	FALSE

## Sheet: Keppel-19 (5400761-5402139)
ensembl_gene_id_version	Keppel_DEseq_LFC	Keppel_DEseq_P	Keppel_DEseq_FDR	external_gene_name	chromosome_name	start_position	end_position	shared_with_WT_H9	shared_with_pansio	shared_with_olonne
ENSG00000134077.16	-2.43912	3.25226e-82	6.88244e-78	THUMPD3	3	9362971	9386791	FALSE	TRUE	FALSE
ENSG00000276578.1	-3.32471	7.66805e-44	8.11356e-40		19	56485923	56494280	FALSE	FALSE	FALSE
ENSG00000227124.11	1.89088	1.93425e-42	1.36442e-38	ZNF717	3	75678660	75785583	FALSE	TRUE	FALSE
ENSG00000109381.21	-1.04565	3.00607e-31	1.59036e-27	ELF2	4	139028112	139177218	FALSE	FALSE	FALSE
ENSG00000235729.1	-9.59316	2.95533e-25	1.25081e-21		X	143806391	143806733	FALSE	FALSE	FALSE
ENSG00000180543.5	-6.62023	1.01424e-23	3.57723e-20	TSPYL5	8	97273488	97277928	FALSE	TRUE	TRUE
ENSG00000213115.2	-6.98869	1.96472e-22	5.19717e-19		2	188227189	188228382	FALSE	TRUE	TRUE
ENSG00000184515.11	-3.20207	5.05299e-21	1.18813e-17	BEX5	X	102153708	102155977	FALSE	FALSE	FALSE
ENSG00000197238.5	18.0014	2.73232e-19	5.78213e-16	H4C11	6	27824092	27824480	TRUE	FALSE	TRUE
ENSG00000198046.13	-1.09471	1.17061e-17	2.25205e-14	ZNF667	19	56439325	56478065	FALSE	FALSE	FALSE
ENSG00000236956.2	-7.49332	2.75486e-17	4.8582e-14	NF1P8	2	131189834	131198007	FALSE	TRUE	TRUE
ENSG00000132906.18	1.71299	2.98714e-17	4.8626e-14	CASP9	1	15490832	15526534	FALSE	TRUE	TRUE
ENSG00000140403.13	-2.07509	3.40343e-17	5.14453e-14	DNAJA4	15	78264086	78282196	FALSE	TRUE	FALSE
ENSG00000283269.1	-2.58119	3.85895e-16	5.4442e-13		19	28683071	28727777	FALSE	FALSE	TRUE
ENSG00000254535.4	-6.84987	1.27957e-15	1.69239e-12	PABPC4L	4	134196333	134201789	FALSE	FALSE	FALSE
ENSG00000250830.1	-22.5301	2.083e-15	2.59297e-12	MRPS35P2	5	98402542	98402732	FALSE	FALSE	FALSE
ENSG00000141096.6	-3.90676	3.21441e-15	3.58017e-12	DPEP3	16	67975663	67980549	FALSE	FALSE	FALSE
ENSG00000188321.14	-1.07246	3.05102e-15	3.58017e-12	ZNF559	19	9323772	9351162	FALSE	FALSE	FALSE
ENSG00000204118.2	-1.80521	9.40029e-15	9.4728e-12	NAP1L6P	X	73126037	73128080	FALSE	TRUE	TRUE
ENSG00000270011.8	-1.75387	5.56098e-14	5.34916e-11	ZNF559-ZNF177	19	9324174	9382617	FALSE	TRUE	FALSE
ENSG00000230450.1	-7.30395	2.70152e-13	2.19883e-10	NEK2P4	2	131177618	131178946	FALSE	TRUE	TRUE
ENSG00000269237.1	-1.29673	1.24749e-12	9.77758e-10		19	21405159	21491266	FALSE	FALSE	FALSE
ENSG00000275834.1	19.3001	2.73713e-12	2.06868e-09		7	96306810	96306874	TRUE	TRUE	TRUE
ENSG00000257800.1	-1.8623	2.40621e-11	1.75587e-08	FNBP1P1	2	74120680	74123218	FALSE	FALSE	TRUE
ENSG00000237175.1	-4.95193	1.14496e-10	7.5718e-08	NME1P1	13	22099163	22099544	FALSE	FALSE	TRUE
ENSG00000228981.3	-2.21437	1.43123e-10	9.17807e-08		4	143349275	143350117	FALSE	FALSE	FALSE
ENSG00000270664.1	19.0788	4.13001e-10	2.49712e-07		2	202995194	202995403	TRUE	TRUE	TRUE
ENSG00000151612.18	-1.37237	4.61993e-10	2.71575e-07	ZNF827	4	145757627	145938823	FALSE	FALSE	FALSE
ENSG00000228623.7	-1.01059	7.71066e-10	4.41008e-07	ZNF883	9	112957722	113012230	FALSE	FALSE	FALSE
ENSG00000277529.1	-7.24344	1.36875e-09	7.42707e-07	NF1P10	14	18709478	18712643	FALSE	FALSE	TRUE
ENSG00000254824.1	-22.5958	1.58808e-09	8.40173e-07		11	103409580	103409657	FALSE	FALSE	FALSE
ENSG00000276064.1	-9.08048	1.66724e-09	8.60542e-07		6	77343557	77343654	FALSE	FALSE	FALSE
ENSG00000106366.9	3.8304	2.53284e-09	1.24651e-06	SERPINE1	7	101127104	101139247	FALSE	FALSE	FALSE
ENSG00000248796.1	-7.42242	4.60463e-09	2.11833e-06	MED15P8	2	131201142	131202941	FALSE	FALSE	TRUE
ENSG00000253231.1	-20.6518	8.28971e-09	3.65473e-06	COX6CP8	8	64331927	64332152	FALSE	FALSE	FALSE
ENSG00000235363.1	19.3375	9.29365e-09	4.01372e-06	SNRPGP10	1	205351247	205351471	TRUE	FALSE	TRUE
ENSG00000147647.13	-5.69728	1.24776e-08	5.17749e-06	DPYS	8	104330324	104467055	FALSE	FALSE	TRUE
ENSG00000223918.1	18.0202	2.53822e-08	9.94701e-06		9	110727456	110727679	TRUE	TRUE	TRUE
ENSG00000175894.18	-1.73693	2.69747e-08	1.03789e-05	TSPEAR	21	44497893	44711572	FALSE	FALSE	FALSE
ENSG00000213406.3	-2.26158	3.80682e-08	1.38896e-05	ANXA2P1	4	153307792	153308717	FALSE	FALSE	FALSE
ENSG00000126500.4	-1.58306	5.7639e-08	1.9996e-05	FLRT1	11	64035931	64119173	FALSE	FALSE	TRUE
ENSG00000161652.13	-1.11049	8.71102e-08	2.97327e-05	IZUMO2	19	50152548	50163281	FALSE	FALSE	TRUE
ENSG00000255622.3	-1.72496	1.50457e-07	4.89843e-05	PCDHB17P	5	141155996	141159061	FALSE	FALSE	TRUE
ENSG00000183696.14	1.04493	2.16513e-07	6.9422e-05	UPP1	7	48088628	48108736	FALSE	FALSE	FALSE
ENSG00000164695.5	1.07981	3.0139e-07	9.51943e-05	CHMP4C	8	81732448	81759515	FALSE	FALSE	FALSE
ENSG00000136960.13	1.29623	3.19308e-07	9.93707e-05	ENPP2	8	119557086	119673453	FALSE	FALSE	FALSE
ENSG00000184470.21	1.44384	3.75328e-07	0.000113467	TXNRD2	22	19875517	19941820	FALSE	FALSE	FALSE
ENSG00000167613.16	-1.92044	3.94448e-07	0.000117568	LAIR1	19	54351384	54370558	FALSE	FALSE	FALSE
ENSG00000169594.14	2.11605	7.32575e-07	0.000206703	BNC1	15	83255884	83284664	FALSE	FALSE	FALSE
ENSG00000236878.1	-2.6307	8.43444e-07	0.000228833	MTATP6P26	2	120211054	120211715	FALSE	FALSE	FALSE
ENSG00000128564.8	3.18892	8.70219e-07	0.000233109	VGF	7	101162509	101165569	FALSE	FALSE	FALSE
ENSG00000284099.3	1.47986	1.00878e-06	0.000257202	SQSTM1	CHR_HG30_PATCH	179821758	179838931	FALSE	FALSE	FALSE
ENSG00000167644.12	-1.77519	1.94638e-06	0.000468059	C19orf33	19	38304164	38305006	FALSE	FALSE	FALSE
ENSG00000261593.1	-22.8433	2.11769e-06	0.000503534	CYP4A27P	1	47000898	47001087	FALSE	FALSE	FALSE
ENSG00000127399.15	-1.55184	2.44268e-06	0.000574356	LRRC61	7	150323263	150338156	FALSE	TRUE	FALSE
ENSG00000277015.4	-1.0606	2.54209e-06	0.00059116	SALL3	CHR_HSCHR18_ALT2_CTG2_1	78980275	79002677	FALSE	FALSE	FALSE
ENSG00000171291.9	-1.14862	3.75168e-06	0.00080195	ZNF439	19	11848726	11883750	FALSE	FALSE	FALSE
ENSG00000236717.2	-20.916	4.73156e-06	0.00097213		9	92150382	92157445	FALSE	FALSE	FALSE
ENSG00000260776.6	-1.72768	4.95573e-06	0.000998793	GOLGA6FP	15	77914217	77926846	FALSE	FALSE	FALSE
ENSG00000256917.1	17.926	5.89757e-06	0.0011556		12	68487687	68487863	TRUE	TRUE	TRUE
ENSG00000270614.1	-1.54738	7.34678e-06	0.00140065		19	9348106	9348703	FALSE	FALSE	FALSE
ENSG00000277883.1	-1.11662	7.52572e-06	0.00142196	NLRP3P1	X	107974078	107985008	FALSE	FALSE	TRUE
ENSG00000226118.1	-4.23529	7.61229e-06	0.00142559	MTND3P1	13	22113119	22113338	FALSE	FALSE	FALSE
ENSG00000259160.1	19.2338	9.07703e-06	0.00161419		14	64535702	64535879	TRUE	FALSE	TRUE
ENSG00000143248.13	1.07392	9.52304e-06	0.00166551	RGS5	1	163111121	163321791	FALSE	FALSE	FALSE
ENSG00000151623.15	-1.70069	1.10689e-05	0.00187392	NR3C2	4	148078762	148444698	FALSE	FALSE	FALSE
ENSG00000130827.6	-1.24915	1.58585e-05	0.00262186	PLXNA3	X	154458281	154477779	FALSE	FALSE	FALSE
ENSG00000118946.12	1.8564	1.76163e-05	0.00286767	PCDH17	13	57631744	57729311	FALSE	FALSE	FALSE
ENSG00000187492.9	-1.80169	1.78803e-05	0.00288843	CDHR4	3	49790732	49799873	FALSE	FALSE	FALSE
ENSG00000285713.1	-1.1099	1.80172e-05	0.00288849		4	144210701	145098174	FALSE	FALSE	FALSE
ENSG00000163735.7	1.59413	1.83023e-05	0.00291213	CXCL5	4	73995642	73998677	FALSE	FALSE	FALSE
ENSG00000232334.1	-1.61251	1.91413e-05	0.0030229		10	124004304	124004828	FALSE	FALSE	FALSE
ENSG00000004777.19	-1.0672	2.44341e-05	0.00366719	ARHGAP33	19	35774532	35788822	FALSE	FALSE	FALSE
ENSG00000171368.12	-1.00866	2.76974e-05	0.00407036	TPPP	5	659862	693352	FALSE	FALSE	FALSE
ENSG00000135046.14	3.02659	3.13004e-05	0.00447553	ANXA1	9	73151865	73170393	FALSE	FALSE	FALSE
ENSG00000102195.10	1.34424	3.24598e-05	0.00461017	GPR50	X	151176584	151181465	FALSE	FALSE	FALSE
ENSG00000225448.1	-8.54652	3.93319e-05	0.00504449		2	131181153	131181369	FALSE	FALSE	FALSE
ENSG00000240280.7	-1.80931	4.27692e-05	0.00538739	TCAM1P	17	63849292	63864379	FALSE	FALSE	FALSE
ENSG00000113209.9	-1.01492	5.07831e-05	0.00607159	PCDHB5	5	141135206	141138615	FALSE	FALSE	FALSE
ENSG00000260371.1	1.31604	6.40786e-05	0.00732901		16	69335091	69356306	FALSE	FALSE	FALSE
ENSG00000243749.2	1.01292	6.95391e-05	0.00774519	TMEM35B	1	34981380	34985347	FALSE	FALSE	FALSE
ENSG00000122861.16	1.22003	8.76251e-05	0.00854526	PLAU	10	73909177	73917496	FALSE	FALSE	FALSE
ENSG00000184672.12	-1.89065	9.11299e-05	0.0086869	RALYL	8	84182787	84921844	FALSE	FALSE	FALSE
ENSG00000284138.1	-1.27711	9.05805e-05	0.0086869	ATP6V0CP4	1	42952202	42952641	FALSE	FALSE	FALSE
ENSG00000180787.6	-1.20107	9.2644e-05	0.00878016	ZFP3	17	5078467	5096374	FALSE	FALSE	FALSE
ENSG00000248863.2	-1.24209	9.64841e-05	0.0089947		4	139426299	139430884	FALSE	FALSE	FALSE
ENSG00000274334.1	14.7	0.000102621	0.00926412	VASN	CHR_HSCHR16_3_CTG1	4373807	4385487	FALSE	TRUE	TRUE
ENSG00000105974.13	1.65698	0.000105112	0.00938554	CAV1	7	116524994	116561179	FALSE	FALSE	FALSE
ENSG00000249751.4	1.28799	0.000112332	0.00978261	ECSCR	5	139448560	139462743	FALSE	FALSE	FALSE
ENSG00000288297.1	1.28799	0.000112332	0.00978261	ECSCR	CHR_HG1395_PATCH	139448560	139462009	FALSE	FALSE	FALSE
ENSG00000224664.2	-1.47928	0.000114783	0.00991446	RPL36AP53	X	114589620	114589935	FALSE	TRUE	FALSE

## Sheet: WT H9
ensembl_gene_id_version	H9wt_DEseq_LFC	H9wt_DEseq_P	H9wt_DEseq_FDR	external_gene_name	chromosome_name	start_position	end_position
ENSG00000105967.16	-22.8185	1.56202e-21	5.47097e-17	TFEC	7	115935148	116159896
ENSG00000197238.5	16.8566	7.2259e-18	1.26544e-13	H4C11	6	27824092	27824480
ENSG00000275834.1	19.2809	6.23844e-13	7.28338e-09		7	96306810	96306874
ENSG00000270664.1	19.0745	1.18434e-10	1.03704e-06		2	202995194	202995403
ENSG00000227875.2	19.3422	2.01668e-10	1.41269e-06	RPL23AP89	1	12080293	12080547
ENSG00000223918.1	18.4297	4.15961e-09	2.42817e-05		9	110727456	110727679
ENSG00000276650.1	-21.5548	1.90266e-08	9.52012e-05		7	64425623	64426334
ENSG00000235363.1	17.2756	1.25862e-07	0.000551042	SNRPGP10	1	205351247	205351471
ENSG00000222500.1	19.2156	2.27491e-07	0.000885318	RNA5SP475	20	15280764	15280873
ENSG00000256917.1	19.7379	2.57144e-07	0.000900649		12	68487687	68487863
ENSG00000271357.1	16.4289	4.0886e-07	0.00130185		12	32100485	32100735
ENSG00000231122.5	18.4873	1.24728e-06	0.0036405	FAM25E	10	45815428	45817324
ENSG00000224279.2	-24.0563	1.51066e-06	0.00377935	RPS29P31	22	38574931	38575431
ENSG00000259160.1	20.1933	1.4929e-06	0.00377935		14	64535702	64535879
ENSG00000258677.2	-3.99674	1.65797e-06	0.00387136		8	73688691	73878854

## Sheet: Pansio-1
source	term_id	term_name	term_size	pansio_up_overlap	pansio_up_hits	pansio_up_padj	pansio_down_overlap	pansio_down_hits	pansio_down_padj	shared_with_WT_H9
REAC	REAC:R-HSA-1257604	PIP3 activates AKT signaling	252	3	ENSG00000095261,ENSG00000134248,ENSG00000132906	0.0223927				FALSE
REAC	REAC:R-HSA-9006925	Intracellular signaling by second messengers	292	3	ENSG00000095261,ENSG00000134248,ENSG00000132906	0.0346979				FALSE
GO:CC	GO:1905369	endopeptidase complex	73	2	ENSG00000095261,ENSG00000132906	0.0382763				FALSE
TF	TF:M09935_1	Factor: GABP-alpha; motif: NNNRCCGGAAGTGN; match class: 1	1069	1	ENSG00000182768	1	6	ENSG00000131849,ENSG00000127399,ENSG00000106153,ENSG00000270011,ENSG00000134077,ENSG00000100101	0.0465409	FALSE
TF	TF:M02068_1	Factor: etv3; motif: ACCGGAAGYN; match class: 1	623	1	ENSG00000182768	1	5	ENSG00000131849,ENSG00000127399,ENSG00000106153,ENSG00000270011,ENSG00000100101	0.0491645	FALSE
TF	TF:M03983_1	Factor: ETV5; motif: NCCGGAWGYN; match class: 1	540	1	ENSG00000182768	1	5	ENSG00000131849,ENSG00000127399,ENSG00000106153,ENSG00000270011,ENSG00000100101	0.0246821	FALSE

## Sheet: Olonne-18
source	term_id	term_name	term_size	olonne_up_overlap	olonne_up_hits	olonne_up_padj	olonne_down_overlap	olonne_down_hits	olonne_down_padj	shared_with_WT_H9
GO:MF	GO:0018708	thiol S-methyltransferase activity	1	1	ENSG00000170439	0.0499713				FALSE
REAC	REAC:R-HSA-8956319	Nucleotide catabolism	31				2	ENSG00000147647,ENSG00000119125	0.00430327	FALSE
GO:BP	GO:0009112	nucleobase metabolic process	21				2	ENSG00000147647,ENSG00000119125	0.0211989	FALSE
REAC	REAC:R-HSA-15869	Metabolism of nucleotides	92				2	ENSG00000147647,ENSG00000119125	0.0385921	FALSE
GO:MF	GO:0008892	guanine deaminase activity	1				1	ENSG00000119125	0.0498978	FALSE

## Sheet: Keppel-19
source	term_id	term_name	term_size	keppel_up_overlap	keppel_up_hits	keppel_up_padj	keppel_down_overlap	keppel_down_hits	keppel_down_padj	shared_with_WT_H9
GO:CC	GO:0097180	serine protease inhibitor complex	6	2	ENSG00000106366,ENSG00000122861	0.00252524				FALSE
GO:CC	GO:0097179	protease inhibitor complex	8	2	ENSG00000106366,ENSG00000122861	0.00470785				FALSE
GO:BP	GO:0061041	regulation of wound healing	106	4	ENSG00000105974,ENSG00000106366,ENSG00000122861,ENSG00000135046	0.00762619				FALSE
GO:CC	GO:1904090	peptidase inhibitor complex	11	2	ENSG00000106366,ENSG00000122861	0.0092301				FALSE
GO:BP	GO:2000097	regulation of smooth muscle cell-matrix adhesion	4	2	ENSG00000106366,ENSG00000122861	0.0106905				FALSE
GO:BP	GO:1903034	regulation of response to wounding	123	4	ENSG00000105974,ENSG00000106366,ENSG00000122861,ENSG00000135046	0.013773				FALSE
GO:BP	GO:0061302	smooth muscle cell-matrix adhesion	6	2	ENSG00000106366,ENSG00000122861	0.0266908				FALSE
GO:BP	GO:0014812	muscle cell migration	48	3	ENSG00000106366,ENSG00000122861,ENSG00000135046	0.0296826				FALSE
REAC	REAC:R-HSA-75205	Dissolution of Fibrin Clot	13	2	ENSG00000106366,ENSG00000122861	0.0325405				FALSE
GO:BP	GO:0042060	wound healing	326	5	ENSG00000164695,ENSG00000105974,ENSG00000106366,ENSG00000122861,ENSG00000135046	0.0342847				FALSE
HP	HP:0000140	Abnormality of the menstrual cycle	252	4	ENSG00000169594,ENSG00000105974,ENSG00000106366,ENSG00000122861	0.0407421				FALSE
GO:BP	GO:0030193	regulation of blood coagulation	54	3	ENSG00000105974,ENSG00000106366,ENSG00000122861	0.0423895				FALSE
GO:BP	GO:1900046	regulation of hemostasis	55	3	ENSG00000105974,ENSG00000106366,ENSG00000122861	0.0448037				FALSE
GO:BP	GO:0050818	regulation of coagulation	56	3	ENSG00000105974,ENSG00000106366,ENSG00000122861	0.0473067				FALSE
CORUM	CORUM:2462	Caveolin-1 homodimer complex	1	1	ENSG00000105974	0.0496775				FALSE
WP	WP:WP272	Blood clotting cascade	22	2	ENSG00000106366,ENSG00000122861	0.0498979				FALSE
KEGG	KEGG:05168	Herpes simplex virus 1 infection	477	2	ENSG00000227124,ENSG00000132906	1	4	ENSG00000198046,ENSG00000171291,ENSG00000188321,ENSG00000270011	0.0236318	FALSE
TF	TF:M12217	Factor: GLIS2; motif: ACCCCCCRCGWNGC	583				8	ENSG00000180543,ENSG00000127399,ENSG00000126500,ENSG00000175894,ENSG00000130827,ENSG00000109381,ENSG00000171368,ENSG00000151623	0.0025222	FALSE

## Sheet: WT_H9
source	term_id	term_name	term_size	H9_up_overlap	H9_up_hits	H9_up_padj	H9_down_overlap	H9_down_hits	H9_down_padj
