# Supplementary material for: Computationally defined and in vitro validated putative genomic safe harbour loci for transgene expression in human cells
Source: eLife. 2024 Jan 2;13:e79592. doi: 10.7554/eLife.79592 (PMC10836832; doi:10.7554/eLife.79592)
Supplement: Supplementary file 7. [file elife-79592-supp7.xlsx]

## Sheet: key
	Supplementary File 7: HCI data analysis source file for Figure 4 - Figure Supplement 1
		= isotype controls

## Sheet: neuronal
WellName	Neurite Segments Selected - Number of Objects	Nuclei Selected - Number of Objects	Nuclei_488 - Number of Objects	Neurite Segments - Branch Level - Mean per Well	clover / nuclei	Number of Analyzed Fields
B6	377755	81257	63615	1.08843	0.782886	61
B7	315001	56420	45085	1.26892	0.799096	61
B8	322167	49372	37887	1.4852	0.767378	61
C6	1166	86151	66969	1.896	0.777344	61
C7	1089	60482	47515	5.18159	0.785606	61
C8	1500	56427	43626	2.20596	0.773141	61
D6	129595	21680	18786	2.0457	0.866513	61
D7	97426	35406	30242	1.67577	0.854149	61
D8	138388	42681	33816	1.37454	0.792296	61
E6	2046	33725	29329	8.97042	0.869652	61
E7	4558	26431	22527	15.7109	0.852295	61
E8	3105	43075	34240	6.53607	0.794893	61
F6	77376	20820	17277	3.01894	0.829827	61
F7	68523	42087	36924	1.31818	0.877326	61
F8	64470	42563	35721	1.59269	0.83925	61
G6	2238	18373	14787	15.8767	0.804822	61
G7	2508	38719	33912	6.46155	0.875849	61
G8	2337	43096	35273	5.90867	0.818475	61
	Pansio-1	Olonne-18	Keppel-19
rep1	0.782886	0.799096	0.767378
rep2	0.866513	0.854149	0.792296
rep3	0.829827	0.877326	0.83925
mean	0.826409	0.843524	0.799641

## Sheet: liver 
WellName	Nuclei594 intensity filtered Selected - Number of Objects	Nuclei594 - Number of Objects	Nuclei - Number of Objects	488뷢594뷡抖힫秔麕 - Number of Objects	Transgene뷤媶	Number of Analyzed Fields
B2	1586	2050	8505	1568	0.950879	61
B3	2187	3120	16433	2150	0.957684	61
B4	1811	2060	8729	1753	0.950136	61
C2	63	1136	11842	53	0.815385	61
C3	27	1192	13701	17	0.62963	61
C4	13	870	13512	8	0.615385	61
D2	6902	7883	22556	6783	0.955487	61
D3	2302	3226	18413	2280	0.957179	61
D4	136	342	2752	129	0.921429	61
E2	118	1162	13140	99	0.798387	61
E3	124	1613	16376	107	0.823077	61
E4	12	58	2018	12	1	61
F2	5711	6747	19931	5618	0.959522	61
F3	2980	3944	16000	2934	0.950437	61
F4	5	15	150	5	1	61
G2	214	957	8636	188	0.854545	61
G3	131	2028	19106	123	0.91791	61
G4	76	1112	16973	63	0.818182	61
	Pansio-1	Olonne-18	Keppel-19
rep1	0.988651	0.983082	0.967973
rep2	0.982759	0.990443	0.948529
rep3	0.983716	0.984564	1
mean	0.985042	0.98603	0.972168

## Sheet: cardiac
WellName	Nuclei - Number of Objects	594+488 - Number of Objects	488Alone - Number of Objects	594+488 / (nuclei-488 alone)	Number of Analyzed Fields
B6	19628	16990	1688	0.947046	61
B7	16780	10102	2530	0.708912	61
B8	25519	15437	4891	0.748352	61
C6	18158	800	17034	0.711744	61
C7	17256	1062	15708	0.686047	61
C8	25366	1072	23816	0.691613	61
D6	18956	15019	2890	0.934831	61
D7	16573	11700	1840	0.794136	61
D8	26326	19028	2951	0.814032	61
E6	19210	955	18044	0.819039	61
E7	17036	2104	14530	0.839585	61
E8	25897	1299	24054	0.704829	61
F6	18608	16660	1286	0.961783	61
F7	17123	11153	2250	0.749882	61
F8	24603	17469	2792	0.800926	61
G6	18575	913	17293	0.712168	61
G7	16771	1050	15382	0.75594	61
G8	21528	1172	19941	0.7385	61
	Pansio-1	Olonne-18	Keppel-19
rep1	0.947046	0.708912	0.748352
rep2	0.934831	0.794136	0.814032
rep3	0.961783	0.749882	0.800926
mean	0.947887	0.750977	0.78777
