# Supplementary material for: Computationally defined and in vitro validated putative genomic safe harbour loci for transgene expression in human cells
Source: eLife. 2024 Jan 2;13:e79592. doi: 10.7554/eLife.79592 (PMC10836832; doi:10.7554/eLife.79592)
Supplement: Supplementary file 8. [file elife-79592-supp8.xlsx]

## Sheet: Sheet1
	Supplementary File 8: Percentage of FITC-A positive cells from H1 Pansio inducible cells source file for Figure 2 - Figure Supplement 6
		neg	dox (1mg/ml 24h)
	rep1	0	81.4
	rep2	0.166	84.4
	rep3	0	51.9
