# Supplementary figures and images for: Computationally defined and in vitro validated putative genomic safe harbour loci for transgene expression in human cells
Source: eLife journal article supplement (doi:10.7554/elife.79592), 2024-01-02

hESC

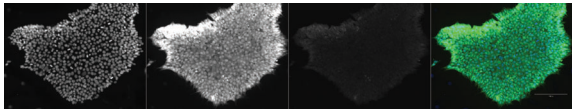

Neuronal

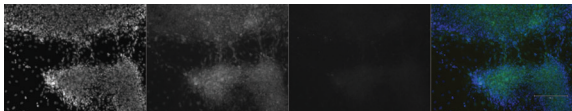

Liver

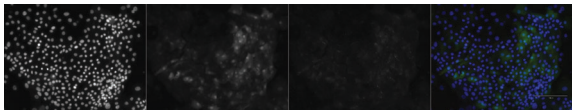

Cardiac

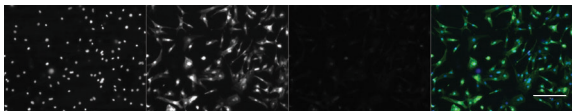

DAPI

Clover

AF594

Overlay

Supplement: supp [file elife-79592-supp-v1.zip]

Pansio-1

Olône-18

Keppel-19

H1

H9

HA 3': 511bp

HA 5': 406bp

WT: 592bp

HA 5': 872bp

HA 3': 879bp

WT: 903bp

HA 5': 446bp

HA 3': 842bp

WT: 704bp

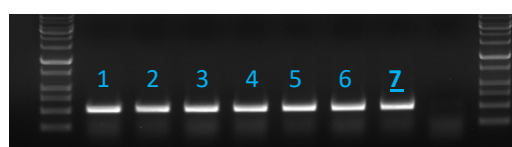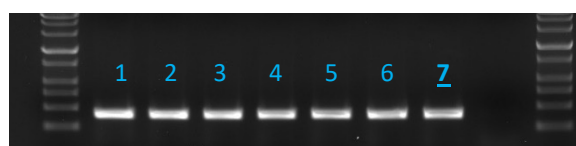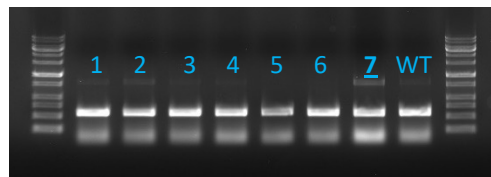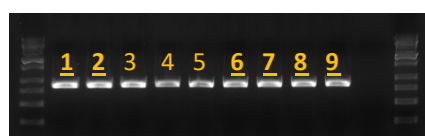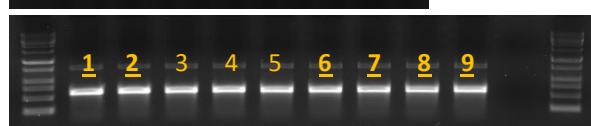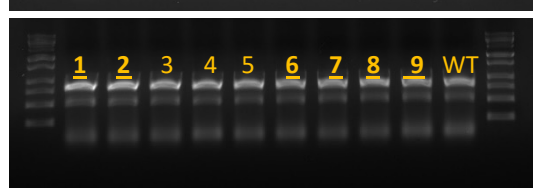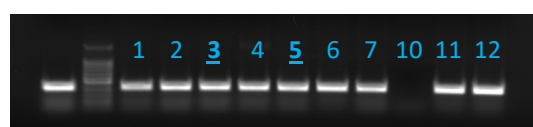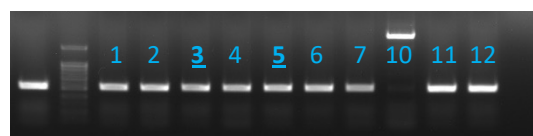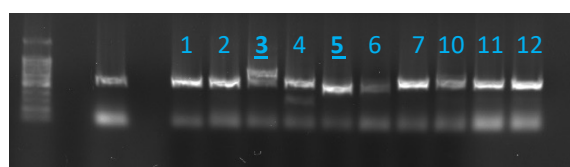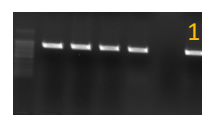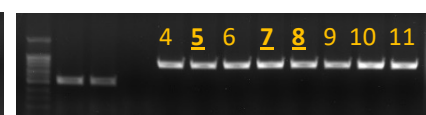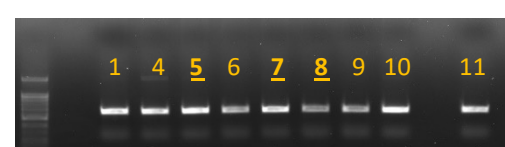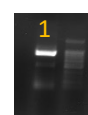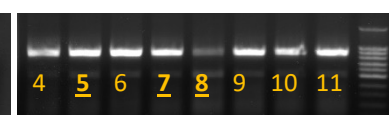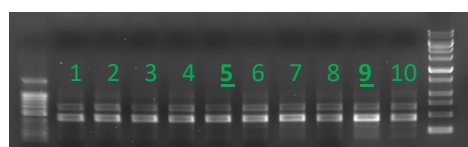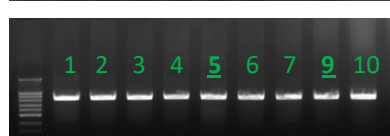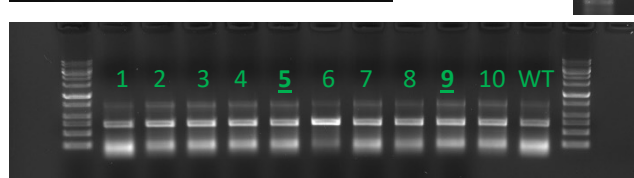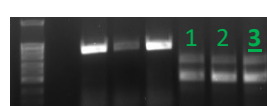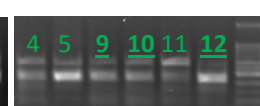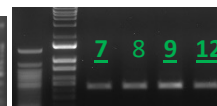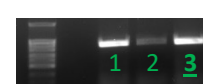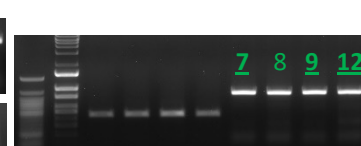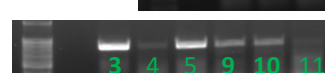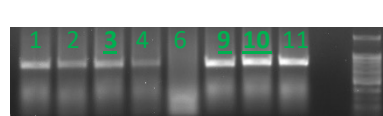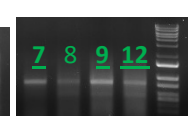

Supplement: supp [file elife-79592-supp-v1.zip]
